# Supplementary material for: DFT study of the Ring Opening Polymerization of ε-caprolactone by grafted lanthanide complexes: 2—Effect of the initiator ligand
Source: Royal Society of Chemistry journal article supplement (doi:10.1039/c1dt10567a), 2011-01-01
Supplement: c1dt10567a.pdf [file c1dt10567a.pdf]

## DFT study of the Ring Opening Polymerization of $\epsilon$ -caprolactone by grafted lanthanide complexes : 2- Effect of the initiator ligand

Iker Del Rosal, Romuald Poteau and Laurent Maron\*

1. Université de Toulouse ; INSA, UPS ; LPCNO (IRSAMC) ; 135 avenue de Rangueil, F-31077 Toulouse, France

2. CNRS ; UMR 5215 (IRSAMC) ; F-31077 Toulouse, France

e-mail: [laurent.maron@irsamc.ups-tlse.fr](mailto:laurent.maron@irsamc.ups-tlse.fr)

### 4 Polymerization of $\epsilon$ -Caprolactone

#### 4.1 Catalyst of type X-La@c-1 : (NMe<sub>2</sub>)La@c-1 and (CH<sub>3</sub>)La@c-1

##### (NMe<sub>2</sub>)La@c-1

63

|    |           |           |           |
|----|-----------|-----------|-----------|
| O  | 0.689901  | 0.531227  | 3.561518  |
| Si | 1.094229  | 1.689950  | 4.725193  |
| Si | -0.310288 | 0.466961  | 2.269726  |
| O  | -0.080958 | -0.990120 | 1.531324  |
| Si | 0.160676  | -1.935247 | 0.194362  |
| O  | 0.541610  | -3.454158 | 0.675806  |
| Si | -0.295980 | -4.917438 | 0.734780  |
| O  | -1.894131 | 0.551763  | 2.814462  |
| Si | -3.233809 | 0.394159  | 1.867034  |
| N  | -4.352233 | -0.544295 | 2.748029  |
| O  | -0.155110 | 1.747282  | 1.246641  |
| Si | 0.995478  | 2.459813  | 0.292816  |
| O  | 1.948970  | 3.343235  | 1.314580  |
| O  | -4.013315 | 1.836391  | 1.417111  |
| La | -3.930190 | 1.752883  | -1.325401 |
| O  | -2.384754 | 3.374234  | -1.624569 |
| Si | -0.838331 | 3.577346  | -2.054922 |
| O  | 0.262870  | 3.447777  | -0.791652 |
| O  | -2.806115 | -0.059944 | 0.338046  |
| Si | -2.123637 | -0.680170 | -1.096609 |
| O  | -1.268925 | -2.040215 | -0.687459 |
| Si | -4.872994 | 2.900769  | 2.456620  |
| O  | -3.347271 | -0.514444 | -2.110578 |
| O  | -0.959219 | 0.483310  | -1.480279 |
| Si | -0.269883 | 0.809571  | -2.977895 |
| O  | -1.010163 | -0.002842 | -4.197749 |
| Si | -2.477483 | 0.278042  | -4.989224 |
| N  | -6.112783 | 2.346753  | -1.715510 |
| O  | -0.375155 | 2.434274  | -3.209451 |
| O  | 1.295963  | 0.281723  | -2.862892 |
| Si | 2.055948  | 0.000782  | -1.408393 |
| O  | 1.410291  | -1.363467 | -0.711330 |
| O  | -0.564064 | 5.055458  | -2.740569 |
| Si | 0.641752  | 6.207921  | -2.546306 |
| O  | 1.960677  | 1.318250  | -0.423507 |
| O  | 3.664757  | -0.240115 | -1.659049 |
| H  | 0.704059  | 1.141386  | 6.056970  |
| H  | 2.793942  | 3.608363  | 0.938951  |
| H  | 0.452710  | 7.214109  | -3.631180 |
| H  | -0.540635 | -5.430109 | -0.644011 |
| H  | -6.272996 | 2.413085  | 2.598850  |
| H  | 3.878934  | -1.040077 | -2.148042 |
| H  | -2.159314 | 0.779249  | -6.358747 |
| H  | 2.001245  | 5.598552  | -2.664840 |

|   |           |           |           |
|---|-----------|-----------|-----------|
| H | 0.520759  | 6.881758  | -1.218338 |
| H | 2.567067  | 1.902050  | 4.677565  |
| H | -4.188873 | 2.946791  | 3.777096  |
| H | -4.843708 | 4.227278  | 1.784094  |
| H | 0.369097  | 2.967238  | 4.471222  |
| H | -3.251588 | -0.985322 | -5.063917 |
| H | -3.273129 | 1.349083  | -4.298030 |
| H | 0.570796  | -5.865762 | 1.488878  |
| H | -1.597699 | -4.745140 | 1.446559  |
| H | -5.236459 | -0.811657 | 2.341473  |
| H | -3.992269 | -1.242898 | 3.382012  |
| C | -6.640006 | 3.672237  | -1.961439 |
| C | -7.146566 | 1.336271  | -1.793925 |
| H | -7.946419 | 1.484712  | -1.046337 |
| H | -7.636483 | 1.305496  | -2.783169 |
| H | -6.729208 | 0.331233  | -1.620911 |
| H | -7.410022 | 3.963860  | -1.225007 |
| H | -5.841964 | 4.425418  | -1.909860 |
| H | -7.104348 | 3.761692  | -2.959266 |

## D

81

|    |           |           |           |
|----|-----------|-----------|-----------|
| C  | 3.685163  | 7.996196  | 10.184230 |
| C  | 2.557228  | 8.253190  | 11.164895 |
| C  | 2.379291  | 9.709733  | 11.595324 |
| C  | 2.010410  | 10.674751 | 10.468712 |
| C  | 3.058268  | 10.762207 | 9.341716  |
| C  | 3.022354  | 9.597456  | 8.399372  |
| O  | 3.352365  | 8.365034  | 8.816593  |
| La | 2.901568  | 7.086469  | 6.385844  |
| O  | 2.696102  | 9.671992  | 7.222437  |
| O  | 2.612247  | 4.406005  | 5.916560  |
| Si | 2.146172  | 4.324614  | 7.554786  |
| O  | 3.035036  | 5.475507  | 8.220774  |
| Si | 3.434915  | 3.472943  | 4.788335  |
| O  | 3.507101  | 4.483713  | 3.482560  |
| Si | 4.275740  | 4.322085  | 1.989324  |
| O  | 2.584859  | 2.075756  | 4.503543  |
| Si | 0.975615  | 1.746185  | 4.736027  |
| O  | 0.755802  | 1.165592  | 6.269167  |
| Si | 0.898689  | 1.618247  | 7.850453  |
| O  | 2.132834  | 2.735042  | 8.050147  |
| O  | 0.506567  | 0.542037  | 3.729185  |
| Si | 0.144836  | 0.400981  | 2.087692  |
| O  | 0.157735  | 3.154946  | 4.464309  |
| Si | -1.311029 | 3.821929  | 4.829539  |
| O  | -1.235297 | 5.450156  | 5.002203  |
| Si | -0.685150 | 6.915161  | 5.620190  |
| O  | -1.028100 | 6.887894  | 7.283300  |
| Si | -0.664720 | 5.618387  | 8.257148  |
| O  | -0.254681 | 6.177092  | 9.759016  |
| Si | -0.908712 | 5.712299  | 11.251405 |
| O  | -1.908767 | 3.059149  | 6.179728  |
| Si | -1.886777 | 3.003729  | 7.829014  |
| O  | -1.914775 | 4.539631  | 8.460209  |
| O  | -2.294006 | 3.465303  | 3.548107  |
| O  | -3.252496 | 2.282396  | 8.403373  |
| O  | -0.564385 | 2.160563  | 8.392222  |
| O  | 1.293821  | 0.303838  | 8.753425  |
| Si | 2.714064  | -0.231123 | 9.483059  |
| N  | 5.015516  | 2.964571  | 5.219079  |
| O  | 0.528199  | 4.755874  | 7.493892  |
| O  | -1.716922 | 8.058837  | 5.002352  |

|    |           |           |           |
|----|-----------|-----------|-----------|
| Si | -2.832152 | 8.017703  | 3.754436  |
| O  | 0.866329  | 7.242135  | 5.346172  |
| H  | 1.004121  | -0.683788 | 1.529456  |
| H  | -3.088001 | 4.005986  | 3.501207  |
| H  | -3.435955 | 9.379176  | 3.664369  |
| H  | 3.051828  | 0.627071  | 10.656556 |
| H  | 5.722101  | 4.671599  | 2.114746  |
| H  | -3.255066 | 1.323728  | 8.328535  |
| H  | -2.360278 | 6.041740  | 11.319338 |
| H  | -3.916770 | 7.022410  | 4.026839  |
| H  | -2.184190 | 7.674672  | 2.451977  |
| H  | -1.290567 | 0.025136  | 1.949895  |
| H  | 4.144305  | 2.926795  | 1.475166  |
| H  | 3.609316  | 5.273311  | 1.056015  |
| H  | 0.415189  | 1.679665  | 1.369120  |
| H  | -0.688772 | 4.259324  | 11.498516 |
| H  | -0.168952 | 6.509212  | 12.275151 |
| H  | 2.458223  | -1.628000 | 9.934673  |
| H  | 3.848509  | -0.214820 | 8.511407  |
| H  | 5.714293  | 3.662463  | 5.429782  |
| H  | 5.108590  | 2.146606  | 5.804035  |
| H  | 4.064870  | 10.840414 | 9.774046  |
| H  | 2.888956  | 11.646779 | 8.725093  |
| H  | 1.896447  | 11.681629 | 10.883982 |
| H  | 1.037136  | 10.408160 | 10.038731 |
| H  | 1.601037  | 9.757693  | 12.365172 |
| H  | 3.305048  | 10.059123 | 12.074743 |
| H  | 2.775365  | 7.645281  | 12.051498 |
| H  | 1.632409  | 7.846588  | 10.739187 |
| H  | 3.876710  | 6.927374  | 10.082647 |
| H  | 4.611562  | 8.513733  | 10.460166 |
| N  | 4.872457  | 7.519457  | 5.273747  |
| C  | 4.959991  | 8.141194  | 3.972167  |
| C  | 6.177678  | 7.186967  | 5.793953  |
| H  | 5.446366  | 7.491451  | 3.222089  |
| H  | 3.959562  | 8.381048  | 3.585068  |
| H  | 5.532241  | 9.086655  | 3.991768  |
| H  | 6.734997  | 6.488532  | 5.140941  |
| H  | 6.826237  | 8.073834  | 5.922329  |
| H  | 6.097655  | 6.705301  | 6.780959  |

TS<sub>D→E</sub>

|    |          |           |           |
|----|----------|-----------|-----------|
| 81 |          |           |           |
| C  | 3.830507 | 7.983635  | 10.069829 |
| C  | 3.630821 | 9.033973  | 11.151469 |
| C  | 4.261688 | 10.394381 | 10.849403 |
| C  | 3.796506 | 11.057533 | 9.550247  |
| C  | 4.142113 | 10.256863 | 8.278455  |
| C  | 3.151502 | 9.162046  | 8.000189  |
| O  | 2.939510 | 8.192382  | 8.955879  |
| La | 2.177817 | 6.737330  | 6.791427  |
| O  | 2.189654 | 9.277678  | 7.216726  |
| O  | 2.374425 | 4.086945  | 6.483811  |
| Si | 1.455266 | 3.937979  | 7.911147  |
| O  | 1.939982 | 5.246461  | 8.696879  |
| Si | 3.362736 | 3.722396  | 5.199174  |
| O  | 3.318702 | 5.252893  | 4.500096  |
| Si | 3.779291 | 5.776122  | 2.943225  |
| O  | 2.726473 | 2.476391  | 4.324750  |
| Si | 1.197176 | 1.823881  | 4.515731  |
| O  | 1.079377 | 1.156667  | 6.018269  |
| Si | 0.675410 | 1.156628  | 7.621506  |
| O  | 1.545379 | 2.357131  | 8.418385  |

|    |           |           |           |
|----|-----------|-----------|-----------|
| O  | 1.012090  | 0.608128  | 3.436098  |
| Si | 0.850521  | 0.474775  | 1.760763  |
| O  | 0.170329  | 3.086237  | 4.265705  |
| Si | -1.450511 | 3.389608  | 4.411306  |
| O  | -1.709522 | 4.973569  | 4.739937  |
| Si | -1.349081 | 6.352542  | 5.635713  |
| O  | -1.934169 | 6.038929  | 7.195634  |
| Si | -1.504459 | 4.719041  | 8.079734  |
| O  | -1.319422 | 5.114173  | 9.662452  |
| Si | -0.958324 | 6.554002  | 10.465028 |
| O  | -2.107056 | 2.367589  | 5.541091  |
| Si | -2.281188 | 2.064819  | 7.151208  |
| O  | -2.592608 | 3.469975  | 7.986702  |
| O  | -2.105428 | 3.001685  | 2.942985  |
| O  | -3.576314 | 1.052800  | 7.272085  |
| O  | -0.955348 | 1.301041  | 7.813802  |
| O  | 1.130119  | -0.272982 | 8.288310  |
| Si | 2.370629  | -0.724357 | 9.335584  |
| N  | 4.989996  | 3.312082  | 5.502054  |
| O  | -0.122828 | 4.094976  | 7.374909  |
| O  | -2.326321 | 7.541244  | 5.024608  |
| Si | -3.648494 | 7.511449  | 3.993389  |
| O  | 0.207063  | 6.778640  | 5.649904  |
| H  | 1.950728  | -0.408279 | 1.274072  |
| H  | -3.067052 | 3.004389  | 2.923649  |
| H  | -4.248437 | 8.877592  | 4.019814  |
| H  | 2.137529  | -0.159583 | 10.696610 |
| H  | 5.262091  | 5.924596  | 2.888372  |
| H  | -3.661720 | 0.621876  | 8.127565  |
| H  | -2.225695 | 7.127324  | 11.006772 |
| H  | -4.670169 | 6.515014  | 4.438733  |
| H  | -3.228021 | 7.185878  | 2.596650  |
| H  | -0.467565 | -0.151734 | 1.463523  |
| H  | 3.322995  | 4.788274  | 1.927129  |
| H  | 3.118910  | 7.094373  | 2.744496  |
| H  | 0.951124  | 1.811854  | 1.108113  |
| H  | -0.038694 | 6.225116  | 11.590215 |
| H  | -0.321029 | 7.544321  | 9.550093  |
| H  | 2.352584  | -2.213346 | 9.392651  |
| H  | 3.691872  | -0.255791 | 8.819437  |
| H  | 5.610797  | 3.957225  | 5.966351  |
| H  | 5.225087  | 2.345957  | 5.674118  |
| H  | 5.153582  | 9.844114  | 8.359884  |
| H  | 4.120966  | 10.904706 | 7.400583  |
| H  | 4.280701  | 12.036944 | 9.467177  |
| H  | 2.717285  | 11.251957 | 9.580807  |
| H  | 4.057949  | 11.071825 | 11.687051 |
| H  | 5.354463  | 10.278620 | 10.811245 |
| H  | 4.061946  | 8.637484  | 12.079349 |
| H  | 2.553327  | 9.136948  | 11.329636 |
| H  | 3.556960  | 6.989507  | 10.428400 |
| H  | 4.866108  | 7.953587  | 9.714661  |
| N  | 4.387809  | 7.839247  | 6.587217  |
| C  | 4.786941  | 8.746537  | 5.534928  |
| C  | 5.533373  | 7.135976  | 7.114610  |
| H  | 5.211527  | 8.223057  | 4.659017  |
| H  | 3.924846  | 9.328356  | 5.187701  |
| H  | 5.562264  | 9.465642  | 5.862430  |
| H  | 6.088657  | 6.576234  | 6.337201  |
| H  | 6.280282  | 7.808888  | 7.582590  |
| H  | 5.234329  | 6.407967  | 7.884044  |

E

81

|    |           |           |           |
|----|-----------|-----------|-----------|
| C  | 4.789364  | 7.338905  | 9.565100  |
| C  | 3.981144  | 8.029761  | 10.660876 |
| C  | 4.359490  | 9.493636  | 10.897231 |
| C  | 4.011710  | 10.441873 | 9.751054  |
| C  | 4.571898  | 10.022683 | 8.390990  |
| C  | 3.827185  | 8.840808  | 7.757967  |
| O  | 4.358102  | 7.526810  | 8.212325  |
| La | 2.116358  | 6.764833  | 6.932923  |
| O  | 2.500464  | 8.855119  | 7.934692  |
| O  | 2.274548  | 4.082960  | 6.793516  |
| Si | 1.171869  | 4.027809  | 8.094282  |
| O  | 1.554253  | 5.385898  | 8.849563  |
| Si | 3.409371  | 3.665964  | 5.665048  |
| O  | 3.542336  | 5.203880  | 4.961991  |
| Si | 4.232820  | 5.589062  | 3.445994  |
| O  | 2.833422  | 2.467178  | 4.691387  |
| Si | 1.278828  | 1.841472  | 4.767545  |
| O  | 1.036949  | 1.212644  | 6.271426  |
| Si | 0.441764  | 1.240572  | 7.816466  |
| O  | 1.198081  | 2.470393  | 8.682224  |
| O  | 1.166614  | 0.608619  | 3.698022  |
| Si | 1.126170  | 0.443738  | 2.017639  |
| O  | 0.300169  | 3.116268  | 4.410176  |
| Si | -1.325599 | 3.435620  | 4.372954  |
| O  | -1.590150 | 5.033364  | 4.626410  |
| Si | -1.373491 | 6.405390  | 5.575398  |
| O  | -2.139023 | 6.079604  | 7.046152  |
| Si | -1.760428 | 4.783734  | 7.988654  |
| O  | -1.670282 | 5.191654  | 9.572148  |
| Si | -1.202939 | 6.579913  | 10.420005 |
| O  | -2.124334 | 2.447013  | 5.437025  |
| Si | -2.453635 | 2.134153  | 7.022240  |
| O  | -2.841707 | 3.533053  | 7.834644  |
| O  | -1.819659 | 3.020693  | 2.849221  |
| O  | -3.756939 | 1.125887  | 7.002181  |
| O  | -1.201491 | 1.359272  | 7.803257  |
| O  | 0.833619  | -0.168692 | 8.561136  |
| Si | 1.945788  | -0.581171 | 9.758328  |
| N  | 4.966334  | 3.186124  | 6.169416  |
| O  | -0.337111 | 4.141606  | 7.377337  |
| O  | -2.266098 | 7.593144  | 4.845857  |
| Si | -3.516713 | 7.551944  | 3.727464  |
| O  | 0.166577  | 6.851082  | 5.788248  |
| H  | 2.223083  | -0.493769 | 1.637387  |
| H  | -2.773720 | 2.950241  | 2.749168  |
| H  | -4.143685 | 8.906059  | 3.729076  |
| H  | 1.555000  | 0.019429  | 11.066444 |
| H  | 5.707304  | 5.747686  | 3.596502  |
| H  | -3.963138 | 0.728745  | 7.853440  |
| H  | -2.432477 | 7.152894  | 11.044838 |
| H  | -4.544266 | 6.528676  | 4.088871  |
| H  | -2.991496 | 7.255269  | 2.360067  |
| H  | -0.190063 | -0.134885 | 1.630198  |
| H  | 3.921923  | 4.511960  | 2.468888  |
| H  | 3.617961  | 6.881833  | 3.035351  |
| H  | 1.334812  | 1.760581  | 1.349457  |
| H  | -0.245875 | 6.172795  | 11.483897 |
| H  | -0.595159 | 7.594786  | 9.513808  |
| H  | 1.928546  | -2.068165 | 9.853481  |
| H  | 3.315968  | -0.117399 | 9.384031  |
| H  | 5.530743  | 3.787925  | 6.750172  |
| H  | 5.128788  | 2.206645  | 6.352812  |

|   |          |           |           |
|---|----------|-----------|-----------|
| H | 5.645266 | 9.802646  | 8.453338  |
| H | 4.466432 | 10.866258 | 7.698930  |
| H | 4.388759 | 11.442982 | 9.993251  |
| H | 2.924358 | 10.522810 | 9.651734  |
| H | 3.867415 | 9.847127  | 11.811627 |
| H | 5.440681 | 9.544564  | 11.096019 |
| H | 4.171034 | 7.468045  | 11.584640 |
| H | 2.912783 | 7.927153  | 10.445499 |
| H | 4.742177 | 6.254595  | 9.706816  |
| H | 5.846789 | 7.635681  | 9.642287  |
| N | 4.073429 | 8.670757  | 6.273842  |
| C | 3.455129 | 9.737053  | 5.479244  |
| C | 5.473534 | 8.503811  | 5.885233  |
| H | 3.401870 | 9.422718  | 4.431776  |
| H | 2.447592 | 9.933487  | 5.848473  |
| H | 4.030526 | 10.675408 | 5.517011  |
| H | 5.524807 | 8.221567  | 4.828828  |
| H | 6.051900 | 9.432734  | 6.006978  |
| H | 5.933810 | 7.718510  | 6.484473  |

TS<sub>E→F</sub>

|    |           |           |           |
|----|-----------|-----------|-----------|
| 81 |           |           |           |
| C  | 1.515029  | 9.879458  | 6.269764  |
| N  | 2.792609  | 9.163832  | 6.414983  |
| C  | 3.745781  | 9.570911  | 5.386772  |
| C  | 3.269798  | 9.119694  | 7.786728  |
| O  | 2.418467  | 8.610627  | 8.582017  |
| La | 2.301237  | 6.517507  | 7.227907  |
| O  | 0.627799  | 6.663174  | 5.701283  |
| Si | -0.904893 | 6.377683  | 5.282475  |
| O  | -1.540482 | 7.642118  | 4.416504  |
| Si | -3.118141 | 8.171176  | 4.186199  |
| C  | 4.200804  | 10.212565 | 8.267592  |
| C  | 4.582040  | 10.109160 | 9.743427  |
| C  | 5.750746  | 9.171916  | 10.047810 |
| C  | 5.571434  | 7.706020  | 9.642486  |
| C  | 5.622536  | 7.429613  | 8.134992  |
| O  | 4.440543  | 7.665476  | 7.410392  |
| O  | 2.226872  | 3.866957  | 7.132880  |
| Si | 3.538806  | 3.282037  | 6.306673  |
| N  | 4.846446  | 2.594967  | 7.161621  |
| Si | 0.940025  | 3.908825  | 8.255299  |
| O  | -0.409312 | 4.117880  | 7.288635  |
| Si | -1.861307 | 4.880417  | 7.618471  |
| O  | -2.989744 | 3.718892  | 7.255449  |
| Si | -2.570022 | 2.260054  | 6.569284  |
| O  | -1.545707 | 1.426853  | 7.589132  |
| Si | 0.059728  | 1.183259  | 7.870474  |
| O  | 0.213899  | -0.241044 | 8.671706  |
| Si | 1.064741  | -0.721816 | 10.044455 |
| O  | 1.304362  | 5.245451  | 9.053855  |
| O  | 4.030870  | 4.782560  | 5.701572  |
| Si | 5.327595  | 5.105185  | 4.633582  |
| O  | 0.753832  | 2.365314  | 8.848929  |
| O  | 3.048913  | 2.162463  | 5.201124  |
| Si | 1.463897  | 1.648791  | 5.001458  |
| O  | 0.654707  | 2.963674  | 4.432139  |
| Si | -0.916025 | 3.396665  | 4.133702  |
| O  | -1.176815 | 3.001693  | 2.549292  |
| O  | 0.904646  | 1.095071  | 6.450147  |
| O  | 1.464425  | 0.385174  | 3.961846  |
| Si | 1.686138  | 0.171468  | 2.300981  |
| O  | -1.133985 | 5.007224  | 4.343679  |

|    |           |           |           |
|----|-----------|-----------|-----------|
| O  | -1.929973 | 2.473299  | 5.066292  |
| O  | -1.928843 | 6.193195  | 6.621659  |
| O  | -2.044310 | 5.310791  | 9.187578  |
| Si | -1.596504 | 6.648377  | 10.124621 |
| O  | -3.927295 | 1.352606  | 6.344553  |
| H  | 2.775794  | -0.832837 | 2.124971  |
| H  | -2.059865 | 3.206176  | 2.227704  |
| H  | -3.592479 | 8.943614  | 5.373572  |
| H  | 0.506664  | -0.069108 | 11.263852 |
| H  | 6.562300  | 5.374953  | 5.422714  |
| H  | -4.305201 | 0.999507  | 7.155349  |
| H  | -2.858656 | 7.322485  | 10.554121 |
| H  | -4.048283 | 7.029336  | 3.934795  |
| H  | -3.101160 | 9.068864  | 2.993166  |
| H  | 0.419419  | -0.350242 | 1.717216  |
| H  | 5.528050  | 3.932449  | 3.738479  |
| H  | 4.936411  | 6.309626  | 3.852098  |
| H  | 2.072519  | 1.455562  | 1.648860  |
| H  | -0.859645 | 6.157393  | 11.319230 |
| H  | -0.772246 | 7.609811  | 9.339950  |
| H  | 0.908210  | -2.200680 | 10.139245 |
| H  | 2.512987  | -0.378283 | 9.911335  |
| H  | 5.293702  | 3.093309  | 7.916472  |
| H  | 4.842703  | 1.595997  | 7.309269  |
| H  | 5.083341  | 10.274352 | 7.623387  |
| H  | 3.636054  | 11.143316 | 8.104841  |
| H  | 4.845597  | 11.111227 | 10.102289 |
| H  | 3.695274  | 9.795980  | 10.305113 |
| H  | 5.946941  | 9.214982  | 11.126558 |
| H  | 6.659644  | 9.557115  | 9.561690  |
| H  | 6.387686  | 7.130604  | 10.100153 |
| H  | 4.637777  | 7.306139  | 10.059454 |
| H  | 5.893951  | 6.370172  | 7.988667  |
| H  | 6.454548  | 8.011802  | 7.700310  |
| H  | 1.046993  | 9.580606  | 5.329415  |
| H  | 0.845654  | 9.614988  | 7.087882  |
| H  | 1.662138  | 10.970635 | 6.268442  |
| H  | 3.324205  | 9.332203  | 4.405735  |
| H  | 3.952842  | 10.651612 | 5.411461  |
| H  | 4.674638  | 9.016961  | 5.520811  |

## F

81

|    |           |           |          |
|----|-----------|-----------|----------|
| C  | 0.434992  | 11.152100 | 8.260123 |
| N  | 1.886595  | 11.139395 | 8.133635 |
| C  | 2.531632  | 12.423969 | 8.348088 |
| C  | 2.530951  | 9.997267  | 7.843598 |
| O  | 1.885351  | 8.921885  | 7.746878 |
| La | 2.290302  | 6.534068  | 7.123441 |
| O  | 1.028269  | 6.492078  | 5.216171 |
| Si | -0.462294 | 6.138623  | 4.715499 |
| O  | -1.018977 | 7.226677  | 3.591357 |
| Si | -2.544913 | 7.853379  | 3.290892 |
| C  | 4.027436  | 9.970014  | 7.650150 |
| C  | 4.776327  | 9.610525  | 8.948515 |
| C  | 6.227577  | 9.166038  | 8.703364 |
| C  | 6.447838  | 7.675435  | 8.408337 |
| C  | 5.835471  | 7.102573  | 7.124852 |
| O  | 4.457286  | 6.922654  | 7.197706 |
| O  | 2.307358  | 3.827124  | 6.985581 |
| Si | 3.558472  | 2.805883  | 6.522471 |
| N  | 4.627728  | 2.302958  | 7.765248 |
| Si | 0.954800  | 3.876100  | 8.023248 |

|    |           |           |           |
|----|-----------|-----------|-----------|
| O  | -0.341732 | 4.096386  | 6.986787  |
| Si | -1.743025 | 4.998509  | 7.097250  |
| O  | -2.951159 | 3.925989  | 6.733084  |
| Si | -2.604417 | 2.344990  | 6.333423  |
| O  | -1.780880 | 1.646469  | 7.607341  |
| Si | -0.243499 | 1.162855  | 7.961727  |
| O  | -0.350872 | -0.052692 | 9.061948  |
| Si | 0.513573  | -0.439866 | 10.454218 |
| O  | 1.237782  | 5.216557  | 8.856740  |
| O  | 4.362683  | 3.762318  | 5.437205  |
| Si | 5.761911  | 3.514230  | 4.528430  |
| O  | 0.696470  | 2.364288  | 8.669367  |
| O  | 2.949703  | 1.412907  | 5.866411  |
| Si | 1.425844  | 1.049310  | 5.311487  |
| O  | 0.870462  | 2.401808  | 4.545904  |
| Si | -0.583062 | 2.987801  | 4.008984  |
| O  | -0.717701 | 2.463437  | 2.445890  |
| O  | 0.480307  | 0.598497  | 6.589249  |
| O  | 1.509400  | -0.253800 | 4.323273  |
| Si | 2.024645  | -0.555784 | 2.746033  |
| O  | -0.646804 | 4.627142  | 4.015658  |
| O  | -1.796744 | 2.286217  | 4.900541  |
| O  | -1.589158 | 6.212757  | 5.990549  |
| O  | -2.039980 | 5.596767  | 8.596783  |
| Si | -1.466527 | 6.850631  | 9.561351  |
| O  | -4.008190 | 1.510474  | 6.110183  |
| H  | 3.042167  | -1.646117 | 2.807448  |
| H  | -1.354600 | 2.957877  | 1.921891  |
| H  | -2.929054 | 8.847410  | 4.339717  |
| H  | 0.216959  | 0.537035  | 11.542168 |
| H  | 6.969537  | 3.765648  | 5.370855  |
| H  | -4.375096 | 1.147705  | 6.921802  |
| H  | -2.638084 | 7.721819  | 9.885588  |
| H  | -3.582863 | 6.780318  | 3.229417  |
| H  | -2.473892 | 8.546992  | 1.970182  |
| H  | 0.854778  | -1.005916 | 1.941084  |
| H  | 5.808383  | 2.121605  | 3.994682  |
| H  | 5.725484  | 4.492885  | 3.405345  |
| H  | 2.632347  | 0.664364  | 2.140295  |
| H  | -0.896021 | 6.299768  | 10.818452 |
| H  | -0.458347 | 7.683094  | 8.839913  |
| H  | 0.072651  | -1.803928 | 10.861397 |
| H  | 1.982607  | -0.448534 | 10.180127 |
| H  | 5.090579  | 3.002765  | 8.327239  |
| H  | 4.360330  | 1.497879  | 8.313650  |
| H  | 4.208052  | 9.174615  | 6.923384  |
| H  | 4.412408  | 10.903795 | 7.231268  |
| H  | 4.765401  | 10.478881 | 9.619976  |
| H  | 4.236180  | 8.811221  | 9.468733  |
| H  | 6.813582  | 9.414421  | 9.597037  |
| H  | 6.659612  | 9.768394  | 7.891018  |
| H  | 7.533006  | 7.507803  | 8.363889  |
| H  | 6.078097  | 7.078816  | 9.253781  |
| H  | 6.329786  | 6.138950  | 6.918966  |
| H  | 6.102785  | 7.763939  | 6.278791  |
| H  | 0.022997  | 11.948368 | 7.631955  |
| H  | 0.036048  | 10.191565 | 7.942373  |
| H  | 0.145785  | 11.339367 | 9.300219  |
| H  | 2.313437  | 13.110195 | 7.521446  |
| H  | 2.148362  | 12.867238 | 9.272894  |
| H  | 3.609280  | 12.317133 | 8.447910  |

(CH<sub>3</sub>)La@c-1



58

|    |           |           |           |
|----|-----------|-----------|-----------|
| O  | 0.703953  | 0.559762  | 3.510869  |
| Si | 1.106155  | 1.697727  | 4.696023  |
| Si | -0.325465 | 0.495477  | 2.243281  |
| O  | -0.091914 | -0.945635 | 1.477228  |
| Si | 0.114694  | -1.896819 | 0.137308  |
| O  | 0.473813  | -3.422769 | 0.613267  |
| Si | -0.387479 | -4.872698 | 0.668688  |
| O  | -1.898869 | 0.537877  | 2.830286  |
| Si | -3.241669 | 0.385427  | 1.890423  |
| N  | -4.330766 | -0.623347 | 2.724993  |
| O  | -0.229610 | 1.798503  | 1.238777  |
| Si | 0.925644  | 2.488272  | 0.268864  |
| O  | 1.837377  | 3.440783  | 1.266730  |
| O  | -4.063536 | 1.828298  | 1.509256  |
| La | -4.000256 | 1.812796  | -1.210413 |
| O  | -2.454225 | 3.379774  | -1.679511 |
| Si | -0.909224 | 3.566707  | -2.130127 |
| O  | 0.205643  | 3.407421  | -0.881850 |
| O  | -2.811053 | 0.031556  | 0.331807  |
| Si | -2.136173 | -0.583161 | -1.118678 |
| O  | -1.337678 | -1.979925 | -0.715225 |
| Si | -4.905931 | 2.841253  | 2.618212  |
| O  | -3.366513 | -0.350050 | -2.117524 |
| O  | -0.911384 | 0.506155  | -1.494759 |
| Si | -0.252960 | 0.824043  | -3.010195 |
| O  | -0.913344 | -0.093942 | -4.195568 |
| Si | -2.289841 | 0.052851  | -5.169474 |
| C  | -6.420885 | 2.450454  | -1.526147 |
| O  | -0.474525 | 2.428307  | -3.299680 |
| O  | 1.345117  | 0.411302  | -2.855353 |
| Si | 2.045556  | 0.047227  | -1.390845 |
| O  | 1.362079  | -1.345425 | -0.784826 |
| O  | -0.629833 | 5.048770  | -2.802258 |
| Si | 0.599156  | 6.180507  | -2.627887 |
| O  | 1.926448  | 1.319108  | -0.348080 |
| O  | 3.660413  | -0.201718 | -1.590445 |
| H  | 0.759934  | 1.104779  | 6.020720  |
| H  | 2.682904  | 3.710081  | 0.895353  |
| H  | 0.408380  | 7.191961  | -3.707115 |
| H  | -0.658012 | -5.368204 | -0.711398 |
| H  | -6.291940 | 2.324523  | 2.784676  |
| H  | 3.885720  | -1.008417 | -2.063104 |
| H  | -1.821855 | 0.324775  | -6.560545 |
| H  | 1.944981  | 5.546606  | -2.770600 |
| H  | 0.512415  | 6.851885  | -1.296062 |
| H  | 2.571532  | 1.948467  | 4.619935  |
| H  | -4.175014 | 2.845973  | 3.913477  |
| H  | -4.914623 | 4.189203  | 1.989482  |
| H  | 0.343477  | 2.962121  | 4.491734  |
| H  | -3.040892 | -1.228405 | -5.124673 |
| H  | -3.149662 | 1.191658  | -4.725661 |
| H  | 0.472034  | -5.841908 | 1.404106  |
| H  | -1.677276 | -4.684659 | 1.398282  |
| H  | -5.219752 | -0.879968 | 2.322115  |
| H  | -3.955188 | -1.341940 | 3.326625  |
| H  | -6.675388 | 2.506990  | -2.598444 |
| H  | -7.126003 | 1.720983  | -1.094464 |
| H  | -6.696878 | 3.431085  | -1.107029 |

**G**

76

|   |          |          |          |
|---|----------|----------|----------|
| C | 5.204114 | 8.304884 | 9.454031 |
|---|----------|----------|----------|

|    |           |           |           |
|----|-----------|-----------|-----------|
| C  | 4.878709  | 7.117577  | 10.345645 |
| C  | 3.870002  | 7.417723  | 11.456762 |
| C  | 2.489773  | 7.856606  | 10.967194 |
| C  | 2.511670  | 9.118495  | 10.078431 |
| C  | 2.955918  | 8.812980  | 8.677494  |
| O  | 4.218849  | 8.512262  | 8.410671  |
| La | 2.579623  | 7.084205  | 5.840243  |
| O  | 2.171470  | 8.801740  | 7.727661  |
| O  | 1.704456  | 4.343776  | 5.988711  |
| Si | 2.004334  | 4.616933  | 7.644539  |
| O  | 3.326873  | 5.525410  | 7.644109  |
| Si | 2.890337  | 3.712748  | 4.978164  |
| O  | 3.343048  | 5.113264  | 4.156710  |
| Si | 4.460931  | 5.209001  | 2.851773  |
| O  | 2.156359  | 2.580405  | 4.021243  |
| Si | 1.059608  | 1.515588  | 4.695146  |
| O  | 1.522362  | 1.359088  | 6.288205  |
| Si | 1.099536  | 1.746875  | 7.840803  |
| O  | 1.906350  | 3.115675  | 8.363383  |
| O  | 1.229176  | 0.063352  | 3.958020  |
| Si | 0.182781  | -0.934645 | 3.081672  |
| O  | -0.487710 | 2.030102  | 4.507804  |
| Si | -1.557579 | 3.287175  | 4.678629  |
| O  | -0.826695 | 4.745133  | 4.475163  |
| Si | -0.913222 | 6.310614  | 5.071150  |
| O  | -1.466570 | 6.203444  | 6.655840  |
| Si | -0.921900 | 5.713692  | 8.125938  |
| O  | -1.308964 | 6.831799  | 9.272712  |
| Si | -2.618242 | 7.882724  | 9.431925  |
| O  | -2.241710 | 3.154285  | 6.182762  |
| Si | -1.882559 | 2.851495  | 7.754543  |
| O  | -1.614403 | 4.272724  | 8.563940  |
| O  | -2.707781 | 3.042207  | 3.523106  |
| O  | -3.177057 | 2.059699  | 8.393003  |
| O  | -0.536287 | 1.895568  | 7.938576  |
| O  | 1.574324  | 0.516271  | 8.820470  |
| Si | 2.564207  | 0.428830  | 10.181214 |
| N  | 4.306536  | 3.055772  | 5.681351  |
| O  | 0.729348  | 5.570097  | 8.155220  |
| O  | -2.150821 | 7.042630  | 4.232629  |
| Si | -2.158346 | 8.532541  | 3.451203  |
| O  | 0.482915  | 7.111233  | 4.944266  |
| H  | 0.974803  | -2.147533 | 2.730440  |
| H  | -3.123496 | 3.857950  | 3.226217  |
| H  | -3.544922 | 8.724255  | 2.931346  |
| H  | 2.050833  | 1.319230  | 11.263778 |
| H  | 5.791451  | 5.614062  | 3.378293  |
| H  | -3.008795 | 1.647358  | 9.245151  |
| H  | -3.901829 | 7.194280  | 9.110038  |
| H  | -1.197948 | 8.550399  | 2.307598  |
| H  | -1.829003 | 9.644755  | 4.393216  |
| H  | -0.991378 | -1.315622 | 3.918144  |
| H  | 4.537611  | 3.862443  | 2.219144  |
| H  | 3.924904  | 6.210564  | 1.894642  |
| H  | -0.272941 | -0.245300 | 1.840584  |
| H  | -2.624858 | 8.327336  | 10.856543 |
| H  | -2.439117 | 9.067346  | 8.542551  |
| H  | 2.532731  | -0.990503 | 10.633418 |
| H  | 3.963532  | 0.819103  | 9.835929  |
| H  | 4.757314  | 3.621576  | 6.390342  |
| H  | 4.278229  | 2.080312  | 5.945140  |
| H  | 3.164405  | 9.881827  | 10.520805 |
| H  | 1.508465  | 9.538018  | 9.989685  |

|   |          |          |           |
|---|----------|----------|-----------|
| H | 1.855590 | 8.078236 | 11.831841 |
| H | 1.995564 | 7.045937 | 10.420552 |
| H | 3.753266 | 6.524606 | 12.080865 |
| H | 4.281346 | 8.198042 | 12.113689 |
| H | 5.821074 | 6.787214 | 10.799517 |
| H | 4.526406 | 6.302969 | 9.700213  |
| H | 6.119526 | 8.132665 | 8.886809  |
| H | 5.322398 | 9.237354 | 10.019472 |
| C | 4.287098 | 8.371656 | 4.485306  |
| H | 4.261986 | 9.405471 | 4.876044  |
| H | 5.331467 | 8.040104 | 4.595207  |
| H | 4.095526 | 8.462477 | 3.405698  |

TS<sub>G→H</sub>

76

|    |           |           |           |
|----|-----------|-----------|-----------|
| C  | 3.701795  | 7.840917  | 10.215016 |
| C  | 3.686032  | 8.960318  | 11.243672 |
| C  | 4.517538  | 10.192701 | 10.878088 |
| C  | 4.199738  | 10.826412 | 9.518943  |
| C  | 4.529926  | 9.907834  | 8.325177  |
| C  | 3.414109  | 8.936760  | 8.033677  |
| O  | 2.893789  | 8.188249  | 9.071407  |
| La | 2.120824  | 6.696288  | 6.975982  |
| O  | 2.556716  | 9.141487  | 7.142036  |
| O  | 2.377421  | 4.037613  | 6.749722  |
| Si | 1.254985  | 3.910412  | 8.024362  |
| O  | 1.593680  | 5.257055  | 8.830727  |
| Si | 3.340650  | 3.769798  | 5.419051  |
| O  | 3.147446  | 5.308615  | 4.745160  |
| Si | 3.309973  | 5.850527  | 3.129923  |
| O  | 2.785802  | 2.488392  | 4.543606  |
| Si | 1.263473  | 1.797395  | 4.648954  |
| O  | 1.067807  | 1.150869  | 6.150463  |
| Si | 0.522204  | 1.131322  | 7.712768  |
| O  | 1.301126  | 2.344797  | 8.582591  |
| O  | 1.175501  | 0.566347  | 3.575126  |
| Si | 1.120064  | 0.411994  | 1.894212  |
| O  | 0.239316  | 3.040702  | 4.313942  |
| Si | -1.385630 | 3.356397  | 4.348410  |
| O  | -1.641756 | 4.947792  | 4.645154  |
| Si | -1.353309 | 6.311919  | 5.588457  |
| O  | -2.063227 | 5.977237  | 7.089740  |
| Si | -1.668435 | 4.656197  | 7.986771  |
| O  | -1.531466 | 5.034960  | 9.576970  |
| Si | -1.048466 | 6.419334  | 10.414725 |
| O  | -2.132604 | 2.342816  | 5.427587  |
| Si | -2.400881 | 2.015833  | 7.020819  |
| O  | -2.758673 | 3.413175  | 7.850245  |
| O  | -1.941233 | 2.968839  | 2.839310  |
| O  | -3.701181 | 1.004128  | 7.048895  |
| O  | -1.121757 | 1.238550  | 7.755075  |
| O  | 0.939156  | -0.292890 | 8.413174  |
| Si | 2.180724  | -0.754619 | 9.455886  |
| N  | 5.004851  | 3.521827  | 5.669442  |
| O  | -0.263025 | 4.020899  | 7.323855  |
| O  | -2.268078 | 7.515739  | 4.914290  |
| Si | -3.565079 | 7.502032  | 3.850007  |
| O  | 0.197000  | 6.734503  | 5.746260  |
| H  | 2.228549  | -0.503347 | 1.495032  |
| H  | -2.899534 | 2.924899  | 2.769630  |
| H  | -4.167121 | 8.867035  | 3.883112  |
| H  | 1.925555  | -0.231510 | 10.829402 |
| H  | 4.608461  | 5.367141  | 2.581022  |

|   |           |           |           |
|---|-----------|-----------|-----------|
| H | -3.828362 | 0.548515  | 7.886230  |
| H | -2.260495 | 6.990928  | 11.074237 |
| H | -4.595240 | 6.496303  | 4.251799  |
| H | -3.105427 | 7.200923  | 2.460187  |
| H | -0.190736 | -0.185882 | 1.517010  |
| H | 2.171672  | 5.352083  | 2.314729  |
| H | 3.297876  | 7.337310  | 3.217947  |
| H | 1.297165  | 1.737381  | 1.233527  |
| H | -0.059566 | 6.023578  | 11.454218 |
| H | -0.470217 | 7.445947  | 9.499369  |
| H | 2.186270  | -2.244670 | 9.471549  |
| H | 3.497394  | -0.249350 | 8.963825  |
| H | 5.572342  | 4.253918  | 6.070838  |
| H | 5.346477  | 2.593751  | 5.868106  |
| H | 5.468933  | 9.387666  | 8.525517  |
| H | 4.662447  | 10.483393 | 7.406519  |
| H | 4.801894  | 11.735457 | 9.411624  |
| H | 3.151596  | 11.146200 | 9.472515  |
| H | 4.386414  | 10.946947 | 11.662964 |
| H | 5.583046  | 9.922155  | 10.892642 |
| H | 4.054381  | 8.547126  | 12.191054 |
| H | 2.639810  | 9.242376  | 11.414840 |
| H | 3.231701  | 6.936438  | 10.605750 |
| H | 4.712184  | 7.586409  | 9.875182  |
| C | 4.770623  | 7.154812  | 7.076538  |
| H | 5.661793  | 7.690322  | 7.408707  |
| H | 4.882819  | 6.125940  | 7.472134  |
| H | 4.851296  | 7.102109  | 5.977909  |

## H

76

|    |           |           |           |
|----|-----------|-----------|-----------|
| C  | 2.584079  | 9.204454  | 9.486656  |
| C  | 1.733483  | 9.951200  | 8.468440  |
| C  | 2.526443  | 10.752402 | 7.434324  |
| C  | 3.620728  | 9.973466  | 6.694912  |
| C  | 4.785314  | 9.538400  | 7.588925  |
| C  | 4.620031  | 8.190109  | 8.310502  |
| O  | 3.238246  | 8.073744  | 8.902784  |
| La | 2.677288  | 5.992192  | 7.547308  |
| O  | 4.669258  | 7.133386  | 7.455795  |
| O  | 2.537232  | 3.463987  | 6.818006  |
| Si | 1.623270  | 3.188105  | 8.234958  |
| O  | 2.297440  | 4.247031  | 9.225985  |
| Si | 3.438550  | 3.295628  | 5.436261  |
| O  | 3.687096  | 4.955201  | 5.205756  |
| Si | 4.706328  | 5.708901  | 4.044320  |
| O  | 2.548195  | 2.504743  | 4.297060  |
| Si | 0.943930  | 2.052305  | 4.488720  |
| O  | 0.823354  | 1.060369  | 5.800826  |
| Si | 0.430200  | 0.703100  | 7.368188  |
| O  | 1.459115  | 1.544178  | 8.403981  |
| O  | 0.490626  | 1.185506  | 3.177642  |
| Si | 0.296007  | 1.489264  | 1.526741  |
| O  | 0.121536  | 3.470739  | 4.656837  |
| Si | -1.448795 | 3.921613  | 4.933172  |
| O  | -1.499969 | 5.398403  | 5.644146  |
| Si | -0.920873 | 6.472673  | 6.799763  |
| O  | -1.416638 | 5.852335  | 8.295943  |
| Si | -1.133285 | 4.303270  | 8.776421  |
| O  | -0.769698 | 4.230249  | 10.373180 |
| Si | 0.085716  | 5.210149  | 11.452519 |
| O  | -2.231535 | 2.752086  | 5.812311  |
| Si | -2.375768 | 2.098098  | 7.319316  |

|    |           |           |           |
|----|-----------|-----------|-----------|
| O  | -2.409455 | 3.284222  | 8.486382  |
| O  | -2.166009 | 3.982701  | 3.444320  |
| O  | -3.812916 | 1.293229  | 7.308768  |
| O  | -1.161072 | 1.010889  | 7.662780  |
| O  | 0.688450  | -0.893782 | 7.636105  |
| Si | 1.885987  | -1.772817 | 8.434002  |
| N  | 4.963708  | 2.539398  | 5.497000  |
| O  | 0.089842  | 3.711838  | 7.793363  |
| O  | -1.779861 | 7.872116  | 6.585104  |
| Si | -3.262147 | 8.187168  | 5.860839  |
| O  | 0.672981  | 6.733179  | 6.761277  |
| H  | 1.254171  | 0.612601  | 0.791703  |
| H  | -3.127106 | 4.013570  | 3.468013  |
| H  | -3.698798 | 9.532217  | 6.337778  |
| H  | 1.822465  | -1.525648 | 9.903303  |
| H  | 6.110280  | 5.703478  | 4.535752  |
| H  | -3.955344 | 0.724780  | 8.071315  |
| H  | -0.899762 | 5.736447  | 12.444066 |
| H  | -4.284690 | 7.166753  | 6.241888  |
| H  | -3.124845 | 8.213510  | 4.373251  |
| H  | -1.101198 | 1.136855  | 1.151259  |
| H  | 4.593165  | 4.957855  | 2.762951  |
| H  | 4.191916  | 7.095521  | 3.893944  |
| H  | 0.577855  | 2.919581  | 1.214232  |
| H  | 1.105859  | 4.382534  | 12.147735 |
| H  | 0.720966  | 6.366221  | 10.753858 |
| H  | 1.615298  | -3.208911 | 8.143790  |
| H  | 3.239005  | -1.401654 | 7.920423  |
| H  | 5.676658  | 2.854417  | 6.138007  |
| H  | 5.022573  | 1.551010  | 5.301062  |
| H  | 5.005317  | 10.333255 | 8.314030  |
| H  | 5.694224  | 9.412459  | 6.990759  |
| H  | 4.014577  | 10.615099 | 5.897876  |
| H  | 3.193610  | 9.099974  | 6.183869  |
| H  | 1.821787  | 11.165814 | 6.702869  |
| H  | 2.994601  | 11.616545 | 7.927931  |
| H  | 1.062530  | 10.627799 | 9.013814  |
| H  | 1.089835  | 9.218956  | 7.964403  |
| H  | 1.955311  | 8.806857  | 10.290557 |
| H  | 3.333001  | 9.857843  | 9.952059  |
| C  | 5.610870  | 8.042934  | 9.461408  |
| H  | 6.631455  | 8.105286  | 9.072317  |
| H  | 5.483639  | 8.823275  | 10.219114 |
| H  | 5.479592  | 7.064861  | 9.931987  |

TS<sub>E→I</sub>

|    |           |           |          |
|----|-----------|-----------|----------|
| 76 |           |           |          |
| Si | 3.389911  | 3.468594  | 5.407511 |
| O  | 2.523837  | 3.607892  | 6.811969 |
| Si | 1.600901  | 3.320066  | 8.208664 |
| O  | 0.033265  | 3.733693  | 7.780640 |
| O  | -1.583129 | 5.340783  | 5.614890 |
| O  | -2.236553 | 2.672670  | 5.849383 |
| O  | -1.090952 | 1.002575  | 7.727114 |
| Si | 0.511801  | 0.765636  | 7.423948 |
| O  | 0.868010  | 1.102670  | 5.843503 |
| H  | 3.419096  | -1.179446 | 8.001583 |
| Si | 0.326369  | 1.402958  | 1.564089 |
| H  | -1.060888 | 0.992991  | 1.209635 |
| Si | 2.089612  | -1.615861 | 8.525437 |
| O  | 0.842884  | -0.813130 | 7.724442 |
| Si | -2.348428 | 2.035156  | 7.366155 |
| O  | -3.749617 | 1.167844  | 7.371028 |

|    |           |           |           |
|----|-----------|-----------|-----------|
| O  | -2.434684 | 3.239428  | 8.511941  |
| Si | -1.192435 | 4.308180  | 8.770829  |
| O  | -0.812685 | 4.282201  | 10.364392 |
| O  | -1.531180 | 5.836751  | 8.258301  |
| Si | -0.004429 | 5.334486  | 11.413820 |
| Si | -3.318363 | 8.149178  | 5.738757  |
| O  | -1.859662 | 7.831133  | 6.507326  |
| Si | -1.014771 | 6.429812  | 6.760355  |
| O  | 0.582771  | 6.682896  | 6.739779  |
| La | 2.609811  | 6.200030  | 7.609188  |
| O  | 3.541715  | 5.125391  | 5.116750  |
| Si | 4.427700  | 5.883786  | 3.864981  |
| O  | 2.213231  | 4.425694  | 9.195912  |
| O  | 1.519356  | 1.672480  | 8.423489  |
| O  | 2.533766  | 2.585616  | 4.308611  |
| Si | 0.954702  | 2.061931  | 4.505644  |
| O  | 0.063829  | 3.442188  | 4.622168  |
| Si | -1.510010 | 3.850067  | 4.933670  |
| O  | -2.268705 | 3.866207  | 3.463810  |
| N  | 4.959978  | 2.802331  | 5.447957  |
| O  | 0.552330  | 1.136420  | 3.216613  |
| O  | 3.154593  | 8.010590  | 8.885097  |
| C  | 5.204083  | 7.929559  | 7.983932  |
| C  | 5.890480  | 7.555709  | 9.269624  |
| C  | 5.273197  | 9.380308  | 7.574417  |
| C  | 4.139588  | 9.921984  | 6.689356  |
| C  | 3.138847  | 10.824642 | 7.426610  |
| C  | 2.119236  | 10.150304 | 8.350505  |
| C  | 2.687802  | 9.217257  | 9.420542  |
| O  | 4.935062  | 7.042033  | 7.136728  |
| H  | 1.307712  | 0.549862  | 0.831638  |
| H  | -3.229116 | 3.854142  | 3.515303  |
| H  | -3.751671 | 9.507501  | 6.180108  |
| H  | 2.020498  | -1.356587 | 9.992633  |
| H  | 5.876277  | 5.909609  | 4.207832  |
| H  | -3.850498 | 0.584507  | 8.128935  |
| H  | -1.012263 | 5.824409  | 12.402031 |
| H  | -4.363136 | 7.148033  | 6.110655  |
| H  | -3.142629 | 8.147781  | 4.254918  |
| H  | 4.207872  | 5.137838  | 2.594397  |
| H  | 3.887449  | 7.266913  | 3.763497  |
| H  | 0.550546  | 2.837052  | 1.222938  |
| H  | 1.060482  | 4.576221  | 12.122039 |
| H  | 0.562531  | 6.505587  | 10.685190 |
| H  | 1.896339  | -3.068373 | 8.254291  |
| H  | 5.671786  | 3.192547  | 6.047312  |
| H  | 5.066087  | 1.807604  | 5.313211  |
| H  | 5.400234  | 10.003798 | 8.464668  |
| H  | 6.229899  | 9.440587  | 7.032289  |
| H  | 4.585763  | 10.510155 | 5.879625  |
| H  | 3.626434  | 9.088676  | 6.193742  |
| H  | 2.582215  | 11.398572 | 6.675172  |
| H  | 3.710602  | 11.567954 | 8.001548  |
| H  | 1.539130  | 10.940064 | 8.846958  |
| H  | 1.397709  | 9.575451  | 7.753984  |
| H  | 1.902240  | 9.012080  | 10.165285 |
| H  | 3.497234  | 9.731131  | 9.971523  |
| H  | 6.973263  | 7.669734  | 9.122535  |
| H  | 5.589122  | 8.210737  | 10.088311 |
| H  | 5.689752  | 6.515725  | 9.532598  |

|    |           |           |           |
|----|-----------|-----------|-----------|
| Si | 3.041323  | 4.008032  | 5.326813  |
| O  | 2.129011  | 4.109036  | 6.701060  |
| Si | 1.347452  | 3.778197  | 8.173026  |
| O  | -0.281006 | 3.848138  | 7.807133  |
| O  | -2.091990 | 5.017936  | 5.519705  |
| O  | -2.307718 | 2.302148  | 5.979475  |
| O  | -0.871941 | 0.989495  | 7.938312  |
| Si | 0.742534  | 1.013711  | 7.607642  |
| O  | 1.013198  | 1.261524  | 5.992462  |
| H  | 3.961037  | -0.314852 | 8.176541  |
| Si | 0.317095  | 1.115636  | 1.731360  |
| H  | -0.996701 | 0.451586  | 1.504608  |
| Si | 2.760989  | -0.942492 | 8.808904  |
| O  | 1.351451  | -0.452812 | 8.028364  |
| Si | -2.298068 | 1.753959  | 7.534028  |
| O  | -3.515840 | 0.645116  | 7.610972  |
| O  | -2.609578 | 2.991327  | 8.603323  |
| Si | -1.584998 | 4.289558  | 8.758577  |
| O  | -1.218126 | 4.465348  | 10.346760 |
| O  | -2.182565 | 5.684008  | 8.119480  |
| Si | -0.655811 | 5.744123  | 11.299013 |
| Si | -4.233750 | 7.532620  | 5.450187  |
| O  | -2.751442 | 7.490128  | 6.233967  |
| Si | -1.709374 | 6.253871  | 6.596175  |
| O  | -0.169274 | 6.737581  | 6.577710  |
| La | 1.967886  | 6.715758  | 7.346806  |
| O  | 2.893625  | 5.634275  | 4.863273  |
| Si | 3.444891  | 6.353350  | 3.416629  |
| O  | 1.805935  | 5.034839  | 9.058175  |
| O  | 1.592298  | 2.162271  | 8.497290  |
| O  | 2.382373  | 2.889807  | 4.308799  |
| Si | 0.920466  | 2.113541  | 4.584051  |
| O  | -0.196346 | 3.321450  | 4.608189  |
| Si | -1.804851 | 3.506450  | 4.955410  |
| O  | -2.592045 | 3.285711  | 3.516397  |
| N  | 4.711948  | 3.679410  | 5.451470  |
| O  | 0.683762  | 1.032170  | 3.377197  |
| O  | 2.338211  | 8.696040  | 8.224283  |
| C  | 5.601933  | 6.976194  | 7.998955  |
| C  | 6.997271  | 6.423288  | 8.039719  |
| C  | 5.329351  | 8.272470  | 8.706260  |
| C  | 5.397598  | 9.454304  | 7.710769  |
| C  | 4.804224  | 10.755131 | 8.275921  |
| C  | 3.293184  | 10.948096 | 8.090564  |
| C  | 2.357969  | 9.964918  | 8.801433  |
| O  | 4.712181  | 6.388572  | 7.377571  |
| H  | 1.387455  | 0.378508  | 0.997407  |
| H  | -3.542264 | 3.163948  | 3.602261  |
| H  | -4.851781 | 8.855038  | 5.762581  |
| H  | 2.713573  | -0.579001 | 10.254891 |
| H  | 4.877408  | 6.741187  | 3.568698  |
| H  | -3.513262 | 0.112505  | 8.411692  |
| H  | -1.760987 | 6.130506  | 12.226623 |
| H  | -5.139624 | 6.440793  | 5.920813  |
| H  | -4.054101 | 7.414050  | 3.971146  |
| H  | 3.278010  | 5.407068  | 2.280911  |
| H  | 2.610783  | 7.573783  | 3.230360  |
| H  | 0.272432  | 2.532325  | 1.267886  |
| H  | 0.509355  | 5.260234  | 12.088499 |
| H  | -0.280939 | 6.923199  | 10.467692 |
| H  | 2.835032  | -2.423422 | 8.658669  |
| H  | 5.230901  | 4.267801  | 6.089858  |
| H  | 5.005531  | 2.713494  | 5.483459  |

|   |          |           |          |
|---|----------|-----------|----------|
| H | 4.316435 | 8.228899  | 9.115601 |
| H | 6.052320 | 8.429727  | 9.513810 |
| H | 6.445372 | 9.617633  | 7.428719 |
| H | 4.862096 | 9.185508  | 6.792805 |
| H | 5.308336 | 11.596399 | 7.783953 |
| H | 5.060189 | 10.839112 | 9.341625 |
| H | 3.043909 | 11.958051 | 8.444176 |
| H | 3.051589 | 10.930838 | 7.018627 |
| H | 1.344278 | 10.396465 | 8.791530 |
| H | 2.652550 | 9.900766  | 9.865369 |
| H | 7.728746 | 7.212817  | 7.838138 |
| H | 7.200232 | 6.060399  | 9.055030 |
| H | 7.125247 | 5.602327  | 7.333368 |

#### 4.2 Catalysts of (alkyl or dialkylamido)(X<sub>2</sub>)La@c-2

- (CH<sub>3</sub>)(NMe<sub>2</sub>)La@c-2

##### (CH<sub>3</sub>)(NMe<sub>2</sub>)La@c-2

64

|    |           |           |           |
|----|-----------|-----------|-----------|
| C  | 3.253302  | 7.326164  | 10.707679 |
| N  | 2.651975  | 6.550371  | 9.647263  |
| C  | 3.414370  | 6.642036  | 8.419965  |
| La | 0.803185  | 5.195884  | 9.757543  |
| O  | 0.490493  | 4.071847  | 11.841159 |
| Si | -0.871452 | 4.617522  | 12.456917 |
| O  | -2.143736 | 3.544114  | 12.488000 |
| Si | -3.696489 | 3.473518  | 13.046466 |
| O  | -3.806141 | 4.162425  | 14.545584 |
| Si | -4.181220 | 5.602398  | 15.268290 |
| O  | -4.821828 | 5.347333  | 16.761157 |
| O  | -2.818314 | 6.534351  | 15.370490 |
| Si | -1.365390 | 6.781877  | 14.620364 |
| O  | -0.294957 | 7.294327  | 15.748099 |
| Si | 1.272049  | 6.834281  | 16.183497 |
| O  | -1.538180 | 7.958900  | 13.465987 |
| Si | -2.686751 | 8.750312  | 12.585414 |
| O  | -2.664493 | 8.159976  | 11.023969 |
| Si | -2.345329 | 6.682474  | 10.377292 |
| O  | -1.305907 | 5.833833  | 11.321492 |
| O  | -2.333372 | 10.343351 | 12.508515 |
| Si | -3.054510 | 11.760385 | 13.084670 |
| O  | -4.183281 | 8.538954  | 13.253721 |
| Si | -5.494415 | 7.524583  | 13.224426 |
| O  | -6.877687 | 8.383856  | 13.446167 |
| O  | -5.581259 | 6.807894  | 11.739336 |
| Si | -5.073676 | 5.455650  | 10.940475 |
| O  | -6.207803 | 4.963296  | 9.874932  |
| Si | -7.538930 | 3.920776  | 9.927671  |
| O  | -3.726195 | 5.854061  | 10.043299 |
| O  | -4.729713 | 4.254882  | 12.014390 |
| O  | -5.360498 | 6.396990  | 14.426452 |
| O  | -0.810947 | 5.384109  | 13.932793 |
| O  | -4.160330 | 1.907462  | 13.146086 |
| Si | -3.376436 | 0.434021  | 12.869887 |
| O  | -1.428255 | 6.807540  | 8.983723  |
| Si | -1.826145 | 7.455662  | 7.442196  |
| C  | 0.577877  | 3.662790  | 7.757975  |
| H  | -8.239206 | 4.042464  | 11.239081 |
| H  | -7.221236 | 8.350985  | 14.344018 |
| H  | -4.277275 | 4.823379  | 17.355937 |
| H  | -4.366212 | -0.625663 | 13.211873 |
| H  | -2.979523 | 0.322896  | 11.436741 |



|   |           |           |           |
|---|-----------|-----------|-----------|
| H | -2.174802 | 0.317038  | 13.745201 |
| H | -7.077610 | 2.518006  | 9.722858  |
| H | -8.441246 | 4.334324  | 8.817725  |
| H | 1.720147  | 7.817445  | 17.209045 |
| H | 1.259016  | 5.459926  | 16.762977 |
| H | 2.176035  | 6.879244  | 14.998303 |
| H | -4.360664 | 11.980366 | 12.399916 |
| H | -3.260451 | 11.670823 | 14.559292 |
| H | -2.109546 | 12.865085 | 12.762103 |
| H | -0.522940 | 7.793310  | 6.810145  |
| H | -2.553179 | 6.422324  | 6.658245  |
| H | -2.664467 | 8.669800  | 7.639054  |
| H | 4.452044  | 6.279096  | 8.533055  |
| H | 2.954483  | 6.034444  | 7.624536  |
| H | 3.479681  | 7.676252  | 8.035748  |
| H | 4.282395  | 6.999032  | 10.943190 |
| H | 3.311208  | 8.402489  | 10.463793 |
| H | 2.668970  | 7.237878  | 11.634025 |
| H | 1.441322  | 2.981108  | 7.675128  |
| H | -0.311594 | 3.014818  | 7.806127  |
| H | 0.523084  | 4.190300  | 6.791217  |

## D

82

|    |           |           |           |
|----|-----------|-----------|-----------|
| C  | 3.665165  | 7.187307  | 11.387790 |
| N  | 2.380556  | 7.337287  | 10.748351 |
| La | 0.379455  | 6.343506  | 11.355514 |
| O  | 0.042992  | 7.659885  | 13.805032 |
| Si | -0.468760 | 9.228827  | 13.945607 |
| O  | 0.583656  | 10.129541 | 14.841955 |
| Si | 1.659644  | 9.977133  | 16.088707 |
| O  | 2.871645  | 11.048578 | 15.846171 |
| Si | 3.732003  | 12.115572 | 16.832338 |
| C  | 2.434459  | 8.295807  | 9.669430  |
| O  | 0.669823  | 5.082580  | 7.972111  |
| C  | 0.714947  | 4.000184  | 8.739110  |
| O  | 0.669652  | 4.163770  | 9.954329  |
| C  | -1.718014 | 7.069804  | 10.097774 |
| Si | -0.112828 | 6.135245  | 14.579358 |
| O  | -1.610476 | 6.125789  | 15.313492 |
| Si | -2.340542 | 6.437578  | 16.757466 |
| O  | -3.571766 | 5.376894  | 16.985274 |
| Si | -4.093149 | 4.018087  | 16.129619 |
| O  | 0.083188  | 5.111786  | 13.378855 |
| C  | 0.721966  | 5.019292  | 6.529707  |
| C  | -0.516263 | 4.393290  | 5.907379  |
| C  | -0.535885 | 2.864274  | 5.930351  |
| C  | -0.465924 | 2.242574  | 7.325380  |
| C  | 0.792142  | 2.626348  | 8.128161  |
| O  | 1.022194  | 6.058566  | 15.796172 |
| Si | 1.977501  | 6.965215  | 16.784547 |
| O  | 1.262135  | 7.160722  | 18.264802 |
| Si | -0.253685 | 7.217546  | 18.926534 |
| O  | -1.276352 | 6.287001  | 18.014408 |
| O  | 3.411085  | 6.201060  | 17.015267 |
| Si | 4.085529  | 4.783618  | 16.398505 |
| O  | 2.274629  | 8.445122  | 16.109371 |
| O  | -1.979140 | 9.301874  | 14.614652 |
| Si | -2.704435 | 9.457465  | 16.095348 |
| O  | -4.136573 | 10.228228 | 15.895337 |
| Si | -5.753060 | 9.747525  | 15.949408 |
| O  | -0.518815 | 9.781999  | 12.400307 |
| Si | -1.304197 | 11.067347 | 11.627434 |

|    |           |           |           |
|----|-----------|-----------|-----------|
| O  | -1.756535 | 10.378959 | 17.083671 |
| Si | -0.573296 | 10.217369 | 18.231719 |
| O  | -0.791771 | 8.775230  | 19.014500 |
| O  | -2.978910 | 7.968058  | 16.760354 |
| O  | -0.638788 | 11.457537 | 19.310040 |
| O  | 0.917178  | 10.310229 | 17.531477 |
| O  | -0.224613 | 6.675020  | 20.480263 |
| H  | -1.339247 | 11.383396 | 19.964857 |
| H  | 0.014470  | 5.748788  | 20.578547 |
| H  | -5.235088 | 3.456050  | 16.906009 |
| H  | -4.550129 | 4.404128  | 14.763132 |
| H  | -2.999080 | 3.008398  | 16.033454 |
| H  | -5.980677 | 8.569283  | 15.062734 |
| H  | -6.143035 | 9.409914  | 17.349323 |
| H  | -6.549710 | 10.910578 | 15.466404 |
| H  | 5.456156  | 4.690387  | 16.976945 |
| H  | 3.279932  | 3.598645  | 16.816103 |
| H  | 4.164929  | 4.841112  | 14.910194 |
| H  | 2.872246  | 13.277445 | 17.199539 |
| H  | 4.205125  | 11.422295 | 18.065717 |
| H  | 4.897629  | 12.577950 | 16.027174 |
| H  | -0.629771 | 11.245023 | 10.312042 |
| H  | -2.744914 | 10.741665 | 11.433402 |
| H  | -1.168948 | 12.308547 | 12.445221 |
| H  | 0.812720  | 6.068225  | 6.245013  |
| H  | 1.640676  | 4.504220  | 6.223686  |
| H  | -0.563489 | 4.735111  | 4.866307  |
| H  | -1.399969 | 4.807832  | 6.408183  |
| H  | -1.443464 | 2.510364  | 5.428521  |
| H  | 0.308458  | 2.490807  | 5.333623  |
| H  | -1.359096 | 2.503068  | 7.906844  |
| H  | -0.473281 | 1.151816  | 7.228027  |
| H  | 0.936956  | 1.940189  | 8.964134  |
| H  | 1.680412  | 2.559376  | 7.486196  |
| H  | 3.135799  | 7.999564  | 8.865491  |
| H  | 1.445078  | 8.413415  | 9.200259  |
| H  | 2.747882  | 9.302449  | 10.003756 |
| H  | 4.447551  | 6.823524  | 10.694204 |
| H  | 4.043580  | 8.132599  | 11.819334 |
| H  | 3.606878  | 6.461256  | 12.211116 |
| H  | -2.511029 | 7.445451  | 10.764050 |
| H  | -1.536558 | 7.865302  | 9.356469  |
| H  | -2.171381 | 6.231971  | 9.540403  |

TS<sub>D→E</sub>

|    |           |           |           |
|----|-----------|-----------|-----------|
| 82 |           |           |           |
| C  | 2.725940  | 6.323765  | 11.097181 |
| N  | 1.464837  | 6.545978  | 10.423127 |
| La | -0.617488 | 5.735690  | 11.410198 |
| O  | -0.432147 | 7.227578  | 13.702643 |
| Si | -0.645431 | 8.872925  | 13.724443 |
| O  | 0.665211  | 9.628947  | 14.377651 |
| Si | 1.834408  | 9.355044  | 15.520038 |
| O  | 3.198432  | 10.119803 | 15.041687 |
| Si | 4.276831  | 11.197239 | 15.771052 |
| C  | 1.531952  | 7.717510  | 9.581251  |
| O  | -0.120614 | 5.024862  | 8.644276  |
| C  | 0.981045  | 4.551160  | 9.300969  |
| O  | 0.698068  | 3.879018  | 10.317055 |
| C  | -2.791627 | 6.495370  | 10.362594 |
| Si | -0.800416 | 5.832476  | 14.646315 |
| O  | -2.165013 | 6.201516  | 15.523834 |
| Si | -2.640069 | 6.757715  | 17.003045 |

|    |           |           |           |
|----|-----------|-----------|-----------|
| O  | -4.006419 | 5.982591  | 17.468933 |
| Si | -4.900857 | 4.708928  | 16.808938 |
| O  | -0.966906 | 4.717717  | 13.522885 |
| C  | -0.036115 | 5.594237  | 7.323880  |
| C  | 0.145341  | 4.526090  | 6.254259  |
| C  | 1.571984  | 3.988588  | 6.118854  |
| C  | 2.165498  | 3.389228  | 7.395694  |
| C  | 2.278016  | 4.394421  | 8.559626  |
| O  | 0.444980  | 5.611534  | 15.726977 |
| Si | 1.668127  | 6.403400  | 16.499911 |
| O  | 1.198706  | 6.863854  | 18.018518 |
| Si | -0.182453 | 7.279515  | 18.830947 |
| O  | -1.467119 | 6.496555  | 18.138348 |
| O  | 2.959900  | 5.405984  | 16.649236 |
| Si | 3.311057  | 3.851243  | 16.092009 |
| O  | 2.124224  | 7.734167  | 15.628517 |
| O  | -2.017879 | 9.287854  | 14.541748 |
| Si | -2.514962 | 9.720026  | 16.063562 |
| O  | -3.792484 | 10.732454 | 15.913732 |
| Si | -5.411561 | 10.682178 | 16.391235 |
| O  | -0.812217 | 9.274210  | 12.136986 |
| Si | -1.633656 | 10.539971 | 11.358557 |
| O  | -1.293402 | 10.520308 | 16.833546 |
| Si | -0.024373 | 10.218961 | 17.856085 |
| O  | -0.405752 | 8.914377  | 18.799039 |
| O  | -2.971914 | 8.380833  | 16.918389 |
| O  | 0.285260  | 11.528164 | 18.800714 |
| O  | 1.352333  | 9.956324  | 16.984428 |
| O  | -0.057927 | 6.884275  | 20.422775 |
| H  | -0.297727 | 11.624517 | 19.559535 |
| H  | 0.020067  | 5.942792  | 20.602562 |
| H  | -6.007512 | 4.443896  | 17.771284 |
| H  | -5.458981 | 5.101882  | 15.483053 |
| H  | -4.046619 | 3.494921  | 16.664759 |
| H  | -6.090922 | 9.493694  | 15.799012 |
| H  | -5.508903 | 10.633785 | 17.879223 |
| H  | -6.032866 | 11.935762 | 15.879481 |
| H  | 4.705440  | 3.560610  | 16.530213 |
| H  | 2.370910  | 2.862335  | 16.694969 |
| H  | 3.221528  | 3.795724  | 14.604287 |
| H  | 3.610965  | 12.512082 | 15.997841 |
| H  | 4.769287  | 10.643331 | 17.065190 |
| H  | 5.409822  | 11.355435 | 14.816289 |
| H  | -1.157956 | 10.533724 | 9.947575  |
| H  | -3.102671 | 10.305852 | 11.415128 |
| H  | -1.291081 | 11.836416 | 12.012072 |
| H  | -0.993776 | 6.104411  | 7.202873  |
| H  | 0.758410  | 6.346437  | 7.290161  |
| H  | -0.162849 | 4.963145  | 5.296052  |
| H  | -0.559018 | 3.711481  | 6.464538  |
| H  | 1.591591  | 3.232494  | 5.325075  |
| H  | 2.226041  | 4.804239  | 5.778757  |
| H  | 1.584665  | 2.516460  | 7.718934  |
| H  | 3.173088  | 3.020839  | 7.172793  |
| H  | 2.999863  | 4.043546  | 9.298645  |
| H  | 2.631583  | 5.361221  | 8.185614  |
| H  | 2.287076  | 7.625452  | 8.773656  |
| H  | 0.563011  | 7.915621  | 9.103819  |
| H  | 1.801288  | 8.628593  | 10.143780 |
| H  | 3.575615  | 6.229270  | 10.394193 |
| H  | 2.988978  | 7.143352  | 11.788538 |
| H  | 2.688974  | 5.397086  | 11.684758 |
| H  | -3.499650 | 6.926214  | 11.088210 |

|   |           |          |          |
|---|-----------|----------|----------|
| H | -2.662231 | 7.250633 | 9.569992 |
| H | -3.319116 | 5.648881 | 9.891510 |

**E**

|    |           |           |           |
|----|-----------|-----------|-----------|
| 82 |           |           |           |
| C  | 2.880639  | 5.801834  | 11.414875 |
| N  | 1.913666  | 6.466147  | 10.538221 |
| La | -0.652676 | 5.809540  | 11.393800 |
| O  | -0.445633 | 7.081841  | 13.775467 |
| Si | -0.680258 | 8.693906  | 13.556100 |
| O  | 0.640407  | 9.531212  | 14.073957 |
| Si | 1.791281  | 9.251000  | 15.246156 |
| O  | 3.179814  | 9.952943  | 14.744740 |
| Si | 4.298853  | 11.012698 | 15.443014 |
| C  | 2.443992  | 7.750193  | 10.082019 |
| O  | 0.318944  | 6.440356  | 8.937762  |
| C  | 1.376506  | 5.549761  | 9.459396  |
| O  | 0.797913  | 4.508118  | 10.076714 |
| C  | -2.916710 | 6.081520  | 10.291609 |
| Si | -0.818030 | 5.633720  | 14.623422 |
| O  | -2.195964 | 5.947467  | 15.504509 |
| Si | -2.658413 | 6.687385  | 16.905628 |
| O  | -4.044574 | 6.005400  | 17.447424 |
| Si | -4.960902 | 4.671487  | 16.955393 |
| O  | -0.964725 | 4.589870  | 13.433306 |
| C  | -0.175717 | 6.301166  | 7.605571  |
| C  | -0.363723 | 4.881574  | 7.073837  |
| C  | 0.909320  | 4.245847  | 6.511070  |
| C  | 1.992664  | 3.953664  | 7.548208  |
| C  | 2.407388  | 5.160109  | 8.391518  |
| O  | 0.437913  | 5.424008  | 15.699643 |
| Si | 1.636318  | 6.336591  | 16.379296 |
| O  | 1.173826  | 6.891910  | 17.868054 |
| Si | -0.191820 | 7.342742  | 18.687362 |
| O  | -1.490573 | 6.526848  | 18.064558 |
| O  | 2.980563  | 5.418741  | 16.564751 |
| Si | 3.341797  | 3.789783  | 16.299592 |
| O  | 2.014729  | 7.623916  | 15.405612 |
| O  | -2.059617 | 9.251642  | 14.258981 |
| Si | -2.548869 | 9.653877  | 15.799710 |
| O  | -3.849941 | 10.633847 | 15.665720 |
| Si | -5.469826 | 10.546926 | 16.141210 |
| O  | -0.846019 | 8.754418  | 11.902160 |
| Si | -1.539376 | 9.949849  | 10.888988 |
| O  | -1.327048 | 10.476396 | 16.542549 |
| Si | -0.045512 | 10.227270 | 17.563462 |
| O  | -0.414307 | 8.975264  | 18.578226 |
| O  | -2.952717 | 8.298918  | 16.648098 |
| O  | 0.279267  | 11.583616 | 18.431973 |
| O  | 1.316623  | 9.918196  | 16.681864 |
| O  | -0.037258 | 7.029884  | 20.294204 |
| H  | -0.267322 | 11.703706 | 19.214165 |
| H  | 0.002395  | 6.097627  | 20.526784 |
| H  | -6.072958 | 4.554778  | 17.940285 |
| H  | -5.508027 | 4.899218  | 15.587308 |
| H  | -4.126748 | 3.435330  | 16.975386 |
| H  | -6.117154 | 9.342198  | 15.546781 |
| H  | -5.564130 | 10.495473 | 17.628940 |
| H  | -6.116784 | 11.786400 | 15.628233 |
| H  | 4.751994  | 3.603082  | 16.742685 |
| H  | 2.434289  | 2.920566  | 17.103927 |
| H  | 3.211198  | 3.459559  | 14.851391 |
| H  | 3.683197  | 12.359383 | 15.616043 |

|   |           |           |           |
|---|-----------|-----------|-----------|
| H | 4.758998  | 10.484504 | 16.759178 |
| H | 5.441030  | 11.088138 | 14.489498 |
| H | -1.060384 | 9.642593  | 9.515893  |
| H | -3.021599 | 9.870744  | 10.974181 |
| H | -1.055252 | 11.288503 | 11.331358 |
| H | -1.140712 | 6.815703  | 7.631687  |
| H | 0.478492  | 6.863797  | 6.920884  |
| H | -1.106696 | 4.945810  | 6.268110  |
| H | -0.800350 | 4.252569  | 7.856805  |
| H | 0.648090  | 3.312170  | 5.997560  |
| H | 1.316846  | 4.913729  | 5.737197  |
| H | 1.649327  | 3.172566  | 8.234545  |
| H | 2.878535  | 3.563003  | 7.032346  |
| H | 3.329455  | 4.905916  | 8.926806  |
| H | 2.641543  | 6.026757  | 7.760025  |
| H | 3.404769  | 7.640533  | 9.554733  |
| H | 1.725885  | 8.228613  | 9.416865  |
| H | 2.611734  | 8.398059  | 10.948394 |
| H | 3.872680  | 5.702896  | 10.945772 |
| H | 3.004304  | 6.390274  | 12.329819 |
| H | 2.518513  | 4.804759  | 11.670785 |
| H | -3.727045 | 6.213172  | 11.027264 |
| H | -2.990080 | 6.931861  | 9.594839  |
| H | -3.185204 | 5.187538  | 9.704257  |

TS<sub>E→F</sub>

82

|    |           |           |           |
|----|-----------|-----------|-----------|
| C  | -3.311611 | 5.700693  | 9.985682  |
| La | -1.034230 | 5.534908  | 11.081710 |
| N  | 2.004038  | 4.765592  | 11.105457 |
| C  | 2.136761  | 3.455311  | 11.744101 |
| O  | 0.330719  | 4.066008  | 9.733344  |
| C  | 1.421134  | 4.743350  | 9.799677  |
| C  | 2.338945  | 4.737451  | 8.592707  |
| C  | 1.631190  | 4.776877  | 7.236234  |
| C  | 1.412287  | 6.176787  | 6.659244  |
| C  | 0.502391  | 7.107817  | 7.462332  |
| C  | 1.011046  | 7.482736  | 8.856587  |
| O  | 0.803085  | 6.519234  | 9.858556  |
| Si | -0.950105 | 5.416325  | 14.305728 |
| O  | -1.167451 | 4.348562  | 13.147483 |
| O  | -0.828702 | 6.880829  | 13.408363 |
| Si | -1.240256 | 8.473763  | 13.308443 |
| O  | -2.545684 | 8.854587  | 14.238050 |
| Si | -2.843562 | 9.219830  | 15.833505 |
| O  | -2.984959 | 7.840521  | 16.720941 |
| Si | -2.527521 | 6.254836  | 16.861443 |
| O  | -1.198915 | 6.161622  | 17.846135 |
| Si | 0.131028  | 7.044009  | 18.280327 |
| O  | -0.252780 | 8.657753  | 18.262381 |
| Si | -0.190978 | 9.966218  | 17.252668 |
| O  | -1.607734 | 10.148163 | 16.424262 |
| O  | -2.210866 | 5.615772  | 15.373549 |
| O  | 0.451977  | 5.321570  | 15.196757 |
| Si | 1.679661  | 6.290468  | 15.709673 |
| O  | 1.410619  | 6.775883  | 17.271952 |
| O  | -3.743638 | 5.420700  | 17.571662 |
| Si | -4.749014 | 4.159618  | 17.059924 |
| O  | 3.090970  | 5.460894  | 15.636258 |
| Si | 4.228460  | 4.972354  | 16.786857 |
| O  | 1.815008  | 7.621032  | 14.729794 |
| Si | 1.395960  | 9.213076  | 14.674038 |
| O  | 2.642718  | 10.060194 | 14.037350 |

|    |           |           |           |
|----|-----------|-----------|-----------|
| Si | 2.787285  | 11.430011 | 13.060786 |
| O  | 1.068883  | 9.774689  | 16.193222 |
| O  | 0.055890  | 9.417646  | 13.700487 |
| O  | -0.012124 | 11.350540 | 18.122202 |
| O  | 0.618922  | 6.589693  | 19.784732 |
| O  | -1.635446 | 8.616447  | 11.706735 |
| Si | -2.710715 | 9.668921  | 10.897315 |
| O  | -4.241638 | 10.064146 | 15.873925 |
| Si | -4.848036 | 11.337717 | 16.805880 |
| C  | 3.175034  | 5.604252  | 11.305259 |
| H  | 2.460354  | 11.080155 | 11.647989 |
| H  | -3.939586 | 2.939688  | 16.778097 |
| H  | -5.687138 | 3.903312  | 18.188946 |
| H  | -0.098539 | 6.346627  | 20.377438 |
| H  | 0.745314  | 11.362197 | 18.714787 |
| H  | -5.509102 | 4.565201  | 15.842806 |
| H  | -6.327615 | 11.312296 | 16.636949 |
| H  | -4.487908 | 11.149430 | 18.240966 |
| H  | -4.295730 | 12.629240 | 16.305572 |
| H  | 4.834530  | 6.162914  | 17.450442 |
| H  | 3.589836  | 4.090348  | 17.805412 |
| H  | 5.273214  | 4.218894  | 16.037727 |
| H  | 1.873799  | 12.508814 | 13.538616 |
| H  | 4.205482  | 11.872982 | 13.163388 |
| H  | -2.517646 | 11.052015 | 11.420822 |
| H  | -2.338719 | 9.599818  | 9.458742  |
| H  | -4.111444 | 9.218814  | 11.112009 |
| H  | 0.500883  | 8.403289  | 9.180380  |
| H  | 2.083513  | 7.739482  | 8.790853  |
| H  | 0.381138  | 8.039047  | 6.891803  |
| H  | -0.502119 | 6.672907  | 7.557023  |
| H  | 0.998464  | 6.070928  | 5.648185  |
| H  | 2.389043  | 6.667589  | 6.533151  |
| H  | 0.676004  | 4.248195  | 7.329505  |
| H  | 2.232124  | 4.207314  | 6.517367  |
| H  | 2.885147  | 3.787013  | 8.690160  |
| H  | 3.092564  | 5.526735  | 8.673789  |
| H  | 4.092199  | 5.177594  | 10.867203 |
| H  | 2.988468  | 6.588542  | 10.874313 |
| H  | 3.341714  | 5.726007  | 12.379396 |
| H  | 3.007476  | 2.896094  | 11.362592 |
| H  | 2.264036  | 3.597856  | 12.820400 |
| H  | 1.236599  | 2.866187  | 11.576608 |
| H  | -4.122146 | 5.987769  | 10.675264 |
| H  | -3.360244 | 6.410394  | 9.143051  |
| H  | -3.612465 | 4.725256  | 9.566542  |

## F

|    |           |          |           |
|----|-----------|----------|-----------|
| 82 |           |          |           |
| C  | -2.836064 | 5.626083 | 10.373645 |
| La | -0.495598 | 5.739017 | 11.356981 |
| N  | 1.732205  | 2.107061 | 9.293397  |
| C  | 0.925449  | 1.054196 | 9.894616  |
| O  | 0.536631  | 3.690580 | 10.353966 |
| C  | 1.493133  | 3.396325 | 9.595363  |
| C  | 2.342774  | 4.502070 | 9.017689  |
| C  | 1.757172  | 5.061434 | 7.706390  |
| C  | 2.354554  | 6.423230 | 7.315743  |
| C  | 1.681741  | 7.665392 | 7.917324  |
| C  | 1.722301  | 7.831416 | 9.442104  |
| O  | 0.848713  | 6.986247 | 10.113253 |
| Si | -0.404392 | 6.048319 | 14.609358 |
| O  | -0.292543 | 4.846959 | 13.576556 |

|    |           |           |           |
|----|-----------|-----------|-----------|
| O  | -0.651063 | 7.404388  | 13.574653 |
| Si | -1.421178 | 8.870943  | 13.564266 |
| O  | -2.747671 | 8.861565  | 14.546975 |
| Si | -3.198246 | 9.224291  | 16.098945 |
| O  | -3.053501 | 7.890953  | 17.058205 |
| Si | -2.179014 | 6.485840  | 17.154847 |
| O  | -0.881648 | 6.721042  | 18.157022 |
| Si | 0.171015  | 7.917801  | 18.602594 |
| O  | -0.611204 | 9.379195  | 18.558036 |
| Si | -0.855448 | 10.653725 | 17.531516 |
| O  | -2.258387 | 10.456150 | 16.684361 |
| O  | -1.705516 | 6.010409  | 15.650498 |
| O  | 0.944672  | 6.366567  | 15.530556 |
| Si | 1.918402  | 7.572817  | 16.073250 |
| O  | 1.501420  | 7.971742  | 17.628399 |
| O  | -3.122376 | 5.328456  | 17.832751 |
| Si | -3.868774 | 3.941522  | 17.221572 |
| O  | 3.485142  | 7.091501  | 16.049235 |
| Si | 4.551995  | 6.504385  | 17.216752 |
| O  | 1.789517  | 8.900830  | 15.092768 |
| Si | 0.924881  | 10.304284 | 15.003061 |
| O  | 1.864997  | 11.497437 | 14.391360 |
| Si | 2.351861  | 11.969748 | 12.846630 |
| O  | 0.441393  | 10.778789 | 16.508382 |
| O  | -0.390802 | 10.083363 | 14.014579 |
| O  | -1.047768 | 12.050863 | 18.379009 |
| O  | 0.729717  | 7.612384  | 20.121298 |
| O  | -1.883984 | 9.074528  | 12.001855 |
| Si | -3.155100 | 9.889207  | 11.231926 |
| O  | -4.760491 | 9.710298  | 16.064666 |
| Si | -5.633027 | 10.966423 | 16.780412 |
| C  | 2.753593  | 1.647903  | 8.368686  |
| H  | 2.577805  | 10.777920 | 11.978444 |
| H  | -2.844346 | 2.912075  | 16.882331 |
| H  | -4.754254 | 3.437419  | 18.309778 |
| H  | 0.059880  | 7.285910  | 20.729470 |
| H  | -0.254432 | 12.364557 | 18.823098 |
| H  | -4.680882 | 4.270974  | 16.014569 |
| H  | -7.071679 | 10.664272 | 16.536908 |
| H  | -5.361921 | 11.023380 | 18.246110 |
| H  | -5.270837 | 12.266537 | 16.145165 |
| H  | 5.001458  | 7.614863  | 18.105537 |
| H  | 3.907102  | 5.432871  | 18.030321 |
| H  | 5.718399  | 5.947009  | 16.474157 |
| H  | 1.309284  | 12.847673 | 12.240100 |
| H  | 3.621705  | 12.731412 | 13.013596 |
| H  | -3.274890 | 11.269507 | 11.788508 |
| H  | -2.799300 | 9.950098  | 9.787941  |
| H  | -4.431306 | 9.147899  | 11.428459 |
| H  | 1.480497  | 8.884098  | 9.667532  |
| H  | 2.765824  | 7.684004  | 9.784870  |
| H  | 2.162474  | 8.546676  | 7.469485  |
| H  | 0.628473  | 7.695749  | 7.607155  |
| H  | 2.301551  | 6.515808  | 6.223533  |
| H  | 3.426955  | 6.431986  | 7.560285  |
| H  | 0.670626  | 5.158858  | 7.808907  |
| H  | 1.929696  | 4.337837  | 6.898710  |
| H  | 3.382855  | 4.195358  | 8.873960  |
| H  | 2.322637  | 5.300597  | 9.762867  |
| H  | 3.189051  | 2.476217  | 7.814558  |
| H  | 3.549948  | 1.116245  | 8.903089  |
| H  | 2.304368  | 0.956918  | 7.647332  |
| H  | 0.286433  | 0.583831  | 9.138586  |

|   |           |          |           |
|---|-----------|----------|-----------|
| H | 1.583473  | 0.290849 | 10.322522 |
| H | 0.302827  | 1.482262 | 10.677135 |
| H | -3.628457 | 5.736243 | 11.131880 |
| H | -3.036250 | 6.387027 | 9.603192  |
| H | -3.018983 | 4.650533 | 9.891018  |

## G

|    |           |           |           |
|----|-----------|-----------|-----------|
| 82 |           |           |           |
| C  | 2.722618  | 5.787418  | 2.717979  |
| La | 3.168655  | 4.543967  | 4.885562  |
| Si | 5.516867  | 5.866696  | 7.468619  |
| O  | 5.301122  | 7.503413  | 7.772067  |
| Si | 4.963035  | 8.555007  | 8.979208  |
| O  | 6.345687  | 9.216902  | 9.606150  |
| Si | 7.944848  | 8.825259  | 9.768332  |
| O  | 8.804618  | 10.221091 | 9.613206  |
| O  | 8.184793  | 8.167015  | 11.269213 |
| Si | 7.353369  | 7.318590  | 12.421758 |
| O  | 7.808029  | 7.789341  | 13.931212 |
| O  | 7.641832  | 5.701697  | 12.214662 |
| Si | 7.964627  | 4.629614  | 10.997881 |
| O  | 8.806323  | 5.376286  | 9.788656  |
| Si | 8.522956  | 6.128403  | 8.340197  |
| O  | 9.804781  | 5.846392  | 7.355475  |
| Si | 9.934633  | 5.216966  | 5.792744  |
| O  | 5.735037  | 7.639802  | 12.337167 |
| Si | 4.365396  | 7.051217  | 11.620806 |
| O  | 3.082063  | 7.341346  | 12.601593 |
| Si | 2.939952  | 7.876983  | 14.197737 |
| O  | 8.436109  | 7.766057  | 8.597621  |
| O  | 7.148952  | 5.553494  | 7.647570  |
| O  | 6.561598  | 3.986679  | 10.401397 |
| Si | 4.968726  | 4.380608  | 10.173653 |
| O  | 4.063574  | 3.013843  | 10.274966 |
| Si | 3.378182  | 2.140901  | 11.543079 |
| O  | 8.880397  | 3.436746  | 11.648264 |
| Si | 9.324465  | 1.876654  | 11.185537 |
| O  | 4.716150  | 5.049830  | 8.700042  |
| O  | 4.489294  | 5.421808  | 11.379223 |
| O  | 4.091460  | 7.817641  | 10.181813 |
| O  | 4.027086  | 9.778707  | 8.388473  |
| Si | 4.354874  | 11.422593 | 8.161528  |
| O  | 4.951677  | 5.440766  | 6.040899  |
| O  | 1.379623  | 6.750844  | 6.653911  |
| C  | 0.482993  | 5.774689  | 6.596865  |
| C  | -0.903875 | 5.958661  | 7.145746  |
| C  | -0.949060 | 6.204207  | 8.666394  |
| C  | -0.592186 | 7.631565  | 9.080323  |
| C  | 0.811921  | 8.080396  | 8.679751  |
| C  | 1.088619  | 8.073010  | 7.187548  |
| O  | 0.847111  | 4.716995  | 6.083072  |
| N  | 3.416492  | 2.297727  | 4.450263  |
| C  | 4.182564  | 1.305098  | 5.165364  |
| C  | 2.780180  | 1.739061  | 3.278114  |
| H  | 8.743409  | 7.678385  | 14.125117 |
| H  | 3.728954  | 7.005354  | 15.114804 |
| H  | 3.399239  | 9.291082  | 14.312077 |
| H  | 2.073772  | 0.924254  | 3.523962  |
| H  | 9.456901  | 1.784089  | 9.702141  |
| H  | 9.643672  | 10.110064 | 9.156354  |
| H  | 11.376505 | 5.320748  | 5.428436  |
| H  | 9.507141  | 3.788065  | 5.770704  |
| H  | 9.108525  | 6.012223  | 4.839353  |



|   |           |           |           |
|---|-----------|-----------|-----------|
| H | 10.634192 | 1.591146  | 11.836561 |
| H | 8.298148  | 0.904614  | 11.662758 |
| H | 4.562099  | 12.098824 | 9.474028  |
| H | 5.549009  | 11.608292 | 7.289033  |
| H | 3.144833  | 11.982641 | 7.491339  |
| H | 1.489064  | 7.786440  | 14.530186 |
| H | 3.230989  | 0.735290  | 11.070723 |
| H | 4.249819  | 2.187105  | 12.753543 |
| H | 2.035203  | 2.704910  | 11.871328 |
| H | 2.001293  | 8.626402  | 6.967618  |
| H | 0.265205  | 8.506000  | 6.607347  |
| H | 0.973296  | 9.109605  | 9.019984  |
| H | 1.580653  | 7.482553  | 9.181773  |
| H | -0.696958 | 7.721396  | 10.167239 |
| H | -1.328609 | 8.321200  | 8.643268  |
| H | -0.293726 | 5.483523  | 9.171035  |
| H | -1.966911 | 5.978199  | 9.001308  |
| H | -1.446775 | 5.048794  | 6.884376  |
| H | -1.385611 | 6.794440  | 6.620122  |
| H | 2.983502  | 6.856626  | 2.770363  |
| H | 1.665264  | 5.741902  | 2.405518  |
| H | 3.299788  | 5.376215  | 1.873880  |
| H | 3.503197  | 1.323721  | 2.551742  |
| H | 2.204891  | 2.508412  | 2.738540  |
| H | 4.656831  | 1.744664  | 6.053209  |
| H | 3.559671  | 0.461254  | 5.516500  |
| H | 4.990486  | 0.865186  | 4.551421  |

TS<sub>G→H</sub>

|    |           |           |           |
|----|-----------|-----------|-----------|
| 82 |           |           |           |
| C  | 1.400947  | 5.334305  | 4.712046  |
| La | 3.319710  | 4.416429  | 6.325084  |
| Si | 5.763939  | 6.339594  | 7.287093  |
| O  | 5.646462  | 7.911832  | 7.815048  |
| Si | 5.300636  | 8.796355  | 9.157767  |
| O  | 6.704331  | 9.273299  | 9.899458  |
| Si | 8.269800  | 8.764047  | 10.031557 |
| O  | 9.203811  | 10.117759 | 10.087742 |
| O  | 8.441213  | 7.875255  | 11.420190 |
| Si | 7.528722  | 6.937596  | 12.432878 |
| O  | 7.974137  | 7.161341  | 13.999950 |
| O  | 7.721057  | 5.347789  | 12.005194 |
| Si | 8.006258  | 4.422004  | 10.668200 |
| O  | 8.879693  | 5.273455  | 9.557827  |
| Si | 8.736617  | 6.263292  | 8.238151  |
| O  | 10.047162 | 6.039204  | 7.279727  |
| Si | 10.245018 | 5.527388  | 5.681083  |
| O  | 5.937006  | 7.370481  | 12.363723 |
| Si | 4.545780  | 6.977611  | 11.559389 |
| O  | 3.263829  | 7.215210  | 12.547227 |
| Si | 3.072590  | 7.809167  | 14.118106 |
| O  | 8.733443  | 7.842695  | 8.736791  |
| O  | 7.367593  | 5.899882  | 7.393734  |
| O  | 6.565720  | 3.918822  | 10.009197 |
| Si | 5.029509  | 4.490677  | 9.804668  |
| O  | 3.988226  | 3.236861  | 9.563992  |
| Si | 2.998881  | 2.323660  | 10.601046 |
| O  | 8.859843  | 3.108305  | 11.143043 |
| Si | 8.951796  | 1.498960  | 10.640076 |
| O  | 4.909993  | 5.360750  | 8.407151  |
| O  | 4.573830  | 5.375831  | 11.122648 |
| O  | 4.380234  | 7.906301  | 10.206439 |
| O  | 4.437427  | 10.124990 | 8.734959  |

|    |           |           |           |
|----|-----------|-----------|-----------|
| Si | 4.803786  | 11.769668 | 8.613023  |
| O  | 5.043097  | 5.986847  | 5.910988  |
| O  | 1.493665  | 6.610302  | 7.319153  |
| C  | 0.782031  | 5.502678  | 6.944459  |
| C  | -0.685773 | 5.644475  | 6.613165  |
| C  | -1.468062 | 6.321494  | 7.754921  |
| C  | -1.399593 | 7.850801  | 7.716649  |
| C  | -0.004692 | 8.447483  | 7.917727  |
| C  | 1.060981  | 7.931977  | 6.960492  |
| O  | 1.209731  | 4.450002  | 7.508013  |
| N  | 3.806447  | 2.366314  | 5.398650  |
| C  | 4.999951  | 2.036487  | 4.651786  |
| C  | 2.905743  | 1.238266  | 5.481772  |
| H  | 8.893417  | 6.957304  | 14.195133 |
| H  | 3.750004  | 6.908690  | 15.094663 |
| H  | 3.629816  | 9.188591  | 14.221935 |
| H  | 3.358239  | 0.368419  | 5.992842  |
| H  | 8.981547  | 1.418183  | 9.150525  |
| H  | 10.101124 | 9.991643  | 9.765441  |
| H  | 11.714190 | 5.523591  | 5.431094  |
| H  | 9.693812  | 4.152571  | 5.504748  |
| H  | 9.569069  | 6.472573  | 4.746497  |
| H  | 10.213649 | 0.950482  | 11.210839 |
| H  | 7.780519  | 0.738930  | 11.165166 |
| H  | 5.021640  | 12.349821 | 9.969425  |
| H  | 6.014991  | 11.976156 | 7.767725  |
| H  | 3.618987  | 12.407759 | 7.971497  |
| H  | 1.604549  | 7.829460  | 14.372771 |
| H  | 2.428591  | 1.231717  | 9.766687  |
| H  | 3.827750  | 1.755051  | 11.703816 |
| H  | 1.918214  | 3.180834  | 11.161270 |
| H  | 1.965276  | 8.539699  | 7.033186  |
| H  | 0.726003  | 7.947159  | 5.916779  |
| H  | -0.060028 | 9.537152  | 7.800189  |
| H  | 0.348664  | 8.262875  | 8.939608  |
| H  | -2.070436 | 8.259353  | 8.482001  |
| H  | -1.797771 | 8.191843  | 6.750106  |
| H  | -1.119434 | 5.941164  | 8.722930  |
| H  | -2.517582 | 6.018370  | 7.665589  |
| H  | -1.047289 | 4.628298  | 6.443255  |
| H  | -0.836421 | 6.204541  | 5.686301  |
| H  | 1.041997  | 6.339917  | 4.475736  |
| H  | 0.638460  | 4.610512  | 4.403164  |
| H  | 2.254908  | 5.184097  | 4.017272  |
| H  | 2.573869  | 0.884538  | 4.488320  |
| H  | 1.997224  | 1.500207  | 6.044828  |
| H  | 5.674014  | 2.902142  | 4.589107  |
| H  | 5.574985  | 1.212461  | 5.112671  |
| H  | 4.777170  | 1.724560  | 3.614760  |

## H

|    |           |           |           |
|----|-----------|-----------|-----------|
| 82 |           |           |           |
| C  | -0.737662 | 4.104355  | 5.658399  |
| La | 3.172615  | 4.540446  | 6.838495  |
| Si | 5.438052  | 6.752622  | 7.613258  |
| O  | 5.347799  | 8.245529  | 8.338836  |
| Si | 5.155649  | 8.906950  | 9.836374  |
| O  | 6.632298  | 9.206180  | 10.525128 |
| Si | 8.193365  | 8.675511  | 10.504160 |
| O  | 9.151149  | 10.001372 | 10.682919 |
| O  | 8.424905  | 7.614155  | 11.757675 |
| Si | 7.539599  | 6.580388  | 12.697059 |
| O  | 8.076237  | 6.596152  | 14.250942 |

|    |           |           |           |
|----|-----------|-----------|-----------|
| O  | 7.663939  | 5.051544  | 12.066724 |
| Si | 7.792514  | 4.274571  | 10.617050 |
| O  | 8.474130  | 5.261847  | 9.493042  |
| Si | 8.438677  | 6.449744  | 8.342971  |
| O  | 9.728499  | 6.246457  | 7.353517  |
| Si | 9.897424  | 6.046624  | 5.683501  |
| O  | 5.958609  | 7.049137  | 12.774731 |
| Si | 4.497596  | 6.810490  | 12.040178 |
| O  | 3.296467  | 6.966659  | 13.135940 |
| Si | 3.170005  | 7.627393  | 14.688001 |
| O  | 8.579990  | 7.925588  | 9.080296  |
| O  | 7.053992  | 6.369893  | 7.449983  |
| O  | 6.273792  | 3.787949  | 10.121947 |
| Si | 4.823459  | 4.561813  | 9.997116  |
| O  | 3.651031  | 3.490383  | 9.496681  |
| Si | 2.699981  | 2.359665  | 10.370721 |
| O  | 8.717628  | 2.942830  | 10.824658 |
| Si | 8.672302  | 1.343955  | 10.280310 |
| O  | 4.807624  | 5.621553  | 8.744855  |
| O  | 4.408827  | 5.263249  | 11.427037 |
| O  | 4.288065  | 7.878207  | 10.802100 |
| O  | 4.317654  | 10.307939 | 9.723417  |
| Si | 4.729765  | 11.929266 | 9.491353  |
| O  | 4.534093  | 6.478788  | 6.335636  |
| O  | 1.209011  | 5.562981  | 5.518361  |
| C  | 0.184931  | 5.010861  | 6.469599  |
| C  | -0.598989 | 6.151041  | 7.145655  |
| C  | 0.233618  | 7.339310  | 7.633271  |
| C  | 0.459145  | 8.417286  | 6.567069  |
| C  | 1.336987  | 8.002508  | 5.385085  |
| C  | 0.924682  | 6.702298  | 4.705746  |
| O  | 0.941314  | 4.310014  | 7.353369  |
| N  | 3.977114  | 2.732822  | 5.659740  |
| C  | 5.317133  | 2.728017  | 5.113454  |
| C  | 3.269012  | 1.517492  | 5.326885  |
| H  | 9.010299  | 6.396182  | 14.362042 |
| H  | 3.909541  | 6.775193  | 15.662153 |
| H  | 3.715121  | 9.015610  | 14.704730 |
| H  | 3.768827  | 0.613578  | 5.722261  |
| H  | 8.425969  | 1.303198  | 8.809638  |
| H  | 10.027770 | 9.910893  | 10.297859 |
| H  | 11.363778 | 5.988409  | 5.424484  |
| H  | 9.251160  | 4.775095  | 5.247833  |
| H  | 9.294097  | 7.201812  | 4.958765  |
| H  | 10.002873 | 0.755757  | 10.598441 |
| H  | 7.597210  | 0.597637  | 10.996225 |
| H  | 5.136997  | 12.534874 | 10.791772 |
| H  | 5.840402  | 12.051929 | 8.502685  |
| H  | 3.506500  | 12.605171 | 8.974596  |
| H  | 1.716558  | 7.640747  | 15.013090 |
| H  | 2.204563  | 1.385822  | 9.364104  |
| H  | 3.571773  | 1.692291  | 11.378813 |
| H  | 1.580313  | 3.077039  | 11.035392 |
| H  | 1.494385  | 6.563306  | 3.780358  |
| H  | -0.139535 | 6.702928  | 4.434844  |
| H  | 1.326451  | 8.800293  | 4.630178  |
| H  | 2.381549  | 7.892811  | 5.703680  |
| H  | 0.905947  | 9.301666  | 7.037659  |
| H  | -0.524279 | 8.736969  | 6.192404  |
| H  | 1.192804  | 6.983627  | 8.034625  |
| H  | -0.280905 | 7.803414  | 8.483000  |
| H  | -1.101948 | 5.668853  | 7.990620  |
| H  | -1.395002 | 6.514912  | 6.481951  |

|   |           |          |          |
|---|-----------|----------|----------|
| H | -1.258182 | 4.648699 | 4.862957 |
| H | -1.489055 | 3.664542 | 6.321004 |
| H | -0.151602 | 3.296394 | 5.213406 |
| H | 3.170539  | 1.369235 | 4.235527 |
| H | 2.252574  | 1.531766 | 5.742507 |
| H | 5.843399  | 3.663174 | 5.354780 |
| H | 5.934504  | 1.899636 | 5.507726 |
| H | 5.327168  | 2.633058 | 4.011909 |

TS<sub>E→I</sub>

|    |           |           |           |
|----|-----------|-----------|-----------|
| 82 |           |           |           |
| C  | -3.571841 | -0.432906 | 8.287067  |
| N  | -3.373183 | 0.089101  | 9.618856  |
| C  | -4.416836 | -0.348578 | 10.519564 |
| La | -1.589557 | 1.373609  | 10.310712 |
| O  | 0.287277  | 0.595888  | 9.196773  |
| C  | 1.465258  | -0.120991 | 9.433614  |
| C  | 2.258230  | 0.412726  | 10.628914 |
| C  | 2.974501  | 1.750565  | 10.420334 |
| C  | 2.132128  | 2.934343  | 9.922399  |
| C  | 1.752963  | 2.861064  | 8.436283  |
| C  | 0.332413  | 2.466635  | 8.100714  |
| C  | 0.115231  | 1.841403  | 6.747635  |
| O  | -2.306717 | 3.344668  | 12.121432 |
| Si | -3.516907 | 4.425439  | 11.791134 |
| O  | -4.808422 | 4.209864  | 12.794806 |
| Si | -5.375947 | 4.756834  | 14.253701 |
| O  | -4.887953 | 6.320126  | 14.494496 |
| Si | -3.650299 | 7.156319  | 15.196315 |
| O  | -2.434997 | 7.446130  | 14.107171 |
| Si | -1.793224 | 6.811280  | 12.725995 |
| O  | -0.537924 | 5.793000  | 13.076585 |
| Si | 0.008808  | 4.861672  | 14.334113 |
| O  | -0.491567 | 3.304828  | 14.145051 |
| Si | -1.664763 | 2.392756  | 13.399936 |
| O  | -1.170133 | 1.091947  | 12.622642 |
| O  | -2.964276 | 5.976833  | 11.896167 |
| O  | -1.263916 | 8.055475  | 11.804221 |
| Si | -0.077514 | 8.254773  | 10.619493 |
| O  | -2.896226 | 2.160454  | 14.493640 |
| Si | -3.546179 | 2.814084  | 15.862830 |
| O  | -4.089097 | 1.619397  | 16.843056 |
| Si | -4.119913 | -0.066588 | 16.724187 |
| O  | -2.415583 | 3.688040  | 16.698605 |
| Si | -1.816931 | 5.226764  | 16.805883 |
| O  | -3.029207 | 6.307761  | 16.474388 |
| O  | -4.822178 | 3.796039  | 15.475178 |
| O  | -0.553744 | 5.466875  | 15.770574 |
| O  | -1.214710 | 5.481867  | 18.316030 |
| O  | -7.008754 | 4.695459  | 14.194003 |
| Si | -8.267920 | 5.584166  | 14.886626 |
| O  | -4.309621 | 8.574440  | 15.704801 |
| O  | -0.631475 | 3.015882  | 8.695033  |
| O  | 1.645165  | 4.930235  | 14.323598 |
| Si | 2.832930  | 5.046824  | 15.518631 |
| O  | -3.935517 | 4.052407  | 10.244583 |
| Si | -5.278411 | 4.383755  | 9.261143  |
| H  | -1.775187 | 5.162040  | 19.029238 |
| H  | -4.939635 | -0.487556 | 15.551420 |
| H  | 2.570204  | 4.072154  | 16.616438 |
| H  | -3.673961 | 9.237755  | 15.989237 |
| H  | -4.744846 | -0.554799 | 17.985834 |
| H  | -2.733794 | -0.601704 | 16.598002 |

|   |           |           |           |
|---|-----------|-----------|-----------|
| H | -9.478199 | 4.717892  | 14.821883 |
| H | -7.950922 | 5.920829  | 16.304941 |
| H | -8.489435 | 6.833273  | 14.102975 |
| H | 2.869213  | 6.433919  | 16.065843 |
| H | 4.126890  | 4.730502  | 14.850243 |
| H | -0.436650 | 9.488960  | 9.866291  |
| H | 1.256360  | 8.420890  | 11.265829 |
| H | -0.054089 | 7.079798  | 9.700491  |
| H | -4.817290 | 4.230390  | 7.854278  |
| H | -6.367828 | 3.413995  | 9.563001  |
| H | -5.748153 | 5.778344  | 9.505709  |
| H | 1.221981  | -1.181147 | 9.615658  |
| H | 2.106279  | -0.113917 | 8.532273  |
| H | 3.011210  | -0.335960 | 10.911777 |
| H | 1.572064  | 0.489548  | 11.484135 |
| H | 3.435334  | 2.038430  | 11.373588 |
| H | 3.808976  | 1.606851  | 9.718324  |
| H | 1.226520  | 3.055272  | 10.529809 |
| H | 2.712519  | 3.848948  | 10.087509 |
| H | 1.849838  | 3.857555  | 7.978356  |
| H | 2.449725  | 2.216672  | 7.890504  |
| H | 0.794835  | 1.005192  | 6.577084  |
| H | 0.314793  | 2.606713  | 5.985181  |
| H | -0.918657 | 1.512207  | 6.635351  |
| H | -4.519809 | -0.091622 | 7.830734  |
| H | -2.760545 | -0.113848 | 7.617549  |
| H | -3.589284 | -1.538333 | 8.260749  |
| H | -5.419748 | 0.002910  | 10.214656 |
| H | -4.476930 | -1.449922 | 10.597470 |
| H | -4.244261 | 0.029896  | 11.537933 |

## I

82

|    |           |           |           |
|----|-----------|-----------|-----------|
| C  | -3.079335 | -1.265689 | 8.708303  |
| N  | -3.091976 | -0.403187 | 9.866559  |
| C  | -4.325681 | -0.533088 | 10.607996 |
| La | -1.322926 | 0.852262  | 10.659708 |
| O  | 0.513164  | -0.097854 | 9.894712  |
| C  | 1.744198  | -0.709131 | 9.677646  |
| C  | 2.946178  | 0.135632  | 10.117273 |
| C  | 3.332036  | 1.338989  | 9.245635  |
| C  | 2.307619  | 2.481990  | 9.162477  |
| C  | 1.242440  | 2.261967  | 8.061660  |
| C  | 0.065620  | 3.171043  | 8.272629  |
| C  | 0.018120  | 4.486503  | 7.554020  |
| O  | -2.383722 | 3.085531  | 12.174299 |
| Si | -3.580901 | 4.148214  | 11.752185 |
| O  | -4.859903 | 4.054529  | 12.794650 |
| Si | -5.454497 | 4.768648  | 14.163558 |
| O  | -4.966005 | 6.350090  | 14.237431 |
| Si | -3.732520 | 7.242343  | 14.873189 |
| O  | -2.512604 | 7.410152  | 13.763248 |
| Si | -1.860163 | 6.633931  | 12.457210 |
| O  | -0.570603 | 5.715438  | 12.938041 |
| Si | -0.083458 | 4.883460  | 14.286333 |
| O  | -0.633123 | 3.337024  | 14.244408 |
| Si | -1.769835 | 2.316238  | 13.579978 |
| O  | -1.200756 | 0.938038  | 13.025430 |
| O  | -3.000667 | 5.696607  | 11.716860 |
| O  | -1.354728 | 7.738830  | 11.355714 |
| Si | -0.058536 | 8.813369  | 11.265151 |
| O  | -3.027119 | 2.214906  | 14.667328 |
| Si | -3.660749 | 2.999785  | 15.971598 |

|    |           |           |           |
|----|-----------|-----------|-----------|
| O  | -4.202352 | 1.909873  | 17.068992 |
| Si | -4.381983 | 0.229012  | 17.044504 |
| O  | -2.524187 | 3.944491  | 16.720120 |
| Si | -1.921818 | 5.484322  | 16.689992 |
| O  | -3.120960 | 6.539144  | 16.240718 |
| O  | -4.931108 | 3.953630  | 15.499528 |
| O  | -0.645147 | 5.633147  | 15.653867 |
| O  | -1.352565 | 5.874769  | 18.184794 |
| O  | -7.087764 | 4.711393  | 14.085736 |
| Si | -8.344059 | 5.760086  | 14.502514 |
| O  | -4.389288 | 8.706267  | 15.238313 |
| O  | -0.842692 | 2.856769  | 9.046520  |
| O  | 1.555665  | 4.916532  | 14.282152 |
| Si | 2.742436  | 4.636495  | 15.450120 |
| O  | -4.067928 | 3.700818  | 10.251006 |
| Si | -5.495947 | 3.878196  | 9.363187  |
| H  | -1.864751 | 5.505241  | 18.910237 |
| H  | -5.205368 | -0.190026 | 15.873577 |
| H  | 2.241669  | 3.704711  | 16.501588 |
| H  | -3.803767 | 9.303739  | 15.712633 |
| H  | -5.079628 | -0.126776 | 18.312676 |
| H  | -3.045991 | -0.431123 | 16.993900 |
| H  | -9.590901 | 4.944552  | 14.485988 |
| H  | -8.121008 | 6.329662  | 15.863080 |
| H  | -8.440241 | 6.860057  | 13.499846 |
| H  | 3.140756  | 5.934840  | 16.066996 |
| H  | 3.909082  | 4.034448  | 14.743707 |
| H  | -0.546191 | 10.028580 | 10.553499 |
| H  | 0.427552  | 9.176172  | 12.628464 |
| H  | 1.048370  | 8.183904  | 10.486571 |
| H  | -5.126128 | 3.706775  | 7.930228  |
| H  | -6.479628 | 2.835790  | 9.769996  |
| H  | -6.071523 | 5.237589  | 9.583347  |
| H  | 1.790897  | -1.665849 | 10.223927 |
| H  | 1.866769  | -0.967057 | 8.608172  |
| H  | 3.820695  | -0.528466 | 10.162378 |
| H  | 2.764541  | 0.473396  | 11.147018 |
| H  | 4.264352  | 1.753753  | 9.649213  |
| H  | 3.575464  | 0.995850  | 8.229856  |
| H  | 1.816472  | 2.594998  | 10.136379 |
| H  | 2.825656  | 3.428918  | 8.966308  |
| H  | 1.692556  | 2.432565  | 7.077739  |
| H  | 0.879717  | 1.232760  | 8.136572  |
| H  | -0.109021 | 4.301994  | 6.480135  |
| H  | 0.970945  | 5.014862  | 7.668743  |
| H  | -0.804933 | 5.100779  | 7.920005  |
| H  | -3.878247 | -1.016667 | 7.984719  |
| H  | -2.123307 | -1.184798 | 8.173407  |
| H  | -3.213679 | -2.332692 | 8.968290  |
| H  | -5.212793 | -0.237001 | 10.017730 |
| H  | -4.509903 | -1.566835 | 10.956421 |
| H  | -4.317061 | 0.104324  | 11.505080 |

- (CH<sub>3</sub> or NMe<sub>2</sub>)(BH<sub>4</sub>)La@c-2

(NMe<sub>2</sub>)(BH<sub>4</sub>)La@c-2

65

|    |          |           |           |
|----|----------|-----------|-----------|
| O  | 3.040881 | 6.959213  | 11.088640 |
| Si | 2.357267 | 6.512474  | 9.633828  |
| O  | 6.883568 | 10.176909 | 9.296529  |
| Si | 0.835638 | 3.874403  | 9.194667  |
| O  | 3.444803 | 6.836165  | 8.436318  |

|    |           |           |           |
|----|-----------|-----------|-----------|
| H  | 0.499995  | 4.159600  | 7.769780  |
| Si | 3.780731  | 7.975500  | 7.290355  |
| O  | 4.852266  | 9.074341  | 7.920568  |
| Si | 5.307281  | 9.756705  | 9.355217  |
| O  | 4.388224  | 11.083638 | 9.692125  |
| Si | 2.990158  | 11.859538 | 9.262974  |
| O  | 2.458671  | 11.275541 | 7.810109  |
| Si | 1.503811  | 10.085366 | 7.169289  |
| O  | 2.409073  | 8.755547  | 6.796470  |
| O  | 4.452822  | 7.194223  | 6.010928  |
| O  | 0.957828  | 7.342553  | 9.371926  |
| Si | 0.016002  | 8.695070  | 9.524514  |
| O  | -1.553379 | 8.236718  | 9.497650  |
| Si | -2.869542 | 8.490909  | 10.531226 |
| O  | 2.065658  | 4.910375  | 9.722370  |
| Si | 8.150240  | 9.955858  | 8.197304  |
| Si | 3.868341  | 8.284821  | 11.596801 |
| O  | 4.361679  | 8.054762  | 13.177032 |
| Si | 5.262131  | 6.760047  | 13.880740 |
| O  | 2.893128  | 9.591768  | 11.819031 |
| Si | 1.460572  | 10.508677 | 11.584648 |
| O  | 1.837229  | 11.646219 | 10.433982 |
| La | 2.799356  | 9.990738  | 14.460755 |
| B  | 2.212019  | 8.224221  | 16.416279 |
| N  | 4.344477  | 11.522560 | 15.122985 |
| C  | 4.436079  | 12.835303 | 14.514399 |
| C  | 5.292891  | 11.368991 | 16.207541 |
| O  | 1.184081  | 11.014152 | 13.073957 |
| O  | 5.117253  | 8.652693  | 10.595491 |
| O  | 3.302560  | 13.456472 | 9.094784  |
| Si | 2.686769  | 14.874782 | 9.776268  |
| O  | 0.329077  | 9.468621  | 10.953440 |
| O  | 0.309320  | 9.707169  | 8.250866  |
| O  | 0.851945  | 10.574096 | 5.741407  |
| H  | 4.275895  | 7.601872  | 5.157875  |
| H  | 0.212806  | 11.289735 | 5.805606  |
| H  | -4.036489 | 7.838934  | 9.874280  |
| H  | -2.606819 | 7.865224  | 11.858637 |
| H  | -3.119446 | 9.952349  | 10.692759 |
| H  | -0.371258 | 4.055264  | 10.050790 |
| H  | 1.369139  | 2.491872  | 9.336030  |
| H  | 3.418240  | 15.996991 | 9.125391  |
| H  | 1.225048  | 14.985419 | 9.498076  |
| H  | 2.926393  | 14.887897 | 11.247828 |
| H  | 8.391356  | 8.499970  | 7.981841  |
| H  | 7.821535  | 10.615976 | 6.901139  |
| H  | 9.346594  | 10.592809 | 8.813437  |
| H  | 6.065738  | 7.371624  | 14.970122 |
| H  | 4.308724  | 5.744769  | 14.394750 |
| H  | 6.137738  | 6.192940  | 12.817286 |
| H  | 5.141048  | 12.117719 | 17.004025 |
| H  | 5.196604  | 10.379512 | 16.673056 |
| H  | 6.337071  | 11.471615 | 15.864464 |
| H  | 4.255397  | 13.646881 | 15.240661 |
| H  | 5.426471  | 13.019928 | 14.063798 |
| H  | 3.690986  | 12.951345 | 13.714406 |
| H  | 3.434848  | 8.218581  | 16.198739 |
| H  | 1.915579  | 7.472839  | 17.303293 |
| H  | 1.900971  | 9.399216  | 16.698990 |
| H  | 1.632540  | 7.924150  | 15.361161 |

**D**

|    |           |           |           |
|----|-----------|-----------|-----------|
| C  | 2.943458  | 5.333070  | 12.175371 |
| N  | 1.700820  | 5.690294  | 11.525320 |
| C  | 0.571677  | 5.532582  | 12.413298 |
| La | 1.712777  | 6.298222  | 9.318535  |
| O  | 0.193297  | 9.224979  | 10.666114 |
| C  | -0.887580 | 10.099030 | 11.066207 |
| C  | -1.615658 | 10.730418 | 9.889876  |
| C  | -0.918893 | 11.952607 | 9.289005  |
| C  | 0.481937  | 11.686841 | 8.737752  |
| C  | 1.473282  | 11.131920 | 9.780802  |
| C  | 1.273716  | 9.664097  | 10.039155 |
| O  | 2.086435  | 8.824588  | 9.656271  |
| B  | -0.709013 | 6.662984  | 8.099346  |
| Si | 4.083622  | 4.657878  | 7.815837  |
| O  | 5.450409  | 3.950069  | 8.441977  |
| Si | 6.036872  | 2.557227  | 9.103789  |
| O  | 7.163393  | 2.921184  | 10.237788 |
| Si | 7.893407  | 4.349931  | 10.757904 |
| O  | 3.812531  | 6.162102  | 8.275851  |
| O  | 2.707754  | 3.847720  | 8.437299  |
| Si | 1.744886  | 2.521503  | 8.170224  |
| O  | 1.638824  | 2.202103  | 6.552195  |
| Si | 2.389374  | 1.300279  | 5.382465  |
| O  | 2.961963  | -0.099073 | 6.044413  |
| Si | 4.349006  | -0.709226 | 6.714178  |
| O  | 4.446205  | -2.331861 | 6.467678  |
| O  | 0.280537  | 2.964621  | 8.759068  |
| Si | -1.319920 | 2.506793  | 8.427519  |
| O  | 4.092468  | 4.400887  | 6.171201  |
| Si | 4.704190  | 3.371993  | 5.034634  |
| O  | 3.614953  | 2.171322  | 4.693191  |
| O  | 2.313074  | 1.195898  | 8.969747  |
| Si | 3.726264  | 0.518003  | 9.498889  |
| O  | 4.818851  | 1.710869  | 9.831512  |
| O  | 4.334460  | -0.509137 | 8.351274  |
| O  | 3.411016  | -0.324583 | 10.864487 |
| Si | 3.777663  | -1.880731 | 11.410436 |
| O  | 5.642569  | 0.056874  | 6.022194  |
| Si | 6.654108  | 1.325996  | 6.315510  |
| O  | 8.119184  | 0.874374  | 5.718117  |
| O  | 6.123219  | 2.696551  | 5.549605  |
| O  | 6.754487  | 1.624525  | 7.940542  |
| O  | 4.991761  | 4.205618  | 3.651960  |
| Si | 4.902148  | 5.841207  | 3.241936  |
| O  | 1.291397  | 0.903602  | 4.234833  |
| Si | 0.876334  | 1.516002  | 2.717627  |
| H  | 4.643770  | -2.592376 | 5.563239  |
| H  | 8.788476  | 1.564791  | 5.724496  |
| H  | 5.348567  | 5.935103  | 1.822933  |
| H  | 3.500254  | 6.334797  | 3.368395  |
| H  | 5.805621  | 6.647567  | 4.113450  |
| H  | 0.801459  | 3.005520  | 2.755226  |
| H  | 1.883391  | 1.084453  | 1.705111  |
| H  | -0.458033 | 0.943225  | 2.384317  |
| H  | 8.919457  | 3.951220  | 11.762409 |
| H  | 8.549201  | 5.046958  | 9.612411  |
| H  | 6.886955  | 5.252148  | 11.388242 |
| H  | 3.015095  | -2.892447 | 10.623868 |
| H  | 5.241651  | -2.141865 | 11.294241 |
| H  | 3.361678  | -1.925622 | 12.840564 |
| H  | -2.148558 | 3.045073  | 9.539590  |
| H  | -1.753131 | 3.070033  | 7.119991  |
| H  | -1.406778 | 1.016556  | 8.396118  |



|   |           |           |           |
|---|-----------|-----------|-----------|
| H | -1.547269 | 9.427815  | 11.616993 |
| H | -0.501926 | 10.849981 | 11.766579 |
| H | -2.608186 | 11.028366 | 10.249083 |
| H | -1.780445 | 9.954243  | 9.132468  |
| H | -1.543864 | 12.359192 | 8.486024  |
| H | -0.856048 | 12.738649 | 10.055140 |
| H | 0.432919  | 10.998652 | 7.885148  |
| H | 0.898189  | 12.624071 | 8.353548  |
| H | 2.500204  | 11.235831 | 9.426835  |
| H | 1.381582  | 11.691939 | 10.720426 |
| H | -0.010837 | 7.691029  | 8.094589  |
| H | -0.038676 | 5.767968  | 7.560308  |
| H | -0.912211 | 6.342323  | 9.275019  |
| H | -1.737895 | 6.841733  | 7.500547  |
| H | 0.646668  | 6.177792  | 13.308111 |
| H | -0.364097 | 5.791762  | 11.901742 |
| H | 0.465958  | 4.495368  | 12.778901 |
| H | 3.156393  | 5.964147  | 13.057663 |
| H | 2.957150  | 4.283865  | 12.520365 |
| H | 3.795441  | 5.452299  | 11.489102 |

TS<sub>D→E</sub>

83

|    |           |           |           |
|----|-----------|-----------|-----------|
| C  | 2.585176  | 6.245831  | 11.321143 |
| N  | 1.400832  | 6.533374  | 10.536581 |
| C  | 0.215897  | 6.017926  | 11.186703 |
| La | 1.628743  | 6.793443  | 8.135057  |
| O  | 0.292478  | 8.895315  | 9.503312  |
| C  | -0.954443 | 9.156328  | 10.180307 |
| C  | -1.093636 | 10.623578 | 10.558112 |
| C  | -0.306124 | 11.043472 | 11.801287 |
| C  | 1.200578  | 10.781622 | 11.739136 |
| C  | 1.569599  | 9.291304  | 11.594270 |
| C  | 1.482622  | 8.820022  | 10.170996 |
| O  | 2.471447  | 8.792009  | 9.402404  |
| B  | -0.571677 | 6.812325  | 6.568110  |
| Si | 3.995786  | 4.904300  | 7.030026  |
| O  | 5.371031  | 4.427544  | 7.828876  |
| Si | 5.942491  | 3.268759  | 8.858357  |
| O  | 7.046084  | 3.934792  | 9.869470  |
| Si | 7.730814  | 5.471121  | 10.017814 |
| O  | 3.676578  | 6.469229  | 7.059873  |
| O  | 2.637434  | 4.281330  | 7.883576  |
| Si | 1.671212  | 2.927274  | 7.940997  |
| O  | 1.598586  | 2.194164  | 6.465921  |
| Si | 2.352294  | 0.999190  | 5.596405  |
| O  | 2.922092  | -0.153540 | 6.631257  |
| Si | 4.306363  | -0.548973 | 7.451621  |
| O  | 4.414928  | -2.175276 | 7.662461  |
| O  | 0.197876  | 3.524000  | 8.351947  |
| Si | -1.396660 | 3.038880  | 8.010837  |
| O  | 3.999192  | 4.191151  | 5.531219  |
| Si | 4.650550  | 2.911439  | 4.713047  |
| O  | 3.581251  | 1.645175  | 4.698227  |
| O  | 2.213147  | 1.871073  | 9.084159  |
| Si | 3.637933  | 1.391976  | 9.781961  |
| O  | 4.700922  | 2.655414  | 9.762122  |
| O  | 4.269306  | 0.095727  | 8.970635  |
| O  | 3.326297  | 0.966138  | 11.329405 |
| Si | 3.705458  | -0.368351 | 12.295606 |
| O  | 5.604082  | 0.005720  | 6.587688  |
| Si | 6.600679  | 1.319488  | 6.528754  |
| O  | 8.075494  | 0.738511  | 6.090703  |

|    |           |           |           |
|----|-----------|-----------|-----------|
| O  | 6.065990  | 2.423621  | 5.414869  |
| O  | 6.675279  | 2.052003  | 8.011810  |
| O  | 4.954235  | 3.351110  | 3.165511  |
| Si | 4.777603  | 4.794694  | 2.302110  |
| O  | 1.253706  | 0.303588  | 4.604248  |
| Si | 0.942869  | 0.348342  | 2.944256  |
| H  | 4.678336  | -2.668831 | 6.880161  |
| H  | 8.729925  | 1.410037  | 5.877296  |
| H  | 5.261636  | 4.507350  | 0.922430  |
| H  | 3.344692  | 5.205405  | 2.268773  |
| H  | 5.605027  | 5.869888  | 2.921552  |
| H  | 0.859954  | 1.759117  | 2.467535  |
| H  | 2.018618  | -0.375621 | 2.206817  |
| H  | -0.363733 | -0.339365 | 2.747983  |
| H  | 8.712290  | 5.380156  | 11.135205 |
| H  | 8.429313  | 5.851298  | 8.755352  |
| H  | 6.680603  | 6.479623  | 10.340255 |
| H  | 2.972436  | -1.573575 | 11.812842 |
| H  | 5.175203  | -0.621120 | 12.277660 |
| H  | 3.262363  | -0.016730 | 13.674051 |
| H  | -2.270898 | 3.838082  | 8.911456  |
| H  | -1.718327 | 3.299885  | 6.582705  |
| H  | -1.537459 | 1.584932  | 8.317760  |
| H  | -1.708645 | 8.867796  | 9.445881  |
| H  | -1.050107 | 8.497216  | 11.049008 |
| H  | -2.159712 | 10.819524 | 10.728326 |
| H  | -0.802346 | 11.227444 | 9.689711  |
| H  | -0.475243 | 12.111366 | 11.982963 |
| H  | -0.716755 | 10.517456 | 12.675017 |
| H  | 1.658699  | 11.354257 | 10.923260 |
| H  | 1.657188  | 11.149009 | 12.664864 |
| H  | 2.603380  | 9.122196  | 11.899508 |
| H  | 0.929650  | 8.681536  | 12.241146 |
| H  | -0.001202 | 7.917269  | 6.608035  |
| H  | 0.253738  | 5.982641  | 6.159102  |
| H  | -0.874179 | 6.511740  | 7.734298  |
| H  | -1.541787 | 6.850637  | 5.861000  |
| H  | 0.036320  | 6.485390  | 12.175654 |
| H  | -0.676345 | 6.186628  | 10.571184 |
| H  | 0.276757  | 4.931766  | 11.369560 |
| H  | 2.514615  | 6.643127  | 12.350864 |
| H  | 2.778222  | 5.164289  | 11.417107 |
| H  | 3.471692  | 6.700670  | 10.860284 |

## E

83

|    |           |           |           |
|----|-----------|-----------|-----------|
| C  | 3.219482  | 6.474770  | 11.161898 |
| N  | 1.796122  | 6.475082  | 10.807090 |
| C  | 1.050606  | 5.607736  | 11.721171 |
| La | 1.503029  | 6.757174  | 8.081596  |
| O  | -0.087957 | 7.499831  | 10.085594 |
| C  | -1.214401 | 8.375342  | 10.202382 |
| C  | -0.960489 | 9.865801  | 9.992390  |
| C  | -0.436491 | 10.598947 | 11.229427 |
| C  | 0.970639  | 10.196934 | 11.667214 |
| C  | 1.155795  | 8.698285  | 11.912001 |
| C  | 1.240776  | 7.871609  | 10.624969 |
| O  | 1.950548  | 8.442983  | 9.638574  |
| B  | -0.395395 | 7.318408  | 6.246575  |
| Si | 4.043811  | 5.106603  | 6.967584  |
| O  | 5.405831  | 4.626770  | 7.795273  |
| Si | 5.836128  | 3.443752  | 8.867793  |
| O  | 6.932436  | 4.042161  | 9.927059  |

|    |           |           |           |
|----|-----------|-----------|-----------|
| Si | 7.944148  | 5.395794  | 9.942072  |
| O  | 3.628823  | 6.642948  | 7.041636  |
| O  | 2.725376  | 4.376271  | 7.791323  |
| Si | 1.590114  | 3.193185  | 7.930701  |
| O  | 1.333663  | 2.374468  | 6.528228  |
| Si | 2.148876  | 1.200015  | 5.669896  |
| O  | 2.690697  | 0.062350  | 6.733829  |
| Si | 4.047562  | -0.360301 | 7.585503  |
| O  | 4.082795  | -1.978792 | 7.863707  |
| O  | 0.253735  | 4.119692  | 8.285170  |
| Si | -1.420437 | 3.752955  | 8.131110  |
| O  | 4.099424  | 4.426296  | 5.451994  |
| Si | 4.586072  | 3.021651  | 4.729956  |
| O  | 3.398928  | 1.870037  | 4.829597  |
| O  | 1.989043  | 2.174833  | 9.161637  |
| Si | 3.432662  | 1.693578  | 9.841870  |
| O  | 4.517241  | 2.934131  | 9.732777  |
| O  | 4.011202  | 0.347706  | 9.077957  |
| O  | 3.136674  | 1.355439  | 11.413212 |
| Si | 3.526808  | 0.075467  | 12.450298 |
| O  | 5.377424  | 0.101951  | 6.718496  |
| Si | 6.428270  | 1.371338  | 6.617196  |
| O  | 7.883504  | 0.712328  | 6.229245  |
| O  | 5.960370  | 2.443822  | 5.445826  |
| O  | 6.503768  | 2.156925  | 8.072428  |
| O  | 4.888909  | 3.307755  | 3.147943  |
| Si | 4.878040  | 4.704238  | 2.190641  |
| O  | 1.089556  | 0.504759  | 4.639921  |
| Si | 0.869207  | 0.497847  | 2.962801  |
| H  | 4.383809  | -2.512835 | 7.122632  |
| H  | 8.550420  | 1.339896  | 5.935703  |
| H  | 5.300019  | 4.266559  | 0.830410  |
| H  | 3.506368  | 5.285290  | 2.144154  |
| H  | 5.843883  | 5.703956  | 2.730650  |
| H  | 0.786822  | 1.894636  | 2.447625  |
| H  | 1.998169  | -0.223724 | 2.307896  |
| H  | -0.411838 | -0.220963 | 2.718935  |
| H  | 8.880294  | 5.201086  | 11.084347 |
| H  | 8.708261  | 5.486534  | 8.663398  |
| H  | 7.138626  | 6.634146  | 10.142084 |
| H  | 2.771780  | -1.146813 | 12.053358 |
| H  | 4.993613  | -0.189764 | 12.412988 |
| H  | 3.116673  | 0.515188  | 13.813218 |
| H  | -2.127684 | 4.715695  | 9.014352  |
| H  | -1.829884 | 3.899776  | 6.711543  |
| H  | -1.624852 | 2.353789  | 8.604318  |
| H  | -1.907252 | 8.006726  | 9.440627  |
| H  | -1.685228 | 8.214029  | 11.184090 |
| H  | -1.924372 | 10.307250 | 9.707896  |
| H  | -0.287939 | 10.006097 | 9.139167  |
| H  | -0.453584 | 11.679088 | 11.038966 |
| H  | -1.138786 | 10.425997 | 12.058752 |
| H  | 1.698420  | 10.502081 | 10.908049 |
| H  | 1.221206  | 10.736628 | 12.588677 |
| H  | 2.104456  | 8.547854  | 12.439502 |
| H  | 0.368308  | 8.300236  | 12.564569 |
| H  | 0.149322  | 8.341284  | 6.698115  |
| H  | 0.485335  | 6.616366  | 5.731852  |
| H  | -0.857170 | 6.693309  | 7.219144  |
| H  | -1.262954 | 7.597215  | 5.464581  |
| H  | 1.169384  | 5.916865  | 12.771018 |
| H  | -0.007635 | 5.622679  | 11.462870 |
| H  | 1.424404  | 4.583532  | 11.630235 |

|   |          |          |           |
|---|----------|----------|-----------|
| H | 3.385058 | 6.747995 | 12.215807 |
| H | 3.625231 | 5.470432 | 11.010541 |
| H | 3.756723 | 7.183214 | 10.529696 |

TS<sub>E→F</sub>

83

|    |           |           |           |
|----|-----------|-----------|-----------|
| B  | -3.453634 | 5.674549  | 10.216430 |
| La | -0.941353 | 5.490065  | 11.162026 |
| O  | -0.649257 | 6.830505  | 13.474421 |
| Si | -1.109843 | 8.405799  | 13.309790 |
| O  | -1.503189 | 8.452475  | 11.700828 |
| Si | -2.622996 | 9.443479  | 10.855806 |
| O  | 0.199741  | 4.183458  | 9.414410  |
| C  | 1.330587  | 4.696663  | 9.704074  |
| C  | 2.407440  | 4.784241  | 8.646222  |
| C  | 1.890003  | 5.057015  | 7.232625  |
| C  | 1.756340  | 6.535727  | 6.865301  |
| C  | 0.779164  | 7.364339  | 7.703018  |
| C  | 1.182767  | 7.582839  | 9.163638  |
| O  | 0.896029  | 6.522443  | 10.041862 |
| Si | -0.712354 | 5.369494  | 14.374913 |
| O  | 0.703074  | 5.320819  | 15.247388 |
| Si | 1.886778  | 6.354816  | 15.744294 |
| O  | 1.962543  | 7.665614  | 14.732601 |
| Si | 1.505024  | 9.246155  | 14.645590 |
| O  | 0.161566  | 9.395854  | 13.665791 |
| O  | -0.895953 | 4.298699  | 13.208351 |
| N  | 1.708293  | 4.461369  | 11.081891 |
| C  | 2.903527  | 5.141955  | 11.572270 |
| C  | 1.714584  | 3.037525  | 11.449589 |
| O  | -1.970884 | 5.512089  | 15.449496 |
| Si | -2.312958 | 6.200863  | 16.911113 |
| O  | -3.504389 | 5.357769  | 17.648922 |
| Si | -4.564142 | 4.138295  | 17.142073 |
| O  | -2.426283 | 8.786847  | 14.220747 |
| Si | -2.728964 | 9.147758  | 15.817403 |
| O  | -4.157968 | 9.935334  | 15.872840 |
| Si | -4.742019 | 11.312328 | 16.661823 |
| O  | -2.806355 | 7.767848  | 16.709810 |
| O  | -1.523236 | 10.126077 | 16.390898 |
| Si | -0.098381 | 10.003507 | 17.215831 |
| O  | 0.043919  | 11.409245 | 18.056821 |
| O  | -0.983492 | 6.179182  | 17.898665 |
| Si | 0.318077  | 7.114456  | 18.305494 |
| O  | 0.829178  | 6.710745  | 19.816296 |
| O  | -0.115030 | 8.714511  | 18.252349 |
| O  | 1.599956  | 6.862374  | 17.294887 |
| O  | 1.161662  | 9.828278  | 16.153094 |
| O  | 3.327721  | 5.577225  | 15.685485 |
| Si | 4.503848  | 5.186897  | 16.835271 |
| O  | 2.732527  | 10.107088 | 13.991498 |
| Si | 2.859677  | 11.517983 | 13.071936 |
| H  | 2.534437  | 11.218910 | 11.647208 |
| H  | -3.802505 | 2.887947  | 16.860541 |
| H  | -5.505656 | 3.921053  | 18.276256 |
| H  | 0.124461  | 6.452603  | 20.417888 |
| H  | 0.792187  | 11.447729 | 18.659816 |
| H  | -5.310427 | 4.573062  | 15.927047 |
| H  | -6.218890 | 11.303744 | 16.471701 |
| H  | -4.406611 | 11.257069 | 18.113982 |
| H  | -4.149811 | 12.534942 | 16.046927 |
| H  | 5.046148  | 6.427660  | 17.460609 |
| H  | 3.926814  | 4.296767  | 17.883019 |

|   |           |           |           |
|---|-----------|-----------|-----------|
| H | 5.582192  | 4.474849  | 16.093316 |
| H | 1.933613  | 12.564923 | 13.593944 |
| H | 4.272735  | 11.973229 | 13.189840 |
| H | -2.466876 | 10.839245 | 11.360410 |
| H | -2.231659 | 9.362924  | 9.424456  |
| H | -4.004262 | 8.950310  | 11.082931 |
| H | 0.655816  | 8.470093  | 9.545260  |
| H | 2.259530  | 7.825077  | 9.206279  |
| H | 0.695251  | 8.355710  | 7.237305  |
| H | -0.225696 | 6.922833  | 7.671158  |
| H | 1.452199  | 6.597417  | 5.812676  |
| H | 2.748341  | 7.009176  | 6.918532  |
| H | 0.927212  | 4.547981  | 7.113737  |
| H | 2.580224  | 4.592253  | 6.518675  |
| H | 2.888175  | 3.794325  | 8.673917  |
| H | 3.177386  | 5.504008  | 8.940522  |
| H | 3.828546  | 4.715769  | 11.155285 |
| H | 2.840561  | 6.200441  | 11.321160 |
| H | 2.947372  | 5.038472  | 12.659529 |
| H | 2.622228  | 2.529565  | 11.088061 |
| H | 1.672213  | 2.957440  | 12.537726 |
| H | 0.840990  | 2.539391  | 11.030150 |
| H | -2.980333 | 4.530853  | 10.097512 |
| H | -4.573893 | 5.734967  | 9.790611  |
| H | -3.405100 | 5.965988  | 11.422824 |
| H | -2.694069 | 6.451210  | 9.610478  |

**F**  
83

|    |           |           |           |
|----|-----------|-----------|-----------|
| B  | -3.046277 | 6.023787  | 9.967362  |
| La | -0.650922 | 5.812735  | 11.225525 |
| O  | -0.692472 | 7.446104  | 13.466207 |
| Si | -1.403557 | 8.944785  | 13.529698 |
| O  | -1.934923 | 9.209496  | 12.002728 |
| Si | -3.328702 | 9.903753  | 11.322146 |
| O  | 0.204607  | 3.691142  | 10.265565 |
| C  | 1.247076  | 3.257623  | 9.713072  |
| C  | 2.353443  | 4.226570  | 9.376142  |
| C  | 2.114843  | 4.923484  | 8.021930  |
| C  | 2.934892  | 6.212155  | 7.849320  |
| C  | 2.311913  | 7.502452  | 8.402312  |
| C  | 2.138409  | 7.621414  | 9.920231  |
| O  | 1.096191  | 6.848602  | 10.430026 |
| Si | -0.370624 | 6.076748  | 14.451869 |
| O  | 1.045942  | 6.346065  | 15.274604 |
| Si | 2.088769  | 7.506723  | 15.790660 |
| O  | 1.934184  | 8.864700  | 14.857033 |
| Si | 1.084886  | 10.278444 | 14.846063 |
| O  | -0.301763 | 10.102892 | 13.950914 |
| O  | -0.337359 | 4.902641  | 13.373001 |
| N  | 1.347159  | 1.951672  | 9.412683  |
| C  | 2.461838  | 1.349041  | 8.701763  |
| C  | 0.284664  | 1.029634  | 9.791087  |
| O  | -1.592627 | 5.997490  | 15.578267 |
| Si | -1.956636 | 6.474503  | 17.115046 |
| O  | -2.884693 | 5.334385  | 17.839553 |
| Si | -3.694281 | 3.963161  | 17.274025 |
| O  | -2.667656 | 8.950076  | 14.591650 |
| Si | -2.986936 | 9.269455  | 16.185503 |
| O  | -4.536167 | 9.782634  | 16.291171 |
| Si | -5.330408 | 11.021891 | 17.119512 |
| O  | -2.793272 | 7.903246  | 17.088571 |
| O  | -1.975157 | 10.461118 | 16.732655 |

|    |           |           |           |
|----|-----------|-----------|-----------|
| Si | -0.517945 | 10.606363 | 17.493615 |
| O  | -0.625063 | 11.984274 | 18.386284 |
| O  | -0.588473 | 6.661042  | 18.028529 |
| Si | 0.515687  | 7.824972  | 18.434711 |
| O  | 1.163418  | 7.472684  | 19.906886 |
| O  | -0.235541 | 9.302251  | 18.472662 |
| O  | 1.783391  | 7.871671  | 17.379500 |
| O  | 0.712876  | 10.728748 | 16.391844 |
| O  | 3.630269  | 6.968972  | 15.655017 |
| Si | 4.845089  | 6.582716  | 16.760456 |
| O  | 2.007790  | 11.451707 | 14.172680 |
| Si | 1.902433  | 12.392054 | 12.775507 |
| H  | 1.828328  | 11.521721 | 11.566131 |
| H  | -2.711030 | 2.918348  | 16.866073 |
| H  | -4.515249 | 3.469875  | 18.416088 |
| H  | 0.527473  | 7.149929  | 20.552254 |
| H  | 0.189597  | 12.243569 | 18.826839 |
| H  | -4.575332 | 4.313087  | 16.122786 |
| H  | -6.787868 | 10.742538 | 16.987859 |
| H  | -4.935797 | 11.024124 | 18.558107 |
| H  | -5.004244 | 12.339013 | 16.500392 |
| H  | 5.249802  | 7.793418  | 17.532115 |
| H  | 4.382441  | 5.515863  | 17.694899 |
| H  | 5.996190  | 6.086857  | 15.953385 |
| H  | 0.701738  | 13.275479 | 12.836620 |
| H  | 3.141837  | 13.217953 | 12.735316 |
| H  | -3.579661 | 11.222663 | 11.977252 |
| H  | -3.033135 | 10.101531 | 9.878168  |
| H  | -4.497588 | 9.005325  | 11.516776 |
| H  | 1.963140  | 8.683019  | 10.156896 |
| H  | 3.091321  | 7.352756  | 10.411677 |
| H  | 2.949215  | 8.337316  | 8.078938  |
| H  | 1.331631  | 7.665791  | 7.933988  |
| H  | 3.102245  | 6.363421  | 6.775553  |
| H  | 3.933932  | 6.070086  | 8.286789  |
| H  | 1.049160  | 5.156910  | 7.916274  |
| H  | 2.356489  | 4.222390  | 7.212480  |
| H  | 3.341768  | 3.759567  | 9.400422  |
| H  | 2.318052  | 4.985030  | 10.162121 |
| H  | 2.073151  | 0.709174  | 7.902873  |
| H  | 3.098301  | 2.104561  | 8.246585  |
| H  | 3.065155  | 0.729382  | 9.375812  |
| H  | 0.717777  | 0.171837  | 10.315597 |
| H  | -0.419695 | 1.541041  | 10.443200 |
| H  | -0.242109 | 0.669744  | 8.900288  |
| H  | -2.359258 | 5.097319  | 9.502566  |
| H  | -4.098678 | 6.119383  | 9.395181  |
| H  | -3.211287 | 5.800092  | 11.177113 |
| H  | -2.377856 | 7.064417  | 9.853779  |

(CH<sub>3</sub>)(BH<sub>4</sub>)La@c-2

|    |           |           |           |
|----|-----------|-----------|-----------|
| 60 |           |           |           |
| B  | -0.364442 | 7.915450  | 7.530435  |
| La | 1.276488  | 6.000750  | 8.403991  |
| C  | 1.633957  | 6.364944  | 10.837964 |
| Si | 3.509033  | 4.102377  | 7.118997  |
| O  | 3.519332  | 3.698984  | 5.509791  |
| Si | 3.638903  | 2.319700  | 4.599158  |
| O  | 4.037653  | 2.723903  | 3.067394  |
| Si | 4.267917  | 4.187079  | 2.247957  |
| O  | 2.195412  | 1.512605  | 4.584907  |
| Si | 0.778452  | 0.987923  | 5.230177  |
| O  | 1.012638  | -0.412123 | 6.074589  |

|    |           |           |           |
|----|-----------|-----------|-----------|
| Si | 2.215476  | -1.242973 | 6.843964  |
| O  | 1.790563  | -2.825367 | 6.739312  |
| O  | -0.345340 | 0.779085  | 4.068118  |
| Si | -0.911079 | -0.527793 | 3.151136  |
| O  | 0.169702  | 2.139655  | 6.278831  |
| Si | 0.629420  | 2.644775  | 7.770879  |
| O  | 0.745009  | 1.407200  | 8.842439  |
| Si | 2.033475  | 0.514003  | 9.429417  |
| O  | 1.620734  | -0.045924 | 10.905752 |
| Si | 2.106413  | 0.260258  | 12.497835 |
| O  | 4.806827  | 1.328806  | 5.218928  |
| Si | 4.980004  | 0.017983  | 6.214472  |
| O  | 6.266098  | -0.892444 | 5.748123  |
| O  | 5.175317  | 0.548347  | 7.771613  |
| Si | 4.796484  | 1.814684  | 8.761442  |
| O  | 5.972365  | 1.966886  | 9.888253  |
| Si | 6.940817  | 3.248263  | 10.421583 |
| O  | 3.673319  | -0.985176 | 6.110182  |
| O  | 4.681901  | 3.223566  | 7.898118  |
| O  | 3.359612  | 1.497154  | 9.531034  |
| O  | 2.012278  | 3.535039  | 7.754999  |
| O  | 3.396858  | 5.660442  | 7.450830  |
| O  | -0.430115 | 3.833569  | 8.299648  |
| Si | -2.157367 | 3.819985  | 8.383591  |
| O  | 2.319050  | -0.760016 | 8.426609  |
| H  | 2.455959  | -3.450104 | 7.042702  |
| H  | 7.091790  | -0.411513 | 5.639668  |
| H  | 4.557283  | 3.822242  | 0.833406  |
| H  | 3.033131  | 5.019303  | 2.325924  |
| H  | 5.422144  | 4.924271  | 2.837638  |
| H  | -1.597299 | 0.061349  | 1.968585  |
| H  | 0.229747  | -1.384872 | 2.718509  |
| H  | -1.872809 | -1.323041 | 3.966174  |
| H  | 7.741535  | 2.710667  | 11.556529 |
| H  | 7.843663  | 3.696070  | 9.322185  |
| H  | 6.088641  | 4.382334  | 10.879872 |
| H  | 1.211359  | -0.554368 | 13.364703 |
| H  | 3.526861  | -0.152286 | 12.682653 |
| H  | 1.949255  | 1.710706  | 12.808198 |
| H  | -2.504396 | 4.833315  | 9.412891  |
| H  | -2.697992 | 4.177909  | 7.047370  |
| H  | -2.580446 | 2.453411  | 8.794876  |
| H  | -0.111505 | 8.088092  | 8.731455  |
| H  | 0.717315  | 7.884026  | 6.913639  |
| H  | -0.868095 | 6.777457  | 7.419310  |
| H  | 0.696698  | 6.487711  | 11.401318 |
| H  | 2.172802  | 5.516631  | 11.290636 |
| H  | 2.238198  | 7.261516  | 11.044278 |
| H  | -1.090134 | 8.759921  | 7.086218  |

## G

78

|    |          |          |           |
|----|----------|----------|-----------|
| H  | 1.671717 | 5.565446 | 4.862909  |
| O  | 4.225313 | 4.171912 | 6.807911  |
| O  | 6.982174 | 4.505156 | 8.460602  |
| Si | 3.524733 | 5.205645 | 7.882408  |
| Si | 6.173230 | 5.531016 | 9.477588  |
| O  | 4.677818 | 5.880038 | 8.864215  |
| O  | 6.040936 | 4.841866 | 10.975138 |
| Si | 2.321275 | 3.593010 | 10.252086 |
| Si | 4.990140 | 3.892880 | 11.834233 |
| O  | 3.451163 | 4.191526 | 11.305251 |
| O  | 2.581262 | 1.974609 | 10.038623 |

|    |           |           |           |
|----|-----------|-----------|-----------|
| O  | 5.371881  | 2.293623  | 11.665981 |
| O  | 2.405742  | 4.425139  | 8.824544  |
| Si | 6.049317  | 1.271692  | 10.557170 |
| Si | 3.384991  | 0.978376  | 8.988675  |
| O  | 4.887953  | 0.613224  | 9.583730  |
| O  | 3.512257  | 1.682366  | 7.511392  |
| O  | 7.163756  | 2.071633  | 9.635783  |
| O  | 6.138129  | 2.269966  | 7.135875  |
| O  | 8.715851  | 2.669774  | 7.522768  |
| Si | 7.240232  | 2.893200  | 8.199217  |
| La | 6.642498  | 1.266839  | 4.308607  |
| O  | 7.978877  | -0.531350 | 5.589165  |
| C  | 7.427686  | -1.487812 | 6.135010  |
| C  | 8.202434  | -2.683953 | 6.609393  |
| C  | 8.134919  | -2.916658 | 8.130842  |
| C  | 6.837122  | -3.567133 | 8.606858  |
| C  | 5.574105  | -2.757616 | 8.315660  |
| C  | 5.310501  | -2.488131 | 6.845145  |
| O  | 6.114279  | -1.408150 | 6.294792  |
| Si | 4.562722  | 2.561387  | 6.560491  |
| O  | 4.609275  | 2.103943  | 5.031403  |
| O  | 6.798583  | 0.040489  | 11.340817 |
| Si | 7.280649  | -0.190889 | 12.945718 |
| O  | 2.565202  | -0.439728 | 8.858660  |
| Si | 0.968923  | -0.879890 | 9.203996  |
| O  | 2.764339  | 6.414318  | 7.080926  |
| Si | 2.442015  | 6.702162  | 5.444074  |
| O  | 0.805652  | 3.745041  | 10.874364 |
| O  | 5.130521  | 4.198623  | 13.443654 |
| O  | 7.035863  | 6.912427  | 9.636730  |
| Si | 6.924045  | 8.468455  | 8.987671  |
| Si | 10.138256 | 3.590348  | 7.450894  |
| C  | 5.961059  | -0.469016 | 2.634434  |
| B  | 8.225867  | 2.974575  | 3.007572  |
| H  | 4.962915  | 5.109152  | 13.703414 |
| H  | 8.101554  | 0.960941  | 13.416778 |
| H  | 6.085806  | -0.365517 | 13.819883 |
| H  | 6.709646  | 8.405955  | 7.513183  |
| H  | 0.375180  | 4.579373  | 10.665742 |
| H  | 1.624764  | 7.947837  | 5.405461  |
| H  | 3.715844  | 6.899270  | 4.695738  |
| H  | 5.799200  | 9.204728  | 9.634571  |
| H  | 8.217197  | 9.141339  | 9.293704  |
| H  | 0.768903  | -0.960880 | 10.679271 |
| H  | 0.013095  | 0.095235  | 8.605952  |
| H  | 0.777643  | -2.226367 | 8.592088  |
| H  | 8.098994  | -1.437332 | 12.947440 |
| H  | 9.926623  | 4.793326  | 6.599942  |
| H  | 10.538307 | 4.000153  | 8.829665  |
| H  | 11.175350 | 2.700734  | 6.860895  |
| H  | 4.293583  | -2.125090 | 6.695997  |
| H  | 5.456763  | -3.378835 | 6.222972  |
| H  | 4.702287  | -3.306139 | 8.692134  |
| H  | 5.582186  | -1.801769 | 8.850696  |
| H  | 6.904711  | -3.741208 | 9.686399  |
| H  | 6.745137  | -4.559028 | 8.141329  |
| H  | 8.301657  | -1.967640 | 8.654817  |
| H  | 8.977215  | -3.564393 | 8.396002  |
| H  | 9.231263  | -2.513336 | 6.288183  |
| H  | 7.835198  | -3.573407 | 6.079013  |
| H  | 5.360290  | -1.265291 | 3.104627  |
| H  | 6.807548  | -0.959755 | 2.130474  |
| H  | 5.332293  | -0.043409 | 1.837275  |



|   |          |          |          |
|---|----------|----------|----------|
| H | 8.866543 | 2.348931 | 3.871622 |
| H | 8.921917 | 3.753947 | 2.417123 |
| H | 7.724947 | 2.132496 | 2.242465 |
| H | 7.295063 | 3.557461 | 3.589736 |

TS<sub>G→H</sub>  
78

|    |           |           |           |
|----|-----------|-----------|-----------|
| H  | 1.207323  | 5.293277  | 4.786390  |
| O  | 3.755939  | 3.941684  | 6.715900  |
| O  | 6.906955  | 4.741851  | 8.508498  |
| Si | 3.169074  | 5.067001  | 7.772314  |
| Si | 5.878749  | 5.763656  | 9.333789  |
| O  | 4.398095  | 5.780710  | 8.615934  |
| O  | 5.748627  | 5.260505  | 10.901142 |
| Si | 2.122024  | 3.663333  | 10.339054 |
| Si | 4.767537  | 4.318353  | 11.848991 |
| O  | 3.212430  | 4.455141  | 11.303075 |
| O  | 2.515493  | 2.061133  | 10.266745 |
| O  | 5.263681  | 2.743132  | 11.824227 |
| O  | 2.116304  | 4.365663  | 8.841258  |
| Si | 6.013491  | 1.641230  | 10.846623 |
| Si | 3.366000  | 0.996973  | 9.326403  |
| O  | 4.916586  | 0.863959  | 9.892636  |
| O  | 3.384346  | 1.485229  | 7.751386  |
| O  | 7.124026  | 2.412539  | 9.873348  |
| O  | 5.893682  | 2.442236  | 7.443560  |
| O  | 8.409638  | 2.726814  | 7.477730  |
| Si | 7.071324  | 3.107957  | 8.380985  |
| La | 7.021109  | 1.470668  | 5.187271  |
| O  | 8.520305  | -0.227178 | 6.109429  |
| C  | 7.661989  | -1.125762 | 5.875541  |
| C  | 8.072088  | -2.553053 | 5.607875  |
| C  | 8.061217  | -3.405010 | 6.892308  |
| C  | 6.677780  | -3.959189 | 7.248267  |
| C  | 5.618178  | -2.910913 | 7.598131  |
| C  | 5.407050  | -1.832165 | 6.548275  |
| O  | 6.490052  | -0.880502 | 6.562684  |
| Si | 4.337609  | 2.385135  | 6.728069  |
| O  | 4.681021  | 1.756483  | 5.302884  |
| O  | 6.808450  | 0.547315  | 11.764457 |
| Si | 7.178086  | 0.420203  | 13.410470 |
| O  | 2.660041  | -0.479719 | 9.410193  |
| Si | 1.253328  | -1.068924 | 10.140007 |
| O  | 2.365896  | 6.222037  | 6.936853  |
| Si | 2.010494  | 6.441585  | 5.296160  |
| O  | 0.608792  | 3.740661  | 10.978939 |
| O  | 4.887524  | 4.785426  | 13.420469 |
| O  | 6.524662  | 7.264069  | 9.337650  |
| Si | 7.402301  | 8.202330  | 8.236535  |
| Si | 10.081053 | 2.634386  | 7.849881  |
| C  | 6.957147  | -0.739140 | 3.713451  |
| B  | 8.131147  | 3.269963  | 3.537825  |
| H  | 4.663642  | 5.704812  | 13.592044 |
| H  | 7.899971  | 1.640388  | 13.872367 |
| H  | 5.928266  | 0.232626  | 14.201318 |
| H  | 6.876136  | 8.007035  | 6.855002  |
| H  | 0.124064  | 4.542036  | 10.760419 |
| H  | 1.213831  | 7.698413  | 5.218790  |
| H  | 3.269616  | 6.579527  | 4.510571  |
| H  | 7.230634  | 9.618914  | 8.662963  |
| H  | 8.841598  | 7.817733  | 8.296413  |
| H  | 1.337119  | -0.914102 | 11.620838 |

|   |           |           |           |
|---|-----------|-----------|-----------|
| H | 0.055881  | -0.351778 | 9.615890  |
| H | 1.182463  | -2.513889 | 9.781384  |
| H | 8.054307  | -0.777431 | 13.541532 |
| H | 10.770494 | 2.405677  | 6.555607  |
| H | 10.496163 | 3.927763  | 8.463728  |
| H | 10.310257 | 1.513757  | 8.801252  |
| H | 4.521033  | -1.237289 | 6.775273  |
| H | 5.291856  | -2.241216 | 5.538644  |
| H | 4.655129  | -3.412375 | 7.755237  |
| H | 5.864559  | -2.413400 | 8.543915  |
| H | 6.777471  | -4.651337 | 8.092868  |
| H | 6.318767  | -4.562765 | 6.402221  |
| H | 8.475394  | -2.827730 | 7.727989  |
| H | 8.742794  | -4.248428 | 6.734226  |
| H | 9.078677  | -2.492166 | 5.188705  |
| H | 7.431796  | -3.019238 | 4.854438  |
| H | 6.254260  | -1.575876 | 3.684329  |
| H | 7.899500  | -1.052899 | 3.251824  |
| H | 6.516831  | 0.006032  | 3.018480  |
| H | 9.009256  | 2.629785  | 4.137194  |
| H | 8.606325  | 4.074775  | 2.785675  |
| H | 7.417929  | 2.447851  | 2.934204  |
| H | 7.409349  | 3.813440  | 4.392054  |

**H**  
78

|    |          |           |           |
|----|----------|-----------|-----------|
| H  | 1.457075 | 5.929261  | 4.878029  |
| O  | 3.713262 | 4.131965  | 6.841759  |
| O  | 6.847825 | 4.358423  | 8.677423  |
| Si | 3.254064 | 5.290730  | 7.926361  |
| Si | 5.992898 | 5.499876  | 9.550496  |
| O  | 4.553855 | 5.804454  | 8.812546  |
| O  | 5.762307 | 4.943124  | 11.085175 |
| Si | 1.960437 | 3.944591  | 10.414289 |
| Si | 4.631063 | 4.125794  | 11.982625 |
| O  | 3.126074 | 4.537008  | 11.435685 |
| O  | 2.139331 | 2.312057  | 10.282942 |
| O  | 4.882751 | 2.497259  | 11.874770 |
| O  | 2.093542 | 4.705017  | 8.949049  |
| Si | 5.482555 | 1.333529  | 10.869476 |
| Si | 2.798702 | 1.161341  | 9.295675  |
| O  | 4.305479 | 0.764213  | 9.862502  |
| O  | 2.890197 | 1.728282  | 7.742813  |
| O  | 6.722685 | 1.955480  | 9.942500  |
| O  | 5.523801 | 2.238413  | 7.539712  |
| O  | 8.058391 | 2.209936  | 7.558438  |
| Si | 6.775938 | 2.725492  | 8.489851  |
| La | 6.545120 | 1.250186  | 5.259425  |
| O  | 6.580655 | -0.762861 | 4.243126  |
| C  | 6.498429 | -1.765027 | 5.159931  |
| C  | 7.664238 | -2.759651 | 5.038380  |
| C  | 9.026761 | -2.255079 | 5.520496  |
| C  | 9.272619 | -2.477083 | 7.018023  |
| C  | 8.400454 | -1.647295 | 7.962354  |
| C  | 6.906023 | -1.702102 | 7.674997  |
| O  | 6.579327 | -1.016914 | 6.464142  |
| Si | 4.004657 | 2.498033  | 6.781125  |
| O  | 4.284722 | 1.896491  | 5.329491  |
| O  | 6.105400 | 0.104475  | 11.748077 |
| Si | 6.033167 | -0.343800 | 13.379603 |
| O  | 1.880113 | -0.190911 | 9.334546  |
| Si | 0.564481 | -0.756885 | 8.435260  |
| O  | 2.637658 | 6.572442  | 7.117976  |

|    |           |           |           |
|----|-----------|-----------|-----------|
| Si | 2.403064  | 6.914340  | 5.476116  |
| O  | 0.459026  | 4.221191  | 11.024698 |
| O  | 4.800265  | 4.486688  | 13.576575 |
| O  | 6.885907  | 6.863934  | 9.640063  |
| Si | 7.736107  | 7.841422  | 8.552515  |
| Si | 9.697937  | 2.740673  | 7.554589  |
| C  | 5.145415  | -2.468272 | 5.116554  |
| B  | 8.181548  | 2.930107  | 3.923264  |
| H  | 4.605825  | 5.397684  | 13.815406 |
| H  | 6.827957  | 0.612120  | 14.201944 |
| H  | 4.617054  | -0.371409 | 13.844532 |
| H  | 7.116629  | 7.770334  | 7.198031  |
| H  | 0.081428  | 5.072368  | 10.784285 |
| H  | 1.818510  | 8.283816  | 5.426593  |
| H  | 3.706472  | 6.882137  | 4.753632  |
| H  | 7.671879  | 9.230974  | 9.083937  |
| H  | 9.152150  | 7.378273  | 8.492816  |
| H  | -0.132094 | -1.756050 | 9.292762  |
| H  | -0.357075 | 0.366122  | 8.097000  |
| H  | 1.057215  | -1.406775 | 7.187088  |
| H  | 6.628926  | -1.707110 | 13.454448 |
| H  | 10.473597 | 1.637955  | 6.930410  |
| H  | 9.806887  | 4.005375  | 6.786507  |
| H  | 10.108575 | 2.936049  | 8.974796  |
| H  | 6.343413  | -1.206087 | 8.472094  |
| H  | 6.544200  | -2.736238 | 7.617324  |
| H  | 8.562860  | -1.977988 | 8.996553  |
| H  | 8.705244  | -0.593334 | 7.928984  |
| H  | 10.325434 | -2.271499 | 7.247709  |
| H  | 9.120113  | -3.543942 | 7.235601  |
| H  | 9.144385  | -1.195257 | 5.255950  |
| H  | 9.810666  | -2.784038 | 4.966286  |
| H  | 7.705108  | -2.998566 | 3.970654  |
| H  | 7.418649  | -3.697048 | 5.554968  |
| H  | 5.022924  | -3.184585 | 5.935721  |
| H  | 5.054110  | -3.011039 | 4.171252  |
| H  | 4.344043  | -1.726655 | 5.165208  |
| H  | 8.821831  | 2.123611  | 4.626546  |
| H  | 8.922972  | 3.652113  | 3.315631  |
| H  | 7.471935  | 2.256472  | 3.158646  |
| H  | 7.429526  | 3.572756  | 4.671065  |

TS<sub>E→I</sub>

|    |           |          |           |
|----|-----------|----------|-----------|
| 78 |           |          |           |
| O  | -0.018612 | 1.902539 | 6.986684  |
| Si | 0.376474  | 2.560901 | 8.441592  |
| O  | -0.946087 | 3.310744 | 9.101211  |
| O  | 3.559998  | 2.321332 | 9.792115  |
| Si | 7.538992  | 3.920332 | 9.556803  |
| Si | 4.703123  | 3.011118 | 8.809622  |
| B  | -2.111073 | 6.626471 | 7.639204  |
| La | 0.152209  | 6.128926 | 8.995135  |
| O  | 1.399978  | 3.847674 | 8.298133  |
| Si | 2.554071  | 4.717327 | 7.375033  |
| O  | 4.042174  | 4.259168 | 7.953538  |
| O  | 1.025031  | 1.429791 | 9.448053  |
| Si | 2.578509  | 0.991513 | 9.860844  |
| O  | 2.562895  | 0.379899 | 11.377073 |
| Si | 2.956522  | 0.966025 | 12.912170 |
| Si | -2.585661 | 2.828301 | 9.235832  |
| O  | 5.315227  | 1.873232 | 7.774784  |
| Si | 5.075176  | 1.271555 | 6.256980  |
| O  | 6.567772  | 0.887341 | 5.681361  |

|    |           |           |           |
|----|-----------|-----------|-----------|
| O  | 5.899904  | 3.571953  | 9.775344  |
| Si | 0.688387  | 0.876837  | 5.882791  |
| O  | 1.436683  | -0.358504 | 6.691414  |
| Si | 2.930833  | -0.738429 | 7.282553  |
| O  | 3.006032  | -2.380232 | 7.251909  |
| O  | 0.569267  | 7.937630  | 10.318442 |
| C  | 1.300370  | 9.130660  | 10.414457 |
| C  | 2.807880  | 8.898081  | 10.320886 |
| C  | 3.468429  | 8.257770  | 11.545424 |
| C  | 2.905153  | 6.915444  | 12.035628 |
| C  | 1.569959  | 7.022689  | 12.786847 |
| C  | 0.313108  | 6.644814  | 12.040523 |
| O  | 0.265194  | 5.564866  | 11.390936 |
| C  | -0.966201 | 7.287833  | 12.505360 |
| O  | 2.083440  | 6.218198  | 7.655096  |
| O  | 2.416288  | 4.196599  | 5.805511  |
| Si | 2.866040  | 2.936217  | 4.836046  |
| O  | 1.777531  | 1.696488  | 4.961703  |
| O  | 3.114586  | -0.180349 | 8.832450  |
| O  | 4.116473  | -0.078991 | 6.335693  |
| O  | 4.367981  | 2.382177  | 5.255208  |
| O  | 2.928351  | 3.438686  | 3.281080  |
| Si | 2.347502  | 4.802432  | 2.463392  |
| O  | -0.502123 | 0.278962  | 4.938947  |
| Si | -0.957659 | -1.261875 | 4.411807  |
| H  | 3.781192  | -2.760363 | 7.675670  |
| H  | 6.610715  | 0.771129  | 4.727510  |
| H  | 2.535215  | 4.519856  | 1.012612  |
| H  | 0.903060  | 5.012195  | 2.766959  |
| H  | 3.136913  | 6.004153  | 2.858078  |
| H  | -2.029920 | -1.052009 | 3.399955  |
| H  | 0.205952  | -1.961396 | 3.794716  |
| H  | -1.480635 | -2.055952 | 5.560532  |
| H  | 8.343095  | 2.684648  | 9.780253  |
| H  | 7.784850  | 4.449161  | 8.184018  |
| H  | 7.892281  | 4.948953  | 10.575580 |
| H  | 2.421929  | -0.025969 | 13.886177 |
| H  | 4.437581  | 1.073393  | 13.049211 |
| H  | 2.326019  | 2.299222  | 13.135729 |
| H  | -3.157718 | 3.635424  | 10.345259 |
| H  | -3.283605 | 3.090587  | 7.951060  |
| H  | -2.617660 | 1.375336  | 9.570796  |
| H  | 0.991084  | 9.814502  | 9.608354  |
| H  | 1.056544  | 9.648060  | 11.359879 |
| H  | 3.297963  | 9.863981  | 10.136262 |
| H  | 2.996023  | 8.281622  | 9.431863  |
| H  | 4.531545  | 8.113539  | 11.315185 |
| H  | 3.441007  | 8.968619  | 12.384490 |
| H  | 2.809262  | 6.204778  | 11.206390 |
| H  | 3.643452  | 6.472737  | 12.713600 |
| H  | 1.567698  | 6.324273  | 13.638133 |
| H  | 1.449122  | 8.019691  | 13.222724 |
| H  | -0.867887 | 8.371550  | 12.583169 |
| H  | -1.197636 | 6.892235  | 13.503734 |
| H  | -1.794120 | 7.036028  | 11.840500 |
| H  | -1.415244 | 7.645175  | 7.782018  |
| H  | -1.423317 | 5.782861  | 7.043409  |
| H  | -2.352614 | 6.182279  | 8.777936  |
| H  | -3.125538 | 6.867375  | 7.045503  |

**I**

78

|   |           |          |          |
|---|-----------|----------|----------|
| O | -0.034921 | 2.049372 | 6.909367 |
|---|-----------|----------|----------|

|    |           |           |           |
|----|-----------|-----------|-----------|
| Si | 0.196076  | 2.832062  | 8.345358  |
| O  | -1.226767 | 3.429367  | 8.897846  |
| O  | 3.381931  | 2.657192  | 9.883897  |
| Si | 7.369618  | 4.085327  | 9.641217  |
| Si | 4.534084  | 3.230712  | 8.842367  |
| B  | -2.108347 | 7.084226  | 7.595750  |
| La | 0.353471  | 6.782317  | 8.638573  |
| O  | 1.175522  | 4.156218  | 8.149806  |
| Si | 2.410797  | 4.770543  | 7.135002  |
| O  | 3.866091  | 4.310559  | 7.797153  |
| O  | 0.854614  | 1.795411  | 9.451414  |
| Si | 2.349548  | 1.377887  | 10.024756 |
| O  | 2.210754  | 1.005140  | 11.616113 |
| Si | 2.255664  | -0.438115 | 12.492362 |
| Si | -2.859057 | 3.058102  | 8.601243  |
| O  | 5.213098  | 1.977151  | 7.996261  |
| Si | 5.005569  | 1.232639  | 6.536447  |
| O  | 6.499102  | 0.776757  | 6.015658  |
| O  | 5.688680  | 3.961244  | 9.747035  |
| Si | 0.644712  | 0.824946  | 6.025707  |
| O  | 1.333571  | -0.287706 | 7.042986  |
| Si | 2.805222  | -0.637332 | 7.701256  |
| O  | 2.873891  | -2.276456 | 7.828793  |
| O  | 0.978601  | 8.639024  | 9.574110  |
| C  | 1.389432  | 9.896276  | 10.018202 |
| C  | 2.808346  | 9.902870  | 10.593765 |
| C  | 3.018753  | 9.261063  | 11.972095 |
| C  | 2.731670  | 7.753427  | 12.070174 |
| C  | 1.250306  | 7.443385  | 12.400929 |
| C  | 0.932236  | 6.009694  | 12.091252 |
| O  | 0.572584  | 5.672029  | 10.958155 |
| C  | 1.085570  | 4.976886  | 13.165101 |
| O  | 2.113125  | 6.339534  | 7.167283  |
| O  | 2.271649  | 4.019501  | 5.660001  |
| Si | 2.840555  | 2.700758  | 4.845144  |
| O  | 1.790576  | 1.430884  | 5.005200  |
| O  | 2.927577  | 0.061920  | 9.202216  |
| O  | 4.045516  | -0.104519 | 6.744645  |
| O  | 4.327306  | 2.241909  | 5.416260  |
| O  | 3.005984  | 3.060912  | 3.257171  |
| Si | 2.522043  | 4.368590  | 2.298027  |
| O  | -0.546094 | 0.111623  | 5.162624  |
| Si | -0.937829 | -1.478053 | 4.745411  |
| H  | 3.761880  | -2.632615 | 7.926732  |
| H  | 6.595409  | 0.772478  | 5.058614  |
| H  | 2.835284  | 3.981657  | 0.893477  |
| H  | 1.059138  | 4.611420  | 2.451844  |
| H  | 3.289591  | 5.589702  | 2.676027  |
| H  | -1.972646 | -1.386222 | 3.678104  |
| H  | 0.267441  | -2.193303 | 4.234277  |
| H  | -1.487004 | -2.192137 | 5.933821  |
| H  | 8.001251  | 2.808676  | 10.083683 |
| H  | 7.787046  | 4.403525  | 8.245135  |
| H  | 7.763574  | 5.191742  | 10.558937 |
| H  | 1.265668  | -1.411840 | 11.948185 |
| H  | 3.626017  | -1.025864 | 12.446528 |
| H  | 1.903228  | -0.079036 | 13.895288 |
| H  | -3.644588 | 3.849563  | 9.585718  |
| H  | -3.223709 | 3.419041  | 7.205538  |
| H  | -3.074578 | 1.598032  | 8.830200  |
| H  | 1.355949  | 10.614045 | 9.183723  |
| H  | 0.687912  | 10.281282 | 10.780775 |
| H  | 3.134266  | 10.949827 | 10.663900 |

|   |           |          |           |
|---|-----------|----------|-----------|
| H | 3.470900  | 9.422047 | 9.861619  |
| H | 4.066087  | 9.423676 | 12.255234 |
| H | 2.421928  | 9.795153 | 12.725085 |
| H | 3.007696  | 7.274818 | 11.123759 |
| H | 3.364540  | 7.303466 | 12.844459 |
| H | 1.060171  | 7.659000 | 13.457887 |
| H | 0.613010  | 8.070746 | 11.773325 |
| H | 0.274090  | 5.105872 | 13.892698 |
| H | 2.022334  | 5.130620 | 13.710735 |
| H | 1.045019  | 3.969392 | 12.750632 |
| H | -1.412451 | 8.109872 | 7.498054  |
| H | -1.508324 | 6.161542 | 7.023212  |
| H | -2.178300 | 6.801210 | 8.805074  |
| H | -3.196715 | 7.259025 | 7.120004  |

#### 4.3 Catalysts of (alkyl or dialkylamido)La@ac-1

##### (NMe<sub>2</sub>)La@ac-1

|    |           |           |           |
|----|-----------|-----------|-----------|
| 60 |           |           |           |
| O  | 2.230794  | 2.282146  | 10.535744 |
| O  | -0.073141 | -1.936830 | 9.966397  |
| O  | 1.419361  | -0.149102 | 11.265147 |
| Si | 0.626845  | -1.588867 | 11.409008 |
| O  | 1.653366  | -2.834759 | 11.798573 |
| Si | 2.652970  | -2.945929 | 13.127849 |
| O  | 3.941922  | -3.894019 | 12.933037 |
| La | 5.918117  | -2.921565 | 13.602766 |
| Si | 0.148626  | -3.166742 | 8.833120  |
| O  | -0.575927 | -1.495244 | 12.541648 |
| Si | -1.038071 | -0.932125 | 14.023301 |
| O  | -0.179034 | -1.591281 | 15.268906 |
| Si | 1.187848  | -2.406437 | 15.705974 |
| O  | 0.858628  | -3.372613 | 16.992848 |
| Si | -0.566785 | -3.974588 | 17.670505 |
| Si | 2.158961  | 1.228418  | 11.791539 |
| O  | 3.709364  | 0.948627  | 12.316210 |
| Si | 4.205217  | -0.103683 | 13.509440 |
| O  | 3.120944  | -1.375899 | 13.463243 |
| Si | 3.507219  | 3.063069  | 9.755478  |
| O  | 1.293018  | 1.942340  | 13.007720 |
| Si | 0.411513  | 1.725037  | 14.386676 |
| O  | -0.135740 | 3.185503  | 14.913741 |
| O  | -2.609383 | -1.346905 | 14.286402 |
| O  | -0.858485 | 0.713541  | 14.059187 |
| O  | 1.298250  | 1.103319  | 15.632026 |
| Si | 2.669344  | 0.296561  | 16.071897 |
| O  | 3.145420  | 0.803227  | 17.560081 |
| Si | 2.816931  | 2.169124  | 18.497463 |
| O  | 2.371504  | -1.341668 | 16.213310 |
| O  | 1.745977  | -3.358913 | 14.477361 |
| O  | 3.907971  | 0.575387  | 15.014980 |
| O  | 5.717051  | -0.641097 | 13.355913 |
| N  | 5.207403  | -2.896017 | 16.209905 |
| N  | 7.935297  | -4.017018 | 13.387771 |
| H  | -3.178773 | -1.252173 | 13.517159 |
| H  | -0.239448 | -4.485865 | 9.411977  |
| H  | -0.741173 | -2.836061 | 7.683796  |
| H  | -0.144672 | -4.976149 | 18.691359 |
| H  | -0.502716 | 3.745904  | 14.223689 |
| H  | 1.413927  | 2.122213  | 19.000304 |
| H  | 3.768967  | 2.119032  | 19.644100 |
| H  | 3.036493  | 3.414501  | 17.706788 |
| H  | -1.330380 | -2.873505 | 18.324793 |

|   |           |           |           |
|---|-----------|-----------|-----------|
| H | -1.407447 | -4.632014 | 16.628677 |
| H | 2.891172  | 3.879839  | 8.671302  |
| H | 4.238294  | 3.950872  | 10.706013 |
| H | 4.449085  | 2.066358  | 9.167339  |
| H | 1.569295  | -3.211726 | 8.378478  |
| H | 4.312668  | -2.401024 | 16.274705 |
| H | 5.050318  | -3.813105 | 16.622858 |
| H | 5.844746  | -2.407115 | 16.835104 |
| C | 8.039436  | -5.437086 | 13.126505 |
| C | 9.233359  | -3.377361 | 13.386228 |
| H | 8.631116  | -5.967130 | 13.893871 |
| H | 7.044045  | -5.907816 | 13.111399 |
| H | 8.510176  | -5.659037 | 12.152206 |
| H | 9.903375  | -3.777028 | 14.168070 |
| H | 9.764172  | -3.491796 | 12.424300 |
| H | 9.137511  | -2.296542 | 13.570405 |

## D

78

|    |           |           |           |
|----|-----------|-----------|-----------|
| Si | -4.805620 | 10.765943 | 13.289531 |
| O  | -4.280563 | 9.830231  | 14.578580 |
| Si | -2.817942 | 9.150878  | 14.937785 |
| O  | -1.876596 | 9.286793  | 13.575792 |
| O  | 2.192963  | 8.262291  | 15.789494 |
| Si | 1.816925  | 6.924732  | 16.692165 |
| O  | 3.215993  | 6.375990  | 17.363866 |
| O  | 1.176004  | 5.685615  | 15.793364 |
| Si | -0.138591 | 5.813803  | 14.762616 |
| O  | -1.538766 | 5.344686  | 15.567236 |
| Si | -2.596736 | 6.351962  | 16.344867 |
| O  | 0.797953  | 7.325038  | 17.930810 |
| O  | -3.129409 | 7.584155  | 15.369279 |
| O  | -1.936400 | 6.929454  | 17.748348 |
| Si | -0.696613 | 7.681632  | 18.528988 |
| O  | -0.909859 | 9.324374  | 18.456145 |
| H  | -6.193857 | 11.204816 | 13.613282 |
| Si | -0.890719 | 10.381138 | 17.178941 |
| O  | 0.566424  | 10.353148 | 16.425417 |
| O  | -2.159112 | 10.003872 | 16.186323 |
| Si | 1.591467  | 9.721085  | 15.293343 |
| O  | 0.832330  | 9.659695  | 13.815049 |
| O  | 2.880449  | 10.732914 | 15.142687 |
| Si | 3.271330  | 11.945079 | 14.045426 |
| Si | -0.364845 | 8.569359  | 13.387671 |
| O  | -0.173975 | 7.949582  | 11.917231 |
| O  | -3.923981 | 5.459634  | 16.737242 |
| Si | -4.566745 | 4.935067  | 18.202496 |
| O  | -0.795170 | 7.178014  | 20.096064 |
| O  | -0.337701 | 7.474728  | 14.648373 |
| La | -0.133201 | 5.768865  | 11.144500 |
| N  | -2.000349 | 3.849518  | 11.712843 |
| O  | 0.033597  | 5.042131  | 13.369246 |
| O  | -1.073521 | 11.920409 | 17.741358 |
| Si | 4.123151  | 4.978194  | 17.123998 |
| N  | 1.820673  | 5.145187  | 10.099916 |
| C  | 1.990972  | 3.746932  | 9.783604  |
| O  | -0.975269 | 7.591674  | 9.120714  |
| C  | -1.723733 | 6.721949  | 8.436019  |
| O  | -1.786489 | 5.594596  | 8.913233  |
| C  | 3.025159  | 5.902690  | 9.853999  |
| C  | -0.820882 | 9.000809  | 8.806268  |
| C  | -2.122685 | 9.777797  | 8.868795  |
| C  | -3.044044 | 9.605922  | 7.659944  |

|   |           |           |           |
|---|-----------|-----------|-----------|
| C | -3.547434 | 8.181382  | 7.427224  |
| C | -2.433781 | 7.144136  | 7.183286  |
| H | -1.895996 | 12.064680 | 18.218536 |
| H | -0.000599 | 7.355367  | 20.608348 |
| H | -5.005556 | 6.093873  | 19.033922 |
| H | -5.749180 | 4.092302  | 17.857207 |
| H | -3.573543 | 4.117459  | 18.958588 |
| H | -4.831802 | 9.963829  | 12.026121 |
| H | -3.935344 | 11.962243 | 13.086558 |
| H | 5.365081  | 5.142212  | 17.934127 |
| H | 3.375797  | 3.775169  | 17.596065 |
| H | 4.481143  | 4.812842  | 15.684316 |
| H | 2.130816  | 12.890047 | 13.853240 |
| H | 4.438239  | 12.677437 | 14.616226 |
| H | 3.651501  | 11.355644 | 12.726390 |
| H | -0.135592 | 9.331708  | 9.586685  |
| H | -0.328613 | 9.084619  | 7.830220  |
| H | -1.849188 | 10.835981 | 8.959262  |
| H | -2.636147 | 9.518899  | 9.802756  |
| H | -3.908936 | 10.268376 | 7.776778  |
| H | -2.517415 | 9.948345  | 6.757876  |
| H | -4.170403 | 7.853909  | 8.269112  |
| H | -4.197758 | 8.173446  | 6.546140  |
| H | -2.846069 | 6.230201  | 6.751706  |
| H | -1.697825 | 7.546588  | 6.474449  |
| H | 3.327140  | 5.886621  | 8.790054  |
| H | 2.885632  | 6.955816  | 10.132785 |
| H | 3.888811  | 5.528284  | 10.432988 |
| H | 2.202940  | 3.567844  | 8.713186  |
| H | 2.806968  | 3.270392  | 10.357014 |
| H | 1.074180  | 3.175383  | 10.013874 |
| H | -1.937673 | 2.926376  | 11.293130 |
| H | -1.701842 | 3.774577  | 12.686859 |
| H | -2.983910 | 4.105057  | 11.709722 |

TS<sub>D→E</sub>

78

|    |           |           |           |
|----|-----------|-----------|-----------|
| Si | -4.850927 | 11.114971 | 14.477206 |
| O  | -4.297517 | 9.781668  | 15.345129 |
| Si | -2.795793 | 9.143937  | 15.575352 |
| O  | -1.849848 | 9.624671  | 14.302196 |
| O  | 2.213378  | 8.408522  | 16.256383 |
| Si | 1.984170  | 6.884949  | 16.853159 |
| O  | 3.442637  | 6.336194  | 17.375929 |
| O  | 1.421010  | 5.810227  | 15.718172 |
| Si | 0.044377  | 6.004603  | 14.792553 |
| O  | -1.286669 | 5.360766  | 15.597433 |
| Si | -2.400471 | 6.200331  | 16.487744 |
| O  | 0.959127  | 6.895734  | 18.152162 |
| O  | -3.009014 | 7.492133  | 15.624661 |
| O  | -1.790585 | 6.681562  | 17.944601 |
| Si | -0.507854 | 7.232794  | 18.823656 |
| O  | -0.641903 | 8.872592  | 19.017717 |
| H  | -6.247879 | 11.366542 | 14.934523 |
| Si | -0.876400 | 10.098799 | 17.926021 |
| O  | 0.473508  | 10.365088 | 17.033720 |
| O  | -2.193956 | 9.691354  | 17.008905 |
| Si | 1.579313  | 9.892544  | 15.899082 |
| O  | 0.874264  | 9.961182  | 14.393558 |
| O  | 2.829798  | 10.956804 | 15.913592 |
| Si | 3.243557  | 12.275507 | 14.951661 |
| Si | -0.362336 | 8.969239  | 13.869542 |
| O  | -0.304601 | 8.602753  | 12.303092 |



|    |           |           |           |
|----|-----------|-----------|-----------|
| O  | -3.667722 | 5.184393  | 16.753328 |
| Si | -4.384308 | 4.560659  | 18.147191 |
| O  | -0.618473 | 6.483682  | 20.287432 |
| O  | -0.259149 | 7.647795  | 14.890302 |
| La | -0.617986 | 6.513461  | 11.415217 |
| N  | -2.968748 | 5.837996  | 12.625617 |
| O  | 0.165779  | 5.442875  | 13.291489 |
| O  | -1.159153 | 11.506376 | 18.733834 |
| Si | 4.378365  | 4.995794  | 16.967180 |
| N  | 0.676006  | 5.899145  | 9.437874  |
| C  | 0.845317  | 4.505158  | 9.087357  |
| O  | -1.423361 | 7.762656  | 8.985525  |
| C  | -1.466681 | 6.440343  | 8.623693  |
| O  | -2.090157 | 5.728047  | 9.435587  |
| C  | 1.790329  | 6.687211  | 8.961474  |
| C  | -0.915412 | 8.781618  | 8.098355  |
| C  | -1.913714 | 9.133469  | 7.004764  |
| C  | -1.976434 | 8.134919  | 5.847285  |
| C  | -2.300991 | 6.694253  | 6.246965  |
| C  | -1.255729 | 6.059340  | 7.186223  |
| H  | -1.904583 | 11.468241 | 19.340312 |
| H  | 0.189991  | 6.523932  | 20.807069 |
| H  | -4.893502 | 5.662405  | 19.014819 |
| H  | -5.524428 | 3.719086  | 17.681081 |
| H  | -3.413762 | 3.721160  | 18.907156 |
| H  | -4.854072 | 10.812192 | 13.014260 |
| H  | -4.007288 | 12.317999 | 14.737390 |
| H  | 5.616888  | 5.085922  | 17.792967 |
| H  | 3.654272  | 3.729810  | 17.285099 |
| H  | 4.735475  | 5.020809  | 15.518371 |
| H  | 2.084483  | 13.200862 | 14.783003 |
| H  | 4.353252  | 12.979422 | 15.656011 |
| H  | 3.713843  | 11.814215 | 13.611800 |
| H  | -0.744910 | 9.635044  | 8.757771  |
| H  | 0.049910  | 8.467418  | 7.688943  |
| H  | -1.635826 | 10.119142 | 6.611157  |
| H  | -2.900187 | 9.253059  | 7.470216  |
| H  | -2.721353 | 8.481626  | 5.121450  |
| H  | -1.011760 | 8.142619  | 5.320265  |
| H  | -3.295150 | 6.635938  | 6.707528  |
| H  | -2.348639 | 6.082162  | 5.339508  |
| H  | -1.326284 | 4.970832  | 7.157618  |
| H  | -0.246121 | 6.331406  | 6.860002  |
| H  | 1.880201  | 6.682426  | 7.855930  |
| H  | 1.698287  | 7.735951  | 9.276103  |
| H  | 2.761828  | 6.325806  | 9.343340  |
| H  | 0.973510  | 4.350299  | 7.999097  |
| H  | 1.727068  | 4.048829  | 9.570208  |
| H  | -0.034473 | 3.922137  | 9.391947  |
| H  | -3.773403 | 5.727808  | 12.014119 |
| H  | -2.830787 | 4.952731  | 13.109510 |
| H  | -3.228299 | 6.501362  | 13.356271 |

## E

78

|    |           |           |           |
|----|-----------|-----------|-----------|
| Si | -5.090289 | 11.199200 | 14.882775 |
| O  | -4.460374 | 9.769469  | 15.515010 |
| Si | -2.927618 | 9.185416  | 15.661317 |
| O  | -2.043166 | 9.763052  | 14.385694 |
| O  | 2.107908  | 8.583566  | 16.129817 |
| Si | 1.961213  | 7.021070  | 16.645920 |
| O  | 3.454709  | 6.502102  | 17.094549 |
| O  | 1.404429  | 5.994876  | 15.463973 |

|    |           |           |           |
|----|-----------|-----------|-----------|
| Si | -0.022402 | 6.168017  | 14.612360 |
| O  | -1.286904 | 5.456434  | 15.462159 |
| Si | -2.407112 | 6.217276  | 16.411286 |
| O  | 0.980066  | 6.911904  | 17.973673 |
| O  | -3.076053 | 7.524446  | 15.615377 |
| O  | -1.771517 | 6.662383  | 17.868620 |
| Si | -0.462307 | 7.192829  | 18.720526 |
| O  | -0.617895 | 8.818819  | 18.996046 |
| H  | -6.455162 | 11.355386 | 15.462389 |
| Si | -0.954034 | 10.086953 | 17.981672 |
| O  | 0.336251  | 10.451752 | 17.038040 |
| O  | -2.297337 | 9.672481  | 17.104135 |
| Si | 1.423798  | 10.062581 | 15.855173 |
| O  | 0.672240  | 10.172371 | 14.375661 |
| O  | 2.644815  | 11.159459 | 15.881499 |
| Si | 2.954309  | 12.573026 | 15.018576 |
| Si | -0.560714 | 9.181084  | 13.843012 |
| O  | -0.567473 | 8.917432  | 12.255515 |
| O  | -3.642081 | 5.161839  | 16.668291 |
| Si | -4.135436 | 4.251663  | 18.000563 |
| O  | -0.496898 | 6.373900  | 20.150059 |
| O  | -0.378237 | 7.796016  | 14.764536 |
| La | -0.786672 | 6.837396  | 11.299585 |
| N  | -3.195770 | 6.459022  | 12.466898 |
| O  | 0.048700  | 5.651539  | 13.090413 |
| O  | -1.250875 | 11.439073 | 18.874032 |
| Si | 4.493041  | 5.319154  | 16.494329 |
| N  | 0.372358  | 5.412963  | 9.253491  |
| C  | -0.046750 | 4.009977  | 9.298082  |
| O  | -0.019044 | 7.622659  | 8.933180  |
| C  | -0.638647 | 6.303461  | 8.557215  |
| O  | -1.796682 | 6.181072  | 9.203925  |
| C  | 1.755116  | 5.514520  | 8.785295  |
| C  | -0.191757 | 8.795522  | 8.134633  |
| C  | -1.583515 | 9.035157  | 7.553043  |
| C  | -1.867402 | 8.274592  | 6.255772  |
| C  | -1.945174 | 6.755447  | 6.400468  |
| C  | -0.713757 | 6.111563  | 7.039322  |
| H  | -1.941414 | 11.331076 | 19.534669 |
| H  | 0.338204  | 6.387717  | 20.627210 |
| H  | -4.664777 | 5.143824  | 19.072315 |
| H  | -5.221525 | 3.355904  | 17.507734 |
| H  | -3.005296 | 3.434554  | 18.529695 |
| H  | -5.189300 | 11.096410 | 13.395945 |
| H  | -4.242421 | 12.370588 | 15.250071 |
| H  | 5.751941  | 5.427858  | 17.285961 |
| H  | 3.902276  | 3.960213  | 16.673017 |
| H  | 4.785052  | 5.553139  | 15.049089 |
| H  | 1.744510  | 13.445659 | 14.968748 |
| H  | 4.055327  | 13.274218 | 15.738860 |
| H  | 3.392670  | 12.244322 | 13.629914 |
| H  | 0.076956  | 9.614663  | 8.809177  |
| H  | 0.550693  | 8.785625  | 7.322525  |
| H  | -1.656046 | 10.111288 | 7.348912  |
| H  | -2.342340 | 8.807656  | 8.310745  |
| H  | -2.809041 | 8.638821  | 5.826810  |
| H  | -1.084038 | 8.531070  | 5.527215  |
| H  | -2.814094 | 6.482432  | 7.008454  |
| H  | -2.097141 | 6.316058  | 5.407126  |
| H  | -0.761396 | 5.029299  | 6.870540  |
| H  | 0.211949  | 6.461258  | 6.565257  |
| H  | 1.893912  | 5.057244  | 7.793525  |
| H  | 2.054068  | 6.561649  | 8.738433  |

|   |           |          |           |
|---|-----------|----------|-----------|
| H | 2.411201  | 4.991801 | 9.488815  |
| H | 0.113444  | 3.495216 | 8.337706  |
| H | 0.533228  | 3.483327 | 10.062528 |
| H | -1.108010 | 3.953706 | 9.545335  |
| H | -3.992015 | 6.834651 | 11.956740 |
| H | -3.386918 | 5.469298 | 12.610114 |
| H | -3.219041 | 6.879460 | 13.398831 |

TS<sub>E→F</sub>

78

|    |           |           |           |
|----|-----------|-----------|-----------|
| C  | 0.397878  | 5.550688  | 11.854353 |
| N  | -0.311833 | 5.497609  | 10.569585 |
| C  | -0.987946 | 6.760200  | 10.284573 |
| La | -1.460532 | 2.921680  | 10.079297 |
| N  | -0.244588 | 0.736029  | 11.137000 |
| O  | -1.037062 | 4.579835  | 8.414792  |
| C  | -1.090515 | 4.779406  | 7.022347  |
| C  | 0.061391  | 4.167412  | 6.221980  |
| C  | 1.356087  | 4.982810  | 6.199441  |
| C  | 2.105338  | 5.115600  | 7.526409  |
| C  | 1.333578  | 5.826081  | 8.640359  |
| C  | 0.489881  | 4.912406  | 9.502887  |
| O  | 0.910743  | 3.747477  | 9.792146  |
| O  | -2.997735 | 3.097265  | 11.777841 |
| Si | -4.010869 | 1.952600  | 12.280002 |
| O  | -4.151827 | 0.646443  | 11.241547 |
| Si | -3.641108 | 0.210750  | 9.708842  |
| O  | -2.631266 | 1.257686  | 9.022240  |
| O  | -5.071022 | -0.014175 | 8.875892  |
| Si | -6.561496 | -0.256252 | 9.570830  |
| O  | -6.992066 | 0.945564  | 10.621155 |
| Si | -6.929990 | 1.521957  | 12.169697 |
| O  | -8.257465 | 2.466697  | 12.373594 |
| Si | -8.548110 | 3.886174  | 13.232852 |
| O  | -2.896237 | -1.269722 | 9.996967  |
| Si | -2.957594 | -2.142553 | 11.401937 |
| O  | -1.802319 | -3.309604 | 11.302116 |
| Si | -1.858568 | -4.991337 | 11.178220 |
| O  | -7.675715 | -0.282360 | 8.362793  |
| Si | -7.599930 | 0.067045  | 6.716619  |
| O  | -6.591404 | -1.737783 | 10.304481 |
| Si | -6.068344 | -2.803901 | 11.447492 |
| O  | -6.530889 | -4.327206 | 11.022608 |
| O  | -4.427695 | -2.862724 | 11.609178 |
| O  | -2.550099 | -1.193892 | 12.712880 |
| Si | -3.342107 | -0.417100 | 13.957753 |
| O  | -2.397929 | -0.627994 | 15.291406 |
| Si | -2.010627 | 0.375392  | 16.587813 |
| O  | -6.739525 | -2.393348 | 12.905270 |
| Si | -6.441822 | -1.114653 | 13.919416 |
| O  | -7.285580 | -1.316834 | 15.319635 |
| O  | -4.814428 | -1.104878 | 14.232296 |
| O  | -6.981785 | 0.290761  | 13.271067 |
| O  | -3.469847 | 1.213679  | 13.691551 |
| O  | -5.589977 | 2.461388  | 12.468946 |
| H  | -7.056479 | 1.438684  | 6.489395  |
| H  | -3.222461 | 1.065100  | 17.118151 |
| H  | -1.421306 | -0.501359 | 17.640154 |
| H  | -7.093986 | -2.140266 | 15.778165 |
| H  | -7.420400 | -4.376873 | 10.659816 |
| H  | -0.999511 | 1.391700  | 16.166110 |
| H  | -0.442043 | -5.441013 | 11.050688 |
| H  | -2.468372 | -5.585761 | 12.402879 |

|   |            |           |           |
|---|------------|-----------|-----------|
| H | -2.631536  | -5.405473 | 9.971654  |
| H | -10.029193 | 4.023257  | 13.335760 |
| H | -7.949118  | 3.818827  | 14.598249 |
| H | -7.987089  | 5.058032  | 12.497241 |
| H | -6.751001  | -0.933461 | 6.005255  |
| H | -8.999628  | -0.010727 | 6.208340  |
| H | -2.035078  | 4.339524  | 6.668348  |
| H | -1.151048  | 5.858831  | 6.797010  |
| H | -0.285222  | 4.056004  | 5.185897  |
| H | 0.251802   | 3.151022  | 6.592106  |
| H | 2.039190   | 4.533479  | 5.467450  |
| H | 1.126657   | 5.988204  | 5.816057  |
| H | 2.407621   | 4.128346  | 7.893082  |
| H | 3.029390   | 5.674651  | 7.337749  |
| H | 2.047215   | 6.276883  | 9.346769  |
| H | 0.731519   | 6.651785  | 8.249042  |
| H | -0.293645  | 7.613489  | 10.253157 |
| H | -1.510812  | 6.676424  | 9.332161  |
| H | -1.722216  | 6.950705  | 11.073014 |
| H | 1.128832   | 6.373811  | 11.889099 |
| H | -0.329596  | 5.705171  | 12.656298 |
| H | 0.925649   | 4.612113  | 12.027184 |
| H | 0.675017   | 0.847557  | 11.556582 |
| H | -0.837623  | 0.279537  | 11.832150 |
| H | -0.146325  | 0.052950  | 10.387787 |

## F

|    |           |           |           |
|----|-----------|-----------|-----------|
| 78 |           |           |           |
| Si | -5.090289 | 11.199200 | 14.882775 |
| O  | -4.460374 | 9.769469  | 15.515010 |
| Si | -2.927618 | 9.185416  | 15.661317 |
| O  | -2.043166 | 9.763052  | 14.385694 |
| O  | 2.107908  | 8.583566  | 16.129817 |
| Si | 1.961213  | 7.021070  | 16.645920 |
| O  | 3.454709  | 6.502102  | 17.094549 |
| O  | 1.404429  | 5.994876  | 15.463973 |
| Si | -0.022402 | 6.168017  | 14.612360 |
| O  | -1.286904 | 5.456434  | 15.462159 |
| Si | -2.407112 | 6.217276  | 16.411286 |
| O  | 0.980066  | 6.911904  | 17.973673 |
| O  | -3.076053 | 7.524446  | 15.615377 |
| O  | -1.771517 | 6.662383  | 17.868620 |
| Si | -0.462307 | 7.192829  | 18.720526 |
| O  | -0.617895 | 8.818819  | 18.996046 |
| H  | -6.455162 | 11.355386 | 15.462389 |
| Si | -0.954034 | 10.086953 | 17.981672 |
| O  | 0.336251  | 10.451752 | 17.038040 |
| O  | -2.297337 | 9.672481  | 17.104135 |
| Si | 1.423798  | 10.062581 | 15.855173 |
| O  | 0.672240  | 10.172371 | 14.375661 |
| O  | 2.644815  | 11.159459 | 15.881499 |
| Si | 2.954309  | 12.573026 | 15.018576 |
| Si | -0.560714 | 9.181084  | 13.843012 |
| O  | -0.567473 | 8.917432  | 12.255515 |
| O  | -3.642081 | 5.161839  | 16.668291 |
| Si | -4.135436 | 4.251663  | 18.000563 |
| O  | -0.496898 | 6.373900  | 20.150059 |
| O  | -0.378237 | 7.796016  | 14.764536 |
| La | -0.786672 | 6.837396  | 11.299585 |
| N  | -3.195770 | 6.459022  | 12.466898 |
| O  | 0.048700  | 5.651539  | 13.090413 |
| O  | -1.250875 | 11.439073 | 18.874032 |
| Si | 4.493041  | 5.319154  | 16.494329 |

|   |           |           |           |
|---|-----------|-----------|-----------|
| N | 0.372358  | 5.412963  | 9.253491  |
| C | -0.046750 | 4.009977  | 9.298082  |
| O | -0.019044 | 7.622659  | 8.933180  |
| C | -0.638647 | 6.303461  | 8.557215  |
| O | -1.796682 | 6.181072  | 9.203925  |
| C | 1.755116  | 5.514520  | 8.785295  |
| C | -0.191757 | 8.795522  | 8.134633  |
| C | -1.583515 | 9.035157  | 7.553043  |
| C | -1.867402 | 8.274592  | 6.255772  |
| C | -1.945174 | 6.755447  | 6.400468  |
| C | -0.713757 | 6.111563  | 7.039322  |
| H | -1.941414 | 11.331076 | 19.534669 |
| H | 0.338204  | 6.387717  | 20.627210 |
| H | -4.664777 | 5.143824  | 19.072315 |
| H | -5.221525 | 3.355904  | 17.507734 |
| H | -3.005296 | 3.434554  | 18.529695 |
| H | -5.189300 | 11.096410 | 13.395945 |
| H | -4.242421 | 12.370588 | 15.250071 |
| H | 5.751941  | 5.427858  | 17.285961 |
| H | 3.902276  | 3.960213  | 16.673017 |
| H | 4.785052  | 5.553139  | 15.049089 |
| H | 1.744510  | 13.445659 | 14.968748 |
| H | 4.055327  | 13.274218 | 15.738860 |
| H | 3.392670  | 12.244322 | 13.629914 |
| H | 0.076956  | 9.614663  | 8.809177  |
| H | 0.550693  | 8.785625  | 7.322525  |
| H | -1.656046 | 10.111288 | 7.348912  |
| H | -2.342340 | 8.807656  | 8.310745  |
| H | -2.809041 | 8.638821  | 5.826810  |
| H | -1.084038 | 8.531070  | 5.527215  |
| H | -2.814094 | 6.482432  | 7.008454  |
| H | -2.097141 | 6.316058  | 5.407126  |
| H | -0.761396 | 5.029299  | 6.870540  |
| H | 0.211949  | 6.461258  | 6.565257  |
| H | 1.893912  | 5.057244  | 7.793525  |
| H | 2.054068  | 6.561649  | 8.738433  |
| H | 2.411201  | 4.991801  | 9.488815  |
| H | 0.113444  | 3.495216  | 8.337706  |
| H | 0.533228  | 3.483327  | 10.062528 |
| H | -1.108010 | 3.953706  | 9.545335  |
| H | -3.992015 | 6.834651  | 11.956740 |
| H | -3.386918 | 5.469298  | 12.610114 |
| H | -3.219041 | 6.879460  | 13.398831 |

(CH<sub>3</sub>)La@ac-1

|    |           |           |           |
|----|-----------|-----------|-----------|
| 55 |           |           |           |
| O  | 2.652124  | 2.634262  | 10.924171 |
| O  | 0.543603  | -1.654290 | 9.843839  |
| O  | 1.919905  | 0.090300  | 11.286274 |
| Si | 1.095539  | -1.341773 | 11.358224 |
| O  | 2.045216  | -2.625716 | 11.826131 |
| Si | 2.902630  | -2.705170 | 13.252779 |
| O  | 4.294836  | -3.518292 | 13.173286 |
| La | 6.100704  | -2.758220 | 14.319028 |
| Si | 0.599306  | -3.022558 | 8.857219  |
| O  | -0.205320 | -1.238113 | 12.374692 |
| Si | -0.876172 | -0.870987 | 13.836592 |
| O  | -0.139057 | -1.624052 | 15.106772 |
| Si | 1.188776  | -2.417430 | 15.677749 |
| O  | 0.733944  | -3.460467 | 16.863640 |
| Si | -0.751900 | -4.101117 | 17.349395 |
| Si | 2.485238  | 1.450417  | 12.047673 |
| O  | 3.960339  | 1.206488  | 12.770483 |

|    |           |           |           |
|----|-----------|-----------|-----------|
| Si | 4.279784  | 0.057866  | 13.931451 |
| O  | 3.094844  | -1.100457 | 13.687133 |
| Si | 3.063745  | 2.650424  | 9.288680  |
| O  | 1.420000  | 2.014668  | 13.179623 |
| Si | 0.443218  | 1.769894  | 14.485706 |
| O  | -0.139404 | 3.225994  | 14.986659 |
| O  | -2.439957 | -1.383737 | 13.873368 |
| O  | -0.804338 | 0.769483  | 14.055888 |
| O  | 1.217451  | 1.097143  | 15.780544 |
| Si | 2.539912  | 0.291730  | 16.346592 |
| O  | 2.828658  | 0.733979  | 17.903242 |
| Si | 2.438300  | 2.095041  | 18.824313 |
| O  | 2.269212  | -1.358579 | 16.392232 |
| O  | 1.931146  | -3.295537 | 14.489560 |
| O  | 3.890845  | 0.640796  | 15.459012 |
| O  | 5.775137  | -0.550251 | 13.906926 |
| N  | 5.111243  | -2.893265 | 16.861533 |
| C  | 8.337993  | -3.719978 | 13.678247 |
| H  | -2.977734 | -1.083514 | 13.134758 |
| H  | 0.004592  | -4.199676 | 9.555358  |
| H  | -0.206457 | -2.691616 | 7.647258  |
| H  | -0.433156 | -5.150480 | 18.360078 |
| H  | -0.195423 | 3.883679  | 14.287068 |
| H  | 0.987522  | 2.083012  | 19.167916 |
| H  | 3.255216  | 1.997040  | 20.068211 |
| H  | 2.780789  | 3.345502  | 18.087084 |
| H  | -1.592918 | -3.037985 | 17.970714 |
| H  | -1.466844 | -4.709813 | 16.190988 |
| H  | 1.845720  | 2.415223  | 8.459682  |
| H  | 3.615493  | 4.004921  | 9.001227  |
| H  | 4.087736  | 1.606883  | 8.989329  |
| H  | 2.006201  | -3.323515 | 8.463276  |
| H  | 9.053722  | -2.958826 | 13.328956 |
| H  | 8.271350  | -4.465537 | 12.869915 |
| H  | 8.833517  | -4.234555 | 14.520410 |
| H  | 4.204506  | -2.416182 | 16.815103 |
| H  | 4.910907  | -3.821901 | 17.228845 |
| H  | 5.635760  | -2.411328 | 17.589510 |

## G

73

|    |          |           |           |
|----|----------|-----------|-----------|
| Si | 3.188257 | 2.446349  | 10.920605 |
| O  | 1.272374 | -0.787833 | 10.160389 |
| Si | 2.023961 | -0.440320 | 11.591204 |
| O  | 3.247547 | -1.531473 | 11.819761 |
| Si | 4.755973 | -1.678402 | 11.147743 |
| O  | 5.527800 | -0.228630 | 11.224428 |
| O  | 7.324045 | 1.763909  | 11.221048 |
| Si | 8.974257 | 1.432582  | 11.132479 |
| Si | 5.993575 | 1.162170  | 10.467592 |
| Si | 4.158582 | -2.065720 | 8.030224  |
| O  | 6.376936 | 0.876060  | 8.882482  |
| O  | 2.562475 | -1.638448 | 7.897452  |
| Si | 1.289120 | -0.766613 | 8.506571  |
| O  | 2.349460 | 2.751151  | 9.528964  |
| O  | 1.236171 | 0.793640  | 7.963448  |
| Si | 2.465053 | 1.930124  | 8.069962  |
| O  | 2.498892 | 2.918694  | 6.803676  |
| La | 4.414828 | 3.261245  | 5.526793  |
| N  | 5.112048 | 4.377021  | 7.901333  |
| O  | 4.587377 | -2.268935 | 9.613545  |
| O  | 5.666887 | -2.730540 | 12.029141 |
| O  | 4.821217 | 2.333098  | 10.614933 |

|    |           |           |           |
|----|-----------|-----------|-----------|
| Si | 5.323104  | 0.635314  | 7.598025  |
| O  | 5.195586  | -1.007470 | 7.288559  |
| O  | 2.629595  | 1.088143  | 11.678216 |
| O  | 2.970299  | 3.733748  | 11.918372 |
| Si | 2.363340  | 3.907874  | 13.482322 |
| O  | 0.922247  | -0.557688 | 12.810963 |
| O  | 4.310805  | -3.520554 | 7.274157  |
| Si | 5.421539  | -4.094400 | 6.143491  |
| O  | -0.089828 | -1.498511 | 7.978044  |
| Si | -0.392536 | -3.016515 | 7.317459  |
| O  | 3.833861  | 0.993492  | 8.276886  |
| O  | 5.699684  | 1.514414  | 6.308181  |
| C  | 5.380151  | 5.533789  | 4.864052  |
| O  | 3.455356  | 2.232942  | 3.253953  |
| C  | 2.289885  | 2.604883  | 3.136933  |
| O  | 1.939950  | 3.666037  | 3.865600  |
| C  | 0.560147  | 4.101241  | 4.019921  |
| C  | -0.327751 | 3.054716  | 4.670278  |
| C  | -0.835833 | 1.966470  | 3.722473  |
| C  | 0.254088  | 1.106824  | 3.082621  |
| C  | 1.289500  | 1.907899  | 2.264220  |
| H  | 5.435014  | -3.654902 | 11.900903 |
| H  | 6.820602  | -3.931666 | 6.636279  |
| H  | 5.117349  | -5.543892 | 5.964161  |
| H  | 9.587623  | 2.233364  | 10.031618 |
| H  | 0.320007  | -1.302456 | 12.726427 |
| H  | 3.113613  | 3.043094  | 14.438302 |
| H  | 2.552427  | 5.343194  | 13.840861 |
| H  | 0.911554  | 3.566172  | 13.519654 |
| H  | 9.565829  | 1.843138  | 12.437919 |
| H  | 9.219144  | -0.019840 | 10.894358 |
| H  | 0.161826  | -4.101149 | 8.180036  |
| H  | -1.876400 | -3.148424 | 7.236520  |
| H  | 0.190243  | -3.119111 | 5.946401  |
| H  | 5.259323  | -3.385426 | 4.839948  |
| H  | 0.659063  | 4.981041  | 4.655829  |
| H  | 0.188823  | 4.421978  | 3.039247  |
| H  | -1.189739 | 3.588701  | 5.088195  |
| H  | 0.215854  | 2.630867  | 5.522849  |
| H  | -1.520429 | 1.311505  | 4.272222  |
| H  | -1.431991 | 2.434478  | 2.925762  |
| H  | 0.775454  | 0.517593  | 3.846605  |
| H  | -0.210411 | 0.385495  | 2.402296  |
| H  | 1.866788  | 1.241902  | 1.620472  |
| H  | 0.778160  | 2.640725  | 1.627258  |
| H  | 4.863839  | 6.395651  | 5.319327  |
| H  | 5.309185  | 5.692694  | 3.773088  |
| H  | 6.448210  | 5.662014  | 5.106956  |
| H  | 5.150709  | 3.762967  | 8.714084  |
| H  | 6.023000  | 4.820287  | 7.815436  |
| H  | 4.451813  | 5.114444  | 8.134933  |

TS<sub>G→H</sub>

|    |          |           |           |
|----|----------|-----------|-----------|
| 73 |          |           |           |
| Si | 3.101931 | 2.114917  | 10.978849 |
| O  | 1.858648 | -1.539222 | 11.446327 |
| Si | 2.734355 | -0.661715 | 12.536218 |
| O  | 4.209118 | -1.384538 | 12.746661 |
| Si | 5.516226 | -1.496517 | 11.732695 |
| O  | 5.980832 | 0.013355  | 11.273081 |
| O  | 7.276804 | 2.204851  | 10.419081 |
| Si | 8.913696 | 2.080791  | 10.033074 |
| Si | 5.977760 | 1.230949  | 10.162726 |

|    |           |           |           |
|----|-----------|-----------|-----------|
| Si | 4.405025  | -2.784756 | 9.008773  |
| O  | 6.085434  | 0.627128  | 8.622126  |
| O  | 2.756134  | -2.662783 | 9.111069  |
| Si | 1.493731  | -1.902939 | 9.875370  |
| O  | 1.982896  | 1.949546  | 9.767878  |
| O  | 1.002180  | -0.530251 | 9.088363  |
| Si | 1.972739  | 0.734944  | 8.601403  |
| O  | 1.611442  | 1.323586  | 7.148523  |
| La | 3.123728  | 1.884562  | 5.518791  |
| N  | 3.624563  | 3.689679  | 7.498804  |
| O  | 5.112174  | -2.482637 | 10.470989 |
| O  | 6.801812  | -2.133996 | 12.540940 |
| O  | 4.641964  | 2.207258  | 10.347102 |
| Si | 4.863232  | -0.142421 | 7.767711  |
| O  | 5.064940  | -1.799820 | 7.843484  |
| O  | 2.979215  | 0.909377  | 12.096896 |
| O  | 2.802190  | 3.558221  | 11.707744 |
| Si | 2.489551  | 4.015262  | 13.301861 |
| O  | 1.912383  | -0.630179 | 13.963644 |
| O  | 4.740805  | -4.338660 | 8.587386  |
| Si | 5.720573  | -5.010352 | 7.390913  |
| O  | 0.227200  | -2.949530 | 9.912765  |
| Si | -0.180558 | -4.311019 | 9.008136  |
| O  | 3.523774  | 0.117015  | 8.737818  |
| O  | 4.721369  | 0.441577  | 6.272654  |
| C  | 3.941030  | 4.042466  | 4.073328  |
| O  | 2.372989  | 1.707662  | 3.205561  |
| C  | 2.073502  | 2.930638  | 3.131257  |
| O  | 1.101667  | 3.273561  | 4.043121  |
| C  | 0.511917  | 4.585966  | 4.040391  |
| C  | -0.592820 | 4.701098  | 3.000427  |
| C  | -0.109723 | 4.835709  | 1.554875  |
| C  | 0.831036  | 3.727177  | 1.075529  |
| C  | 2.172750  | 3.690938  | 1.833036  |
| H  | 6.695523  | -3.057152 | 12.788552 |
| H  | 7.114437  | -4.486389 | 7.489369  |
| H  | 5.717561  | -6.482344 | 7.630875  |
| H  | 9.155909  | 2.699695  | 8.695815  |
| H  | 1.319858  | -1.378366 | 14.082571 |
| H  | 3.579232  | 3.549706  | 14.207473 |
| H  | 2.436144  | 5.505983  | 13.297769 |
| H  | 1.179311  | 3.464699  | 13.754369 |
| H  | 9.663384  | 2.837995  | 11.075700 |
| H  | 9.354004  | 0.655803  | 10.015764 |
| H  | 0.664032  | -5.473117 | 9.411647  |
| H  | -1.612023 | -4.601887 | 9.307676  |
| H  | -0.012324 | -4.050439 | 7.547816  |
| H  | 5.167067  | -4.721159 | 6.035484  |
| H  | 0.099864  | 4.696669  | 5.046264  |
| H  | 1.294729  | 5.341187  | 3.905711  |
| H  | -1.201236 | 5.577006  | 3.258647  |
| H  | -1.246145 | 3.826502  | 3.108321  |
| H  | -0.984648 | 4.874450  | 0.895391  |
| H  | 0.402289  | 5.801594  | 1.437932  |
| H  | 0.340570  | 2.747893  | 1.135245  |
| H  | 1.054265  | 3.894070  | 0.015922  |
| H  | 2.934045  | 3.169329  | 1.249503  |
| H  | 2.529568  | 4.711728  | 1.997312  |
| H  | 3.554341  | 5.068148  | 4.075833  |
| H  | 4.506258  | 3.893657  | 3.146894  |
| H  | 4.704555  | 4.025975  | 4.878174  |
| H  | 4.242504  | 3.300171  | 8.212362  |
| H  | 4.001293  | 4.600958  | 7.251461  |



H 2.741607 3.843866 7.983586

**H**

73

|    |           |           |           |
|----|-----------|-----------|-----------|
| Si | 2.877300  | 2.011072  | 10.594815 |
| O  | 1.848831  | -1.600588 | 10.937246 |
| Si | 2.589441  | -0.740598 | 12.133759 |
| O  | 4.063443  | -1.427920 | 12.450274 |
| Si | 5.489394  | -1.416656 | 11.609135 |
| O  | 5.831961  | 0.138519  | 11.176341 |
| O  | 7.061296  | 2.400232  | 10.415637 |
| Si | 8.365416  | 2.349001  | 11.487234 |
| Si | 5.861172  | 1.337586  | 10.046009 |
| Si | 4.770244  | -2.804035 | 8.831654  |
| O  | 6.173053  | 0.749968  | 8.530227  |
| O  | 3.116763  | -2.791946 | 8.831408  |
| Si | 1.711190  | -2.107901 | 9.369180  |
| O  | 1.853016  | 1.666831  | 9.343155  |
| O  | 1.199832  | -0.837302 | 8.426031  |
| Si | 2.090801  | 0.540675  | 8.120721  |
| O  | 1.848947  | 1.186624  | 6.664324  |
| La | 3.533200  | 1.946718  | 5.319778  |
| N  | 4.798580  | 3.567581  | 7.096697  |
| O  | 5.372583  | -2.455660 | 10.333338 |
| O  | 6.727909  | -1.903595 | 12.579581 |
| O  | 4.443550  | 2.220285  | 10.052504 |
| Si | 5.112791  | -0.137388 | 7.569013  |
| O  | 5.432626  | -1.768610 | 7.713197  |
| O  | 2.805420  | 0.854268  | 11.769831 |
| O  | 2.426158  | 3.456325  | 11.234685 |
| Si | 1.579991  | 3.908460  | 12.622839 |
| O  | 1.649135  | -0.763573 | 13.485649 |
| O  | 5.256212  | -4.326528 | 8.452663  |
| Si | 6.073340  | -4.986423 | 7.133784  |
| O  | 0.548650  | -3.267362 | 9.315075  |
| Si | -0.943940 | -3.367713 | 8.537695  |
| O  | 3.667508  | 0.051288  | 8.392571  |
| O  | 5.084079  | 0.416681  | 6.059102  |
| C  | 3.737803  | 4.263652  | 1.937814  |
| O  | 3.304765  | 2.197391  | 3.064433  |
| C  | 2.771594  | 3.407635  | 2.751612  |
| O  | 2.617175  | 4.073964  | 4.097181  |
| C  | 1.690624  | 5.145032  | 4.275960  |
| C  | 0.325832  | 4.646353  | 4.735505  |
| C  | -0.486871 | 3.920388  | 3.661803  |
| C  | 0.248861  | 2.792140  | 2.930578  |
| C  | 1.407363  | 3.274752  | 2.053800  |
| H  | 6.832402  | -2.858295 | 12.630901 |
| H  | 7.470029  | -4.464866 | 7.069518  |
| H  | 6.096180  | -6.460723 | 7.355640  |
| H  | 9.172634  | 3.571724  | 11.207719 |
| H  | 1.292970  | -1.629607 | 13.704898 |
| H  | 2.398465  | 3.637346  | 13.839618 |
| H  | 1.333734  | 5.374058  | 12.495474 |
| H  | 0.280134  | 3.181784  | 12.709535 |
| H  | 7.879761  | 2.374359  | 12.896944 |
| H  | 9.191461  | 1.129880  | 11.252103 |
| H  | -1.505628 | -4.703412 | 8.889404  |
| H  | -1.862308 | -2.293708 | 9.018393  |
| H  | -0.776571 | -3.263019 | 7.058601  |
| H  | 5.359791  | -4.677563 | 5.860015  |
| H  | 2.126732  | 5.804842  | 5.035602  |
| H  | 1.615130  | 5.730667  | 3.350726  |

|   |           |          |          |
|---|-----------|----------|----------|
| H | -0.248070 | 5.505870 | 5.106288 |
| H | 0.478638  | 3.985796 | 5.600110 |
| H | -1.395006 | 3.518695 | 4.126734 |
| H | -0.825627 | 4.652003 | 2.914123 |
| H | 0.604166  | 2.036269 | 3.644580 |
| H | -0.476088 | 2.271100 | 2.294701 |
| H | 1.590214  | 2.560920 | 1.243901 |
| H | 1.130146  | 4.221286 | 1.571126 |
| H | 3.365917  | 5.283134 | 1.790683 |
| H | 3.887726  | 3.807241 | 0.955191 |
| H | 4.705233  | 4.306416 | 2.445794 |
| H | 5.792993  | 3.345937 | 7.068706 |
| H | 4.721095  | 4.579609 | 7.031628 |
| H | 4.506360  | 3.313890 | 8.044167 |

TS<sub>E→I</sub>

73

|    |           |           |           |
|----|-----------|-----------|-----------|
| C  | -6.590531 | 0.251177  | 7.126994  |
| C  | -5.146897 | 0.506226  | 7.470436  |
| O  | -4.475075 | -0.395231 | 8.042128  |
| La | -3.215308 | -1.638969 | 6.288350  |
| O  | -4.406177 | 0.170786  | 5.469321  |
| C  | -4.309488 | 1.235366  | 4.563065  |
| C  | -3.029607 | 2.052015  | 4.750690  |
| C  | -2.979095 | 2.948648  | 5.991521  |
| C  | -3.255610 | 2.292490  | 7.352412  |
| C  | -4.732166 | 1.953603  | 7.604760  |
| Si | -0.051759 | -2.705671 | 5.344473  |
| O  | -0.831594 | -4.169913 | 5.127633  |
| Si | -2.389570 | -4.771836 | 5.004756  |
| O  | -2.435549 | -5.399985 | 3.458259  |
| Si | -1.101064 | -5.835487 | 2.567121  |
| O  | -0.027308 | -4.595433 | 2.343681  |
| Si | 1.279140  | -3.749904 | 2.917509  |
| O  | 2.033665  | -3.067580 | 1.627767  |
| Si | 1.658559  | -2.974144 | -0.012919 |
| O  | 0.857150  | -2.531528 | 3.958764  |
| O  | 0.938864  | -3.028212 | 6.663855  |
| Si | 1.251577  | -4.518381 | 7.313625  |
| O  | 1.989334  | -4.269234 | 8.762571  |
| Si | 3.509147  | -4.672566 | 9.375164  |
| O  | -1.042042 | -1.467856 | 5.637780  |
| O  | 2.373646  | -4.740974 | 3.663566  |
| Si | 2.755658  | -5.834825 | 4.836711  |
| O  | 4.394695  | -5.974096 | 4.927814  |
| O  | -0.165156 | -5.337547 | 7.640922  |
| Si | -1.044332 | -6.577102 | 6.955073  |
| O  | -2.369996 | -6.019930 | 6.130478  |
| O  | 2.250596  | -5.408402 | 6.348213  |
| O  | 2.082176  | -7.295453 | 4.440241  |
| Si | 0.511121  | -7.825486 | 4.478767  |
| O  | 0.468432  | -9.445416 | 4.184575  |
| O  | -0.080455 | -7.503926 | 5.992106  |
| O  | -0.371959 | -7.135766 | 3.280220  |
| O  | -1.590097 | -7.494284 | 8.209232  |
| Si | -3.060861 | -8.262531 | 8.505319  |
| O  | -1.617665 | -6.273340 | 1.071078  |
| Si | -3.086602 | -6.856909 | 0.483930  |
| O  | -3.539198 | -3.690277 | 5.321153  |
| N  | -1.997840 | -2.623832 | 8.531589  |
| H  | 0.978662  | -9.972311 | 4.806700  |
| H  | -4.101715 | -7.255488 | 8.871613  |
| H  | -3.641127 | -7.910807 | 1.383118  |

|   |           |           |           |
|---|-----------|-----------|-----------|
| H | 4.839388  | -5.888586 | 4.079228  |
| H | -2.830857 | -9.181150 | 9.657016  |
| H | -3.511470 | -9.040012 | 7.314592  |
| H | 3.533826  | -4.164025 | 10.777166 |
| H | 3.699755  | -6.152090 | 9.371382  |
| H | 4.587322  | -4.017503 | 8.579844  |
| H | -2.802738 | -7.434735 | -0.860926 |
| H | -4.067171 | -5.739263 | 0.353232  |
| H | 2.696979  | -2.097395 | -0.626545 |
| H | 1.707688  | -4.327436 | -0.639502 |
| H | 0.307263  | -2.373434 | -0.213957 |
| H | -4.335191 | 0.845026  | 3.532711  |
| H | -5.190058 | 1.897299  | 4.653088  |
| H | -2.884720 | 2.686596  | 3.865880  |
| H | -2.181257 | 1.352862  | 4.761685  |
| H | -1.985816 | 3.412878  | 6.032155  |
| H | -3.689079 | 3.778566  | 5.863897  |
| H | -2.639321 | 1.393982  | 7.487813  |
| H | -2.923461 | 2.988407  | 8.130945  |
| H | -4.995007 | 2.193167  | 8.646541  |
| H | -5.382200 | 2.579592  | 6.985330  |
| H | -6.905141 | 0.826443  | 6.255090  |
| H | -7.203434 | 0.563907  | 7.983273  |
| H | -6.768166 | -0.811823 | 6.955144  |
| H | -2.530708 | -2.615284 | 9.397626  |
| H | -1.663084 | -3.578648 | 8.394374  |
| H | -1.157826 | -2.072086 | 8.695726  |

## I

73

|    |           |           |           |
|----|-----------|-----------|-----------|
| C  | -6.070637 | -0.411283 | 9.151606  |
| C  | -5.157262 | -0.179986 | 7.984876  |
| O  | -4.131663 | -0.855116 | 7.856789  |
| La | -2.334112 | -1.107034 | 5.904190  |
| O  | -3.152922 | 0.723695  | 4.995231  |
| C  | -3.581180 | 1.848421  | 4.293910  |
| C  | -3.637488 | 3.117451  | 5.150360  |
| C  | -4.764475 | 3.231961  | 6.186484  |
| C  | -4.743453 | 2.209909  | 7.336128  |
| C  | -5.498911 | 0.902183  | 6.999095  |
| Si | 0.575817  | -2.902671 | 5.143824  |
| O  | -0.444380 | -4.214304 | 4.933555  |
| Si | -2.098334 | -4.450230 | 4.814532  |
| O  | -2.253219 | -5.135037 | 3.296182  |
| Si | -0.991411 | -5.774203 | 2.421746  |
| O  | 0.254434  | -4.707169 | 2.181514  |
| Si | 1.743924  | -4.269115 | 2.771424  |
| O  | 2.646741  | -3.738664 | 1.504356  |
| Si | 2.264025  | -3.268292 | -0.067549 |
| O  | 1.661543  | -3.047612 | 3.888870  |
| O  | 1.307952  | -3.291819 | 6.618902  |
| Si | 1.431874  | -4.846379 | 7.198090  |
| O  | 2.204091  | -4.750184 | 8.648861  |
| Si | 3.735253  | -5.220897 | 9.175231  |
| O  | -0.154877 | -1.478369 | 5.247586  |
| O  | 2.538250  | -5.564737 | 3.424299  |
| Si | 2.713128  | -6.524158 | 4.756883  |
| O  | 4.292792  | -6.972731 | 4.898733  |
| O  | -0.060519 | -5.499861 | 7.503453  |
| Si | -1.229034 | -6.465144 | 6.828090  |
| O  | -2.380025 | -5.609221 | 5.997151  |
| O  | 2.331430  | -5.775945 | 6.174380  |
| O  | 1.760518  | -7.864275 | 4.560505  |

|    |           |            |           |
|----|-----------|------------|-----------|
| Si | 0.117545  | -8.034729  | 4.413012  |
| O  | -0.244385 | -9.604298  | 4.064294  |
| O  | -0.555283 | -7.625271  | 5.868012  |
| O  | -0.442087 | -7.152644  | 3.148366  |
| O  | -1.987412 | -7.216386  | 8.084097  |
| Si | -3.612909 | -7.444865  | 8.452473  |
| O  | -1.566729 | -6.156588  | 0.930070  |
| Si | -3.109652 | -6.503698  | 0.349453  |
| O  | -2.985267 | -3.129163  | 5.052068  |
| N  | -0.916275 | -1.474894  | 8.230693  |
| H  | -0.020944 | -10.221661 | 4.767117  |
| H  | -4.250451 | -6.148785  | 8.837155  |
| H  | -3.830501 | -7.436495  | 1.264751  |
| H  | 4.735433  | -7.097588  | 4.053910  |
| H  | -3.653725 | -8.377354  | 9.616097  |
| H  | -4.352503 | -8.040910  | 7.301754  |
| H  | 3.842825  | -4.758372  | 10.589867 |
| H  | 3.877218  | -6.704539  | 9.118665  |
| H  | 4.800288  | -4.575493  | 8.353621  |
| H  | -2.924774 | -7.146047  | -0.983732 |
| H  | -3.897838 | -5.245628  | 0.192627  |
| H  | 3.495317  | -2.639754  | -0.627326 |
| H  | 1.887074  | -4.454485  | -0.890353 |
| H  | 1.147150  | -2.277871  | -0.070188 |
| H  | -2.905626 | 2.045200   | 3.445634  |
| H  | -4.580109 | 1.673961   | 3.852134  |
| H  | -3.729323 | 3.974917   | 4.469384  |
| H  | -2.666977 | 3.229342   | 5.653789  |
| H  | -4.706417 | 4.234816   | 6.627640  |
| H  | -5.738850 | 3.188435   | 5.679717  |
| H  | -3.702661 | 1.974925   | 7.587592  |
| H  | -5.192450 | 2.653021   | 8.233771  |
| H  | -6.577313 | 1.093065   | 6.994823  |
| H  | -5.177691 | 0.570824   | 6.007634  |
| H  | -7.014929 | -0.830256  | 8.782255  |
| H  | -6.320659 | 0.538756   | 9.636113  |
| H  | -5.625148 | -1.101845  | 9.868258  |
| H  | -0.585799 | -0.657253  | 8.736889  |
| H  | -1.342713 | -2.086799  | 8.922475  |
| H  | -0.081044 | -1.952444  | 7.882724  |
